# Supplementary material for: Genome-wide identification of the cucumber 2-OXOGLUTARATE-DEPENDENT DIOXYGENASE (Cs2OGD) superfamily and functional analysis of CsF3H2 in salt stress response
Source: Research Square preprint supplement (doi:10.21203/rs.3.rs-8517910/v1), 2026-01-16
Supplement: Supplementary file 1 [file 9396e68393d120906d6abdd7.docx]

***Plant Cell Reports***

**Genome-wide identification of the cucumber 2-OXOGLUTARATE-DEPENDENT DIOXYGENASE (Cs2OGD) superfamily and functional analysis of *CsF3H2* in salt stress response**

Xiaojie Fenga1, Xiaoqin Wangb1, Kunhao Xiea, Zhiqi Hea, Bingbing Tanga, Xianchang Yua, Chaoxing Hea, Yan Yana, Jun Wanga, Fenglin Zhongc, Mintao Suna*, Yansu Lia*

*Correspondence: sunmintao@caas.cn, liyansu@caas.cn

1These authors contributed equally to this study.

a State Key Laboratory of Vegetable Biobreeding, Institute of Vegetables and Flowers, Chinese Academy of Agricultural Sciences, Beijing 100081, China

b College of Biological Sciences and Technology, Yili Normal University, Yining, 835000, China

c College of Horticulture, Fujian Agriculture and Forestry University, 350002, Fuzhou, China

**Supplementary Figures**


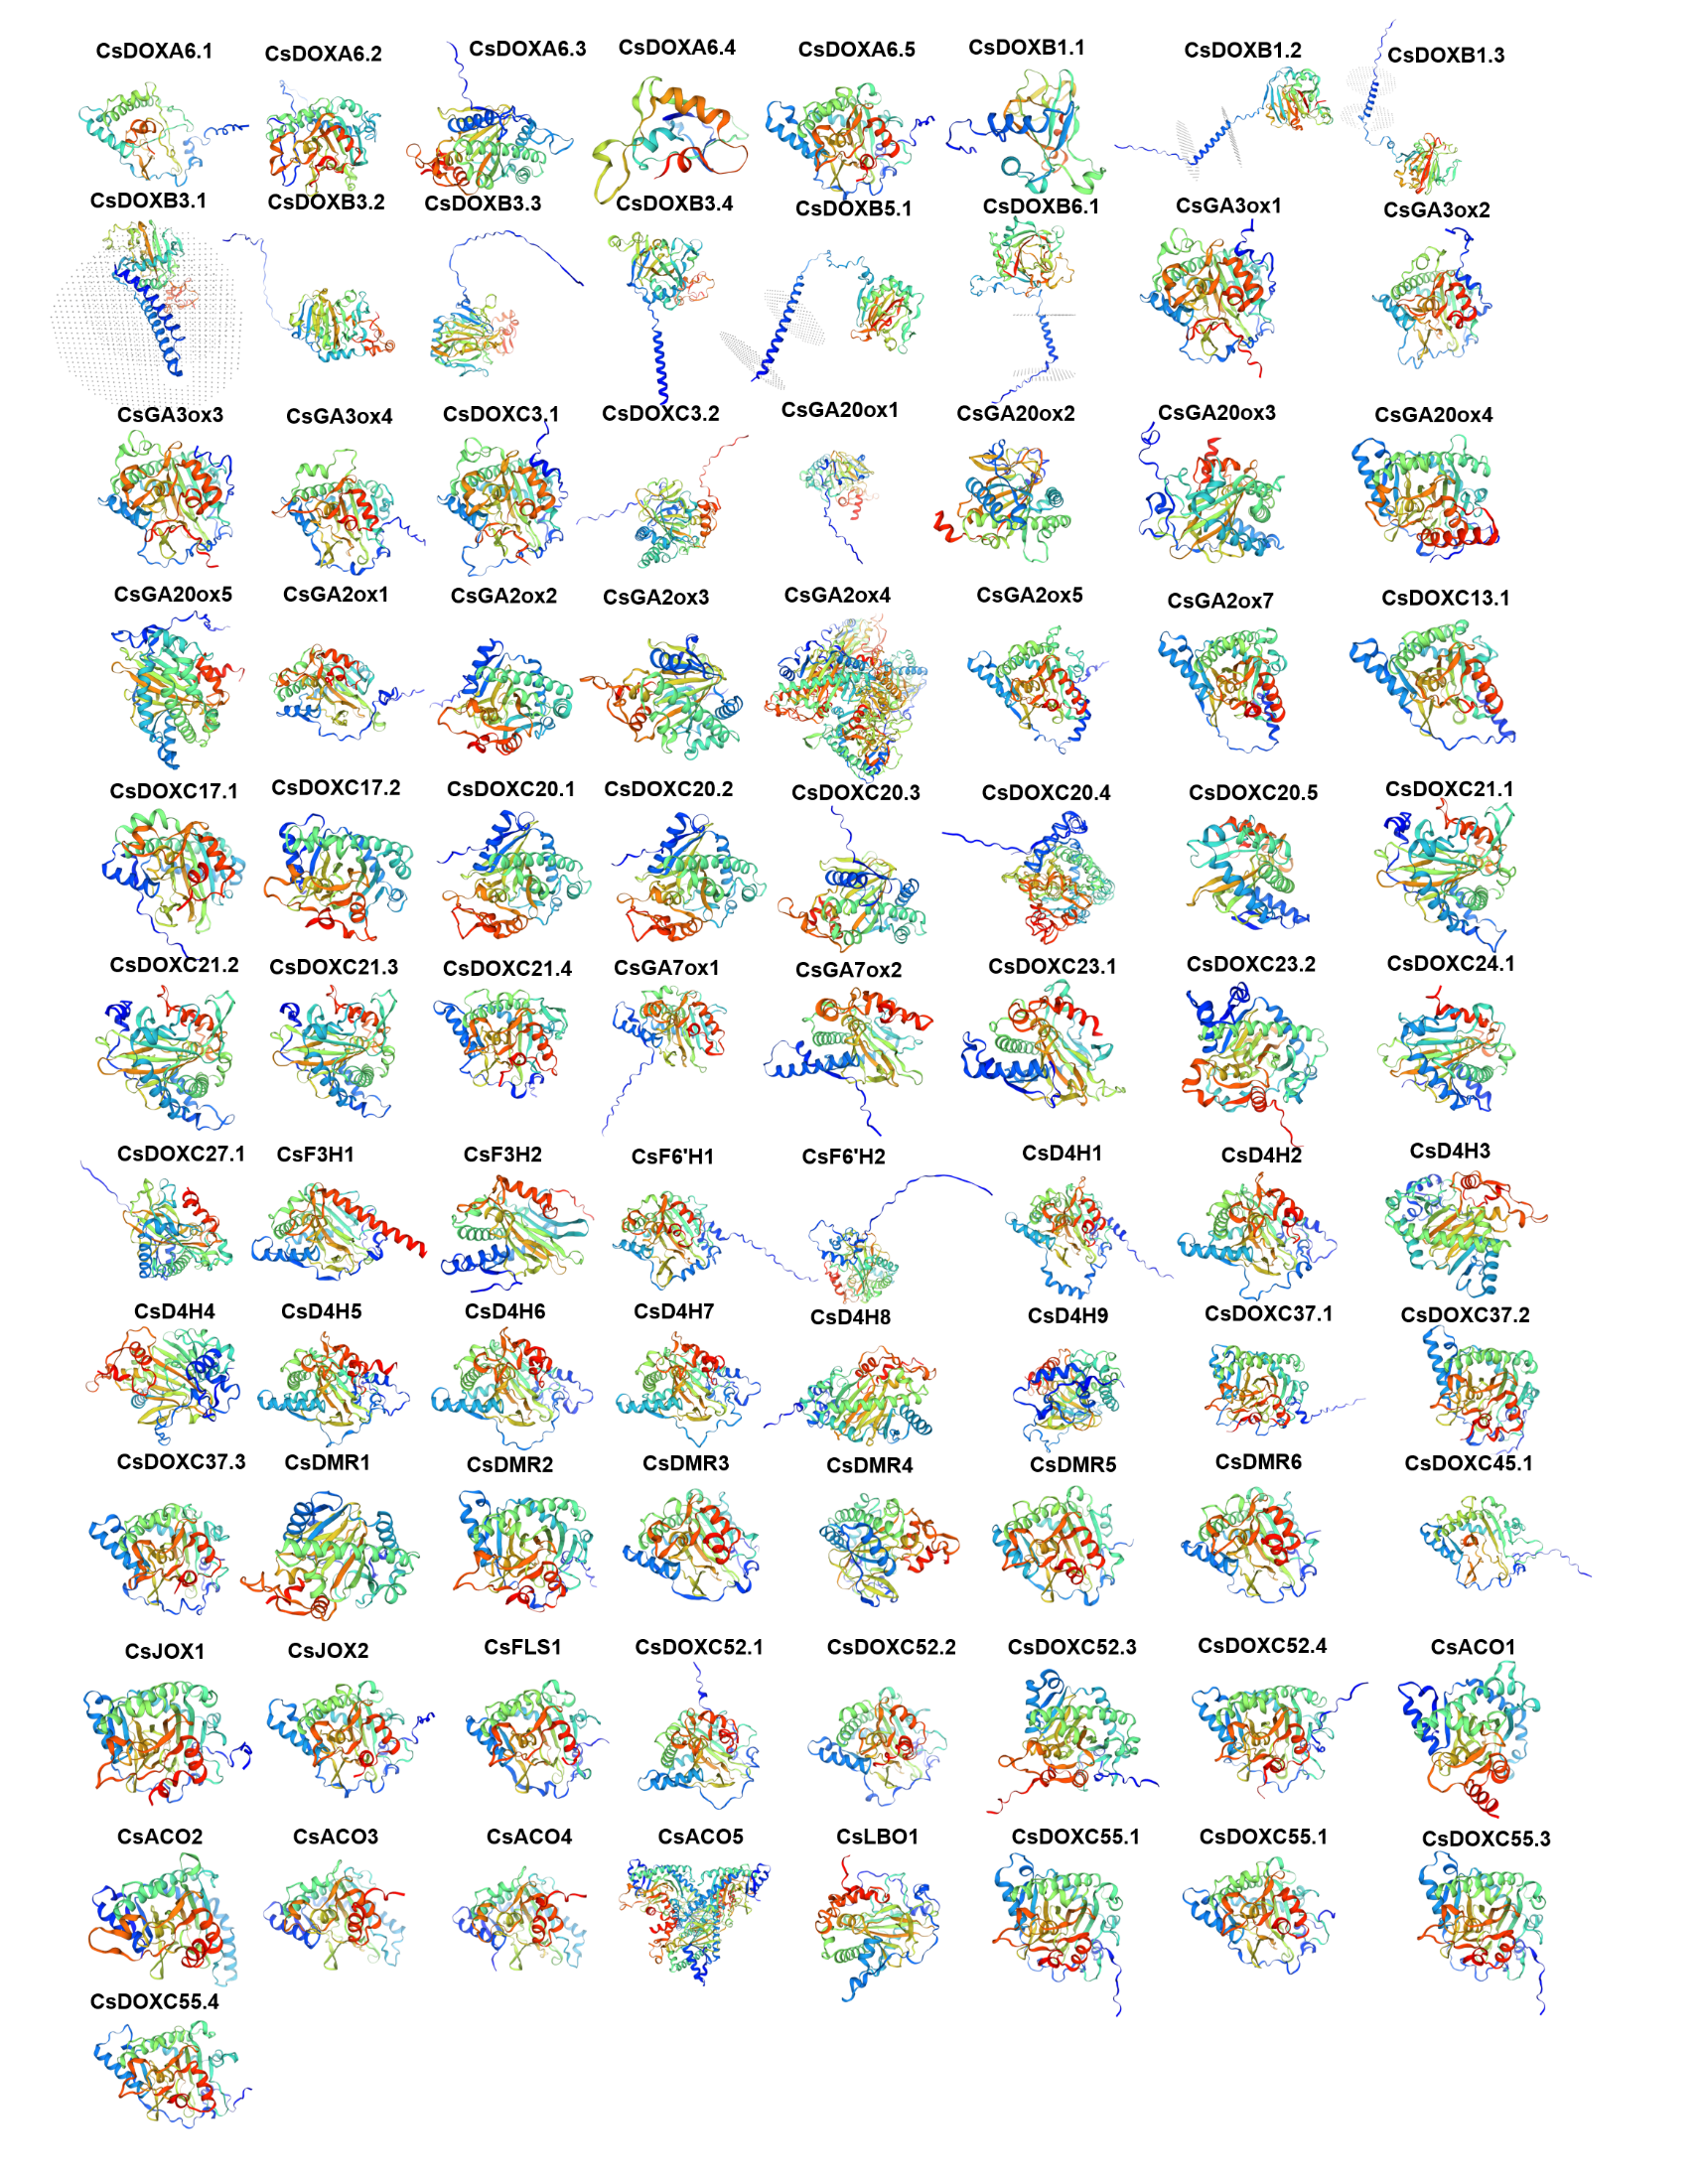


**Fig. S1** Predicted 3D structures of the Cs2OGD proteins. The structures of the Cs2OGD superfamily proteins were predicted using the SWISS-model. The selection was based on the high global model quality assessment (GMQE) value, sequence consistency, and low qualitative model energy analysis (QMEN) score.


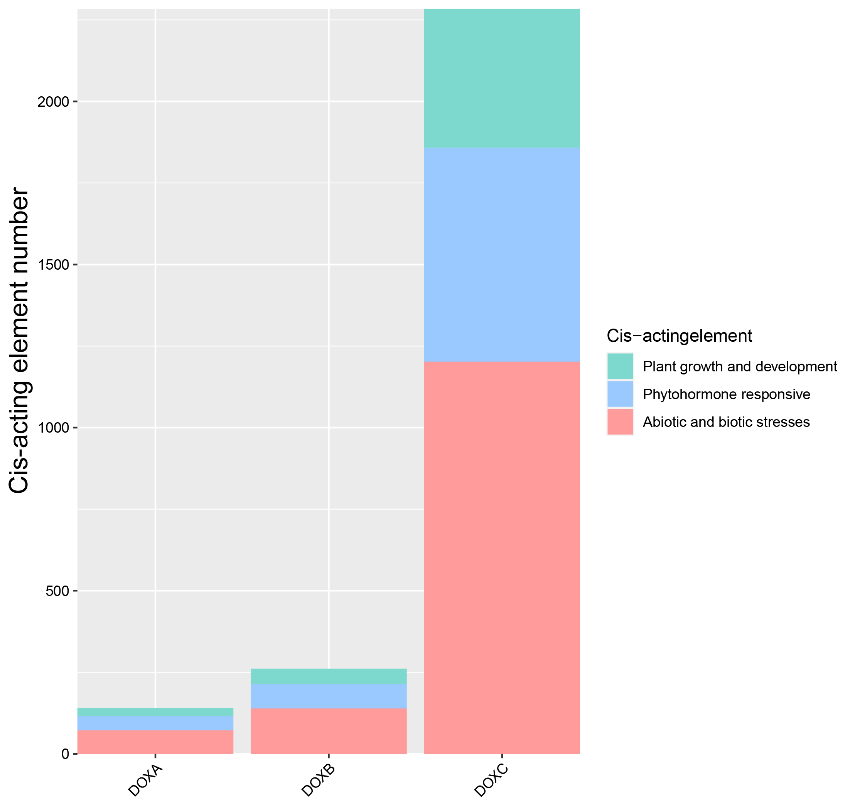


**Fig. S2** Statistical analysis of cis-acting elements in the *Cs2OGD* gene promoter. Extract the promoter region of 2000 bp above the 5' UTR of all *Cs2OGD* genes. The cis-regulatory elements in these sequences were predicted using the Plantcare database. The numbers of cis-regulatory elements in the DOXA, DOXB, and DOXC subfamilies related to plant growth and development, phytohormone response, abiotic and biotic stress were classified, counted, summarized and visualized.
