# Supplementary material for: Genome-wide identification of the cucumber 2-OXOGLUTARATE-DEPENDENT DIOXYGENASE (Cs2OGD) superfamily and functional analysis of CsF3H2 in salt stress response
Source: Research Square preprint supplement (doi:10.21203/rs.3.rs-8517910/v1), 2026-01-16
Supplement: Supplementary file 2 [file 9b0ecb908745e9a351b50ef6.xlsx]

## Sheet: Table S1
Table S1. The Ka/Ks ratios of the duplicated Cs2OGD gene pairs.
gene1	gene2	Ka	Ks	Ka/Ks	EffectiveLen	AverageS-sites	AverageN-sites	cN	cS	pN	pS	Note
CsGA2ox3	CsGA2ox4	0.238746	2.76	0.0865024	963	214.75	748.25	153	157	0.204477	0.731083
CsD4H1	CsD4H2	0.482252	3.56144	0.135409	1095	243.667	851.333	302.833	181.167	0.355717	0.743502
CsGA3ox2	CsGA3ox1	0.457696	2.94549	0.155389	1044	258.083	785.917	269.25	189.75	0.342594	0.735228
CsDOXB3.1	CsDOXB3.4	0.182454	1.3119	0.139076	897	207	690	111.75	128.25	0.161957	0.619565
CsGA20ox4	CsGA20ox1	0.332739	1.72576	0.192807	1074	229.917	844.083	226.833	155.167	0.268733	0.674882
CsJOX1	CsDOXA6.5	0.316934	1.90869	0.166048	1044	236.083	807.917	208.833	163.167	0.258484	0.69114
CsDOXB3.2	CsDOXB3.3	0.285467	1.43344	0.199148	927	206.417	720.583	171.083	131.917	0.237423	0.63908
CsACO3	CsACO4	0.180217	NaN	NaN	939	204.5	734.5	117.667	173.333	0.1602	0.847596	High Sequence Divergence Value (pS>=0.75)

## Sheet: Table S2
Table S2. The collinearity relationship in Cucumber, Arabidopsis,Rice,Tomato and Cucumis melo.
Collinear Gene Pairs
Gene ID (Arabidopsis,Rice,Tomato, Cucumis melo)	Gene ID (Cucumber)	Gene Name (Cucumber)	Subfamily(Cucumber)	Clade (Cucumber)
Os06t0176300-00	CsaV3_1G028060.1	CsDOXC55.1	DOXC	DOXC55
Os06t0177600-00	CsaV3_1G028300.1	CsDOXC55.2	DOXC	DOXC55
Os01t0177400-01	CsaV3_2G031670.1	CsGA3ox2	DOXC	DOXC3
Os01t0188100-01	CsaV3_2G001960.1	CsDOXC27.1	DOXC	DOXC27
Os05t0178100-01	CsaV3_2G031670.1	CsGA3ox2	DOXC	DOXC3
Os01t0832600-01	CsaV3_3G033740.1	CsJOX1	DOXC	DOXC46
Os01t0935400-00	CsaV3_3G014440.1	CsLBO1	DOXC	DOXC54
Os03t0289800-01	CsaV3_3G033740.1	CsJOX1	DOXC	DOXC46
Os04t0182200-01	CsaV3_3G012230.1	CsD4H2	DOXC	DOXC31
Os01t0832600-01	CsaV3_5G010170.1	CsDOXA6.5	DOXA	DOXA6
Os03t0289800-01	CsaV3_5G010170.1	CsDOXA6.5	DOXA	DOXA6
Os01t0883800-02	CsaV3_6G031260.1	CsGA20ox5	DOXC	DOXC7
Os03t0761900-01	CsaV3_6G043860.1	CsDOXB6.1	DOXB	DOXB6
Os01t0177400-01	CsaV3_7G032870.1	CsGA3ox1	DOXC	DOXC3
Os01t0332200-01	CsaV3_7G030210.1	CsGA2ox2	DOXC	DOXC12
Os05t0178100-01	CsaV3_7G032870.1	CsGA3ox1	DOXC	DOXC3
Solyc10g005360.3.1	CsaV3_1G011060.1	CsGA2ox5	DOXC	DOXC13
Solyc02g080120.2.1	CsaV3_1G011060.1	CsGA2ox5	DOXC	DOXC13
Solyc03g116260.3.1	CsaV3_1G005340.1	CsGA7ox2	DOXC	DOXC22
Solyc06g069900.3.1	CsaV3_1G005340.1	CsGA7ox2	DOXC	DOXC22
Solyc08g016660.2.1	CsaV3_1G032430.1	CsGA2ox3	DOXC	DOXC12
Solyc02g093070.3.1	CsaV3_2G035650.1	CsDOXC23.1	DOXC	DOXC23
Solyc05g018125.1.1	CsaV3_2G001960.1	CsDOXC27.1	DOXC	DOXC27
Solyc06g066820.3.1	CsaV3_2G031670.1	CsGA3ox2	DOXC	DOXC3
Solyc09g089680.3.1	CsaV3_2G012920.1	CsD4H1	DOXC	DOXC31
Solyc01g080530.3.1	CsaV3_3G014000.1	CsDOXB3.1	DOXB	DOXB3
Solyc01g067620.3.1	CsaV3_3G014440.1	CsLBO1	DOXC	DOXC54
Solyc01g093970.3.1	CsaV3_3G016600.1	CsGA20ox4	DOXC	DOXC7
Solyc10g076660.2.1	CsaV3_3G033740.1	CsJOX1	DOXC	DOXC46
Solyc10g085190.2.1	CsaV3_3G033740.1	CsJOX1	DOXC	DOXC46
Solyc11g007900.2.1	CsaV3_3G036510.1	CsDOXC37.1	DOXC	DOXC37
Solyc02g083860.3.1	CsaV3_3G000790.1	CsF3H1	DOXC	DOXC28
Solyc02g067530.3.1	CsaV3_3G041850.1	CsDOXB3.2	DOXB	DOXB3
Solyc03g006880.3.1	CsaV3_3G016600.1	CsGA20ox4	DOXC	DOXC7
Solyc06g054490.3.1	CsaV3_3G014000.1	CsDOXB3.1	DOXB	DOXB3
Solyc06g035530.3.1	CsaV3_3G016600.1	CsGA20ox4	DOXC	DOXC7
Solyc06g060800.3.1	CsaV3_3G002550.1	CsDOXC24.1	DOXC	DOXC24
Solyc08g078330.3.1	CsaV3_3G002550.1	CsDOXC24.1	DOXC	DOXC24
Solyc09g008560.3.1	CsaV3_3G036510.1	CsDOXC37.1	DOXC	DOXC37
Solyc09g089680.3.1	CsaV3_3G012230.1	CsD4H2	DOXC	DOXC31
Solyc01g105650.3.1	CsaV3_4G009640.1	CsDOXC37.3	DOXC	DOXC37
Solyc03g080190.3.1	CsaV3_4G008570.1	CsDMR1	DOXC	DOXC38
Solyc06g060070.3.1	CsaV3_4G028040.1	CsACO2	DOXC	DOXC53
Solyc07g061720.3.1	CsaV3_4G007790.1	CsGA2ox1	DOXC	DOXC12
Solyc07g056670.3.1	CsaV3_4G007790.1	CsGA2ox1	DOXC	DOXC12
Solyc10g076660.2.1	CsaV3_5G010170.1	CsDOXA6.5	DOXA	DOXA6
Solyc02g087500.2.1	CsaV3_5G037760.1	CsDOXB3.3	DOXB	DOXB3
Solyc02g067530.3.1	CsaV3_5G037760.1	CsDOXB3.3	DOXB	DOXB3
Solyc03g096050.3.1	CsaV3_5G010170.1	CsDOXA6.5	DOXA	DOXA6
Solyc03g006880.3.1	CsaV3_5G005560.1	CsGA20ox1	DOXC	DOXC7
Solyc04g007980.3.1	CsaV3_5G037020.1	CsF6'H2	DOXC	DOXC30
Solyc01g094590.3.1	CsaV3_6G000540.1	CsDOXC17.2	DOXC	DOXC17
Solyc01g080530.3.1	CsaV3_6G005580.1	CsDOXB3.4	DOXB	DOXB3
Solyc11g013110.2.1	CsaV3_6G003560.1	CsFLS1	DOXC	DOXC47
Solyc02g081190.3.1	CsaV3_6G048630.1	CsACO5	DOXC	DOXC53
Solyc02g071360.3.1	CsaV3_6G051290.1	CsDOXC52.2	DOXC	DOXC52
Solyc02g083390.3.1	CsaV3_6G047520.1	CsDOXB1.3	DOXB	DOXB1
Solyc02g092710.3.1	CsaV3_6G043860.1	CsDOXB6.1	DOXB	DOXB6
Solyc02g064750.3.1	CsaV3_6G043860.1	CsDOXB6.1	DOXB	DOXB6
Solyc03g033320.3.1	CsaV3_6G047520.1	CsDOXB1.3	DOXB	DOXB1
Solyc03g025490.3.1	CsaV3_6G000540.1	CsDOXC17.2	DOXC	DOXC17
Solyc04g081930.3.1	CsaV3_6G047520.1	CsDOXB1.3	DOXB	DOXB1
Solyc07g049530.3.1	CsaV3_6G037780.1	CsACO4	DOXC	DOXC53
Solyc07g049530.3.1	CsaV3_6G015400.1	CsACO3	DOXC	DOXC53
Solyc08g016660.2.1	CsaV3_6G051750.1	CsGA2ox4	DOXC	DOXC12
Solyc01g108860.3.1	CsaV3_7G008890.1	CsDOXC21.1	DOXC	DOXC21
Solyc01g079200.3.1	CsaV3_7G030210.1	CsGA2ox2	DOXC	DOXC12
Solyc12g042980.2.1	CsaV3_7G032850.1	CsDOXC20.4	DOXC	DOXC20
Solyc03g119910.3.1	CsaV3_7G032870.1	CsGA3ox1	DOXC	DOXC3
Solyc05g053340.3.1	CsaV3_7G030210.1	CsGA2ox2	DOXC	DOXC12
Solyc06g083910.3.1	CsaV3_7G027400.1	CsDMR3	DOXC	DOXC38
Solyc06g066830.3.1	CsaV3_7G032850.1	CsDOXC20.4	DOXC	DOXC20
Solyc06g066820.3.1	CsaV3_7G032870.1	CsGA3ox1	DOXC	DOXC3
Solyc09g066310.3.1	CsaV3_7G027400.1	CsDMR3	DOXC	DOXC38
AT1G30040.1	CsaV3_1G032430.1	CsGA2ox3	DOXC	DOXC12
AT1G04350.1	CsaV3_2G012920.1	CsD4H1	DOXC	DOXC31
AT1G15550.1	CsaV3_2G031670.1	CsGA3ox2	DOXC	DOXC3
AT1G04350.1	CsaV3_3G012230.1	CsD4H2	DOXC	DOXC31
AT1G77330.1	CsaV3_4G028040.1	CsACO2	DOXC	DOXC53
AT1G78550.1	CsaV3_4G032760.1	CsDOXC52.1	DOXC	DOXC52
AT1G78440.1	CsaV3_4G007790.1	CsGA2ox1	DOXC	DOXC12
AT1G17010.1	CsaV3_4G032760.1	CsDOXC52.1	DOXC	DOXC52
AT1G30040.1	CsaV3_6G051750.1	CsGA2ox4	DOXC	DOXC12
AT1G20270.1	CsaV3_6G047520.1	CsDOXB1.3	DOXB	DOXB1
AT1G44090.1	CsaV3_6G031260.1	CsGA20ox5	DOXC	DOXC7
AT1G12010.1	CsaV3_6G048630.1	CsACO5	DOXC	DOXC53
AT1G62380.1	CsaV3_6G048630.1	CsACO5	DOXC	DOXC53
AT1G05010.1	CsaV3_6G015400.1	CsACO3	DOXC	DOXC53
AT1G80320.1	CsaV3_7G032850.1	CsDOXC20.4	DOXC	DOXC20
AT1G80330.1	CsaV3_7G032870.1	CsGA3ox1	DOXC	DOXC3
AT1G15540.3	CsaV3_7G032850.1	CsDOXC20.4	DOXC	DOXC20
AT1G15550.1	CsaV3_7G032870.1	CsGA3ox1	DOXC	DOXC3
AT1G52790.1	CsaV3_7G032850.1	CsDOXC20.4	DOXC	DOXC20
AT1G52810.1	CsaV3_7G032860.1	CsDOXC20.5	DOXC	DOXC20
AT2G19590.1	CsaV3_2G001540.1	CsACO1	DOXC	DOXC53
AT2G36690.1	CsaV3_3G036510.1	CsDOXC37.1	DOXC	DOXC37
AT2G38240.1	CsaV3_3G033740.1	CsJOX1	DOXC	DOXC46
AT2G43080.1	CsaV3_4G003800.1	CsDOXB5.1	DOXB	DOXB5
AT2G34555.1	CsaV3_6G051750.1	CsGA2ox4	DOXC	DOXC12
AT2G23096.1	CsaV3_6G043860.1	CsDOXB6.1	DOXB	DOXB6
AT2G17720.1	CsaV3_6G047520.1	CsDOXB1.3	DOXB	DOXB1
AT3G06300.1	CsaV3_3G014000.1	CsDOXB3.1	DOXB	DOXB3
AT3G11180.2	CsaV3_3G033740.1	CsJOX1	DOXC	DOXC46
AT3G28480.2	CsaV3_3G041850.1	CsDOXB3.2	DOXB	DOXB3
AT3G51240.1	CsaV3_3G000790.1	CsF3H1	DOXC	DOXC28
AT3G21420.1	CsaV3_3G014440.1	CsLBO1	DOXC	DOXC54
AT3G55970.1	CsaV3_5G010170.1	CsDOXA6.5	DOXA	DOXA6
AT3G28480.2	CsaV3_5G037760.1	CsDOXB3.3	DOXB	DOXB3
AT3G11180.2	CsaV3_5G010170.1	CsDOXA6.5	DOXA	DOXA6
AT3G06300.1	CsaV3_6G005580.1	CsDOXB3.4	DOXB	DOXB3
AT3G19000.1	CsaV3_7G008890.1	CsDOXC21.1	DOXC	DOXC21
AT4G21200.1	CsaV3_1G011060.1	CsGA2ox5	DOXC	DOXC13
AT4G25420.1	CsaV3_3G016600.1	CsGA20ox4	DOXC	DOXC7
AT4G16765.1	CsaV3_3G002550.1	CsDOXC24.1	DOXC	DOXC24
AT4G10490.1	CsaV3_5G001480.1	CsDMR2	DOXC	DOXC38
AT4G25420.1	CsaV3_5G005560.1	CsGA20ox1	DOXC	DOXC7
AT4G35810.2	CsaV3_6G047520.1	CsDOXB1.3	DOXB	DOXB1
AT5G43440.1	CsaV3_2G012920.1	CsD4H1	DOXC	DOXC31
AT5G51810.1	CsaV3_3G016600.1	CsGA20ox4	DOXC	DOXC7
AT5G43440.1	CsaV3_3G012230.1	CsD4H2	DOXC	DOXC31
AT5G07200.1	CsaV3_3G016600.1	CsGA20ox4	DOXC	DOXC7
AT5G05600.1	CsaV3_3G033740.1	CsJOX1	DOXC	DOXC46
AT5G18900.1	CsaV3_3G014000.1	CsDOXB3.1	DOXB	DOXB3
AT5G07480.1	CsaV3_4G004330.1	CsDOXC37.2	DOXC	DOXC37
AT5G51810.1	CsaV3_5G005560.1	CsGA20ox1	DOXC	DOXC7
AT5G05600.1	CsaV3_5G010170.1	CsDOXA6.5	DOXA	DOXA6
AT5G66060.1	CsaV3_6G047520.1	CsDOXB1.3	DOXB	DOXB1
AT5G18900.1	CsaV3_6G005580.1	CsDOXB3.4	DOXB	DOXB3
MELO3C021480.2.1	CsaV3_3G041850.1	CsDOXB3.2	DOXB	DOXB3
MELO3C005397.2.1	CsaV3_3G016600.1	CsGA20ox4	DOXC	DOXC7
MELO3C005801.2.1	CsaV3_5G001480.1	CsDMR2	DOXC	DOXC38
MELO3C021480.2.1	CsaV3_5G037760.1	CsDOXB3.3	DOXB	DOXB3
MELO3C005397.2.1	CsaV3_5G005560.1	CsGA20ox1	DOXC	DOXC7
MELO3C025199.2.1	CsaV3_3G033740.1	CsJOX1	DOXC	DOXC46
MELO3C025199.2.1	CsaV3_5G010170.1	CsDOXA6.5	DOXA	DOXA6
MELO3C034481.2.1	CsaV3_5G015180.1	CsGA2ox7	DOXC	DOXC13
MELO3C026436.2.1	CsaV3_5G037020.1	CsF6'H2	DOXC	DOXC30
MELO3C024783.2.1	CsaV3_2G035650.1	CsDOXC23.1	DOXC	DOXC23
MELO3C021380.2.1	CsaV3_3G014000.1	CsDOXB3.1	DOXB	DOXB3
MELO3C021211.2.1	CsaV3_6G000540.1	CsDOXC17.2	DOXC	DOXC17
MELO3C019735.2.1	CsaV3_6G015400.1	CsACO3	DOXC	DOXC53
MELO3C021380.2.1	CsaV3_6G005580.1	CsDOXB3.4	DOXB	DOXB3
MELO3C019735.2.1	CsaV3_6G037780.1	CsACO4	DOXC	DOXC53
MELO3C022518.2.1	CsaV3_6G005990.1	CsGA20ox3	DOXC	DOXC7
MELO3C035229.2.1	CsaV3_6G009030.1	CsF3H2	DOXC	DOXC28
MELO3C002735.2.1	CsaV3_1G032430.1	CsGA2ox3	DOXC	DOXC12
MELO3C002483.2.1	CsaV3_1G011060.1	CsGA2ox5	DOXC	DOXC13
MELO3C035752.2.1	CsaV3_1G007710.1	CsDOXC20.1	DOXC	DOXC20
MELO3C035771.2.1	CsaV3_1G005340.1	CsGA7ox2	DOXC	DOXC22
MELO3C002735.2.1	CsaV3_6G051750.1	CsGA2ox4	DOXC	DOXC12
MELO3C023378.2.1	CsaV3_2G031670.1	CsGA3ox2	DOXC	DOXC3
MELO3C023635.2.1	CsaV3_7G030210.1	CsGA2ox2	DOXC	DOXC12
MELO3C023381.2.1	CsaV3_7G032850.1	CsDOXC20.4	DOXC	DOXC20
MELO3C023378.2.1	CsaV3_7G032870.1	CsGA3ox1	DOXC	DOXC3
MELO3C029194.2.1	CsaV3_7G027400.1	CsDMR3	DOXC	DOXC38
MELO3C018422.2.1	CsaV3_7G008890.1	CsDOXC21.1	DOXC	DOXC21
MELO3C027119.2.1	CsaV3_1G028300.1	CsDOXC55.2	DOXC	DOXC55
MELO3C030311.2.1	CsaV3_2G031670.1	CsGA3ox2	DOXC	DOXC3
MELO3C023957.2.1	CsaV3_3G032330.1	CsDOXC23.2	DOXC	DOXC23
MELO3C030787.2.1	CsaV3_3G026530.1	CsDOXA6.2	DOXA	DOXA6
MELO3C030548.2.1	CsaV3_3G026700.1	CsDOXA6.3	DOXA	DOXA6
MELO3C009404.2.1	CsaV3_3G036510.1	CsDOXC37.1	DOXC	DOXC37
MELO3C009905.2.1	CsaV3_3G041850.1	CsDOXB3.2	DOXB	DOXB3
MELO3C009162.2.1	CsaV3_3G033740.1	CsJOX1	DOXC	DOXC46
MELO3C009905.2.1	CsaV3_5G037760.1	CsDOXB3.3	DOXB	DOXB3
MELO3C009162.2.1	CsaV3_5G010170.1	CsDOXA6.5	DOXA	DOXA6
MELO3C030548.2.1	CsaV3_7G032850.1	CsDOXC20.4	DOXC	DOXC20
MELO3C030787.2.1	CsaV3_7G030210.1	CsGA2ox2	DOXC	DOXC12
MELO3C004415.2.1	CsaV3_2G003810.1	CsDOXB1.1	DOXB	DOXB1
MELO3C004584.2.1	CsaV3_2G001960.1	CsDOXC27.1	DOXC	DOXC27
MELO3C004619.2.1	CsaV3_2G001540.1	CsACO1	DOXC	DOXC53
MELO3C022978.2.1	CsaV3_2G012920.1	CsD4H1	DOXC	DOXC31
MELO3C003919.2.1	CsaV3_2G009140.1	CsDOXC55.4	DOXC	DOXC55
MELO3C022978.2.1	CsaV3_3G012230.1	CsD4H2	DOXC	DOXC31
MELO3C014437.2.1	CsaV3_6G037780.1	CsACO4	DOXC	DOXC53
MELO3C014437.2.1	CsaV3_6G015400.1	CsACO3	DOXC	DOXC53
MELO3C006438.2.1	CsaV3_2G012920.1	CsD4H1	DOXC	DOXC31
MELO3C006438.2.1	CsaV3_3G012230.1	CsD4H2	DOXC	DOXC31
MELO3C006592.2.1	CsaV3_3G014000.1	CsDOXB3.1	DOXB	DOXB3
MELO3C006644.2.1	CsaV3_3G014440.1	CsLBO1	DOXC	DOXC54
MELO3C006857.2.1	CsaV3_3G016600.1	CsGA20ox4	DOXC	DOXC7
MELO3C031936.2.1	CsaV3_3G000790.1	CsF3H1	DOXC	DOXC28
MELO3C013924.2.1	CsaV3_3G002550.1	CsDOXC24.1	DOXC	DOXC24
MELO3C025434.2.1	CsaV3_3G005490.1	CsDOXC13.1	DOXC	DOXC13
MELO3C006592.2.1	CsaV3_6G005580.1	CsDOXB3.4	DOXB	DOXB3
MELO3C010508.2.1	CsaV3_4G028040.1	CsACO2	DOXC	DOXC53
MELO3C028473.2.1	CsaV3_4G032760.1	CsDOXC52.1	DOXC	DOXC52
MELO3C016225.2.1	CsaV3_4G007200.1	CsDOXA6.4	DOXA	DOXA6
MELO3C016152.2.1	CsaV3_4G007790.1	CsGA2ox1	DOXC	DOXC12
MELO3C025677.2.1	CsaV3_4G007790.1	CsGA2ox1	DOXC	DOXC12
MELO3C017633.2.1	CsaV3_4G004330.1	CsDOXC37.2	DOXC	DOXC37
MELO3C032832.2.1	CsaV3_4G004090.1	CsDOXC17.1	DOXC	DOXC17
MELO3C017675.2.1	CsaV3_4G003800.1	CsDOXB5.1	DOXB	DOXB5
MELO3C017981.2.1	CsaV3_4G000540.1	CsDOXC20.3	DOXC	DOXC20
MELO3C024834.2.1	CsaV3_4G009640.1	CsDOXC37.3	DOXC	DOXC37
MELO3C024857.2.1	CsaV3_4G008570.1	CsDMR1	DOXC	DOXC38
MELO3C007132.2.1	CsaV3_1G032430.1	CsGA2ox3	DOXC	DOXC12
MELO3C007611.2.1	CsaV3_6G043860.1	CsDOXB6.1	DOXB	DOXB6
MELO3C007943.2.1	CsaV3_6G047520.1	CsDOXB1.3	DOXB	DOXB1
MELO3C007131.2.1	CsaV3_6G051750.1	CsGA2ox4	DOXC	DOXC12
MELO3C032882.2.1	CsaV3_6G051310.1	CsDOXC52.4	DOXC	DOXC52
MELO3C007174.2.1	CsaV3_6G051290.1	CsDOXC52.2	DOXC	DOXC52
MELO3C007425.2.1	CsaV3_6G048630.1	CsACO5	DOXC	DOXC53
MELO3C033125.2.1	CsaV3_6G041260.1	CsGA20ox2	DOXC	DOXC7

## Sheet: Table S3
Table S3. Motif identification of the Cucumber 2OGD family
Motif	Consensus sequence	Best Possible Match	E-value	Sites	Length
1		NIGDLLZVLSNGRYKSVEHRV	1.1e-836	77	21
2		JREACEEWGFFQVINHGVPEE	9.8e-769	75	21
3		VNYYPPCPQPELTLGLGPHTD	4.6e-674	62	21
4		YSKEMKKLGEKLLELJSESLGLEKEYL	1.1e-423	77	27
5		VGGLQVLKDGKW	7.8e-260	73	12
6		VVNSEKERISIAYFYNPSGDA	1.9e-350	72	21
7		IGPLKELVSEENPPLYREFTF	2.2e-257	51	21
8		VRRFFEQDTEEKKQYYTRDNTKPFIYNSNFDLYTAKTANWRDTLRLVCAP	8.4e-251	15	50
9		JEEVEKETKEFFGLPLEEKLK	3.9e-200	57	21
10		PSFJTILLQDD	8.5e-195	72	11
11		PLSKLDENFDRPSELKAFDDTKAGVKGLVDAGITEIPRIFY	1.6e-183	10	41
12		DVPPVPGAFVV	8.9e-165	70	11
13		LSIPVIDLSKJDAGS	2.1e-163	87	15
14		IQILRYEVGQKYEPHFDYFVDKYNIKRGGHRIATVLMYLSD	7.3e-136	8	41
15		LERNPNLWPQNPPKFREVVEE	4e-130	38	21

## Sheet: Table S4
Table S4. Analysis of the cis-acting elements of the promoter in the Cucumber 2OGD family
	Abiotic and biotic stresses									Phytohormone responsive									Plant growth and development
Gene_ID	ARE	LTR	MYB	MYC	W box	STRE	TC-rich repeats	DRE core	MBS	ABRE	ERE	GARE-motif	TCA-element	TGA-element	as-1	P-box	AuxRR-core	TGACG-motif	AE-box	G-box	I-box	TCT-motif	chs-CMA1a	A-box	GATA-motif	MRE	Sp1
CsD4H2	1	0	9	2	0	1	1	2	2	1	0	0	0	0	2	0	1	2	0	1	0	0	1	1	0	2	0
CsD4H3	5	0	6	3	2	3	1	0	1	2	4	1	2	0	1	1	0	1	3	2	1	0	0	0	0	0	0
CsD4H4	0	1	8	3	0	1	0	0	0	0	6	0	0	0	1	0	1	1	0	0	0	0	0	0	0	1	0
CsD4H5	2	0	6	4	2	1	2	0	1	2	3	0	1	2	3	0	1	3	2	1	0	1	0	0	2	0	0
CsD4H7	2	0	7	3	0	2	1	0	3	3	0	0	2	0	0	0	0	0	0	3	0	2	0	0	1	0	0
CsD4H6	5	1	6	1	0	3	1	0	1	5	3	1	2	1	0	1	0	0	1	5	0	0	0	0	1	1	0
CsD4H8	6	0	16	9	1	4	0	0	1	4	1	0	0	0	0	0	0	0	0	5	1	2	1	0	0	0	0
CsD4H9	1	0	5	4	0	1	2	0	1	0	1	0	1	0	0	0	0	0	1	1	0	2	0	0	0	0	0
CsD4H1	1	2	8	7	0	2	0	1	3	3	1	0	0	1	3	0	0	3	0	4	1	0	0	0	1	0	1
CsF6H2	3	0	3	4	0	1	0	0	0	1	2	0	3	0	1	1	0	1	0	1	0	1	0	0	0	1	0
CsF6H1	1	0	6	3	0	2	1	0	0	4	2	0	0	1	3	0	0	3	1	3	1	2	0	0	1	0	0
CsDMR3	5	0	5	6	0	1	0	0	1	11	1	0	0	0	1	0	0	1	0	4	0	1	0	0	1	1	0
CsDMR4	1	0	10	2	2	0	0	0	1	1	2	0	1	1	1	0	0	1	0	2	0	1	0	0	0	0	0
CsDMR6	2	1	8	0	0	0	0	0	0	5	0	2	0	1	0	1	0	0	0	3	3	0	3	0	2	0	0
CsDMR5	1	0	3	2	0	1	0	0	0	1	5	0	2	0	0	0	0	0	1	1	0	2	0	0	1	3	0
CsDMR1	1	2	7	4	0	2	0	1	1	5	2	1	3	0	2	2	0	2	1	3	0	0	0	0	0	0	0
CsDMR2	2	0	14	6	0	1	0	1	1	0	1	1	2	0	2	0	0	2	1	0	0	2	0	0	0	0	0
CsDOXC37.3	0	1	8	3	0	3	0	0	0	7	2	0	0	0	3	1	0	3	0	6	0	0	1	1	0	1	0
CsDOXC37.1	5	1	4	6	0	2	0	0	1	0	1	0	2	0	1	0	0	1	0	0	0	1	0	0	0	0	0
CsDOXC37.2	3	0	3	6	0	2	0	0	0	5	1	0	1	0	0	0	1	0	1	4	0	1	0	2	0	2	0
CsACO4	2	0	6	5	0	4	2	0	1	9	1	0	1	0	1	0	0	1	0	5	0	2	0	0	0	0	0
CsACO5	0	1	8	5	0	2	2	0	0	3	1	0	0	0	0	0	0	0	0	4	2	0	0	0	1	1	0
CsACO3	0	0	4	3	0	2	2	1	0	0	2	0	3	1	2	1	0	2	0	0	0	1	0	1	2	0	0
CsACO2	4	0	8	3	2	4	1	1	1	0	1	0	2	0	1	1	0	1	0	0	1	4	0	0	2	0	0
CsACO1	2	0	4	5	0	3	0	0	0	1	1	0	1	0	1	3	0	1	0	2	0	2	0	0	0	1	0
CsJOX1	1	0	6	4	0	2	0	1	2	3	1	1	2	1	0	0	0	0	0	1	0	2	0	0	0	1	0
CsJOX2	3	0	4	4	0	2	1	1	1	4	0	0	0	1	0	0	0	0	1	4	1	2	0	0	1	0	0
CsDOXC45.1	0	0	5	4	1	5	3	0	0	9	2	0	1	0	1	0	0	1	0	5	1	0	0	0	0	1	0
CsFLS1	2	1	5	5	0	2	0	0	0	3	4	1	1	1	0	0	0	0	1	1	0	1	1	0	0	0	0
CsDOXC55.1	3	0	4	3	1	2	1	0	0	0	0	0	0	2	1	0	0	1	0	0	1	1	0	0	2	2	0
CsDOXC55.3	3	0	6	5	0	0	1	0	1	1	2	0	0	0	1	0	0	1	1	1	0	4	0	1	0	2	0
CsDOXC55.2	2	0	6	5	2	3	0	0	0	0	0	0	0	0	0	0	0	0	0	0	0	0	1	1	1	0	0
CsDOXC55.4	0	0	4	5	0	1	0	0	1	0	5	0	3	0	0	1	0	0	0	0	0	0	0	0	0	2	0
CsLBO1	1	1	4	3	1	3	2	0	1	11	1	0	1	0	0	0	0	0	1	4	0	3	0	0	0	1	0
CsDOXC52.2	0	1	5	5	1	0	0	0	0	0	0	0	4	0	0	1	0	0	1	0	0	4	1	0	1	3	0
CsDOXC52.1	5	0	4	6	0	0	1	0	0	4	2	0	1	0	0	2	0	0	1	3	0	1	0	0	0	1	0
CsDOXC52.3	1	0	12	5	3	0	2	0	0	0	3	0	0	0	1	0	0	1	0	0	1	0	1	0	1	0	0
CsDOXC52.4	4	1	13	6	0	0	1	0	3	0	0	1	3	0	1	0	0	1	3	0	2	0	0	0	0	1	0
CsF3H1	3	0	4	3	2	8	1	0	0	1	0	0	1	1	1	0	0	1	1	1	0	1	0	2	1	0	0
CsF3H2	4	0	4	3	0	2	0	0	0	0	1	1	0	0	0	0	0	0	0	0	1	2	0	0	0	1	0
CsGA2ox5	0	0	5	7	1	5	0	2	0	8	0	0	2	0	2	0	1	2	0	3	0	0	0	0	2	1	0
CsGA2ox7	0	0	3	7	2	2	0	0	0	0	1	0	3	0	4	3	0	4	0	0	0	1	0	0	2	1	0
CsDOXC13.1	3	0	8	4	0	0	1	0	1	0	0	0	0	0	0	0	0	0	1	0	0	2	0	0	0	2	0
CsGA20ox1	4	0	5	9	2	3	0	0	0	3	2	0	0	1	0	1	0	0	1	2	0	1	2	0	1	0	0
CsGA20ox3	0	1	6	7	0	1	1	0	0	0	1	0	3	0	3	0	0	3	0	0	0	2	1	0	1	0	0
CsGA20ox4	0	1	21	4	1	2	1	2	3	0	5	0	0	1	1	1	0	1	0	0	0	0	0	0	0	0	0
CsGA20ox5	3	1	3	5	0	4	2	0	0	2	2	0	2	1	1	1	2	1	0	3	0	2	0	0	1	1	0
CsGA20ox2	2	1	2	3	0	0	0	0	1	6	2	0	2	0	1	0	0	1	0	2	0	2	0	0	1	0	0
CsGA2ox3	0	0	4	3	0	0	1	0	0	9	0	0	0	0	2	0	1	2	0	5	2	0	2	0	1	0	0
CsGA2ox4	5	0	4	4	0	0	0	0	0	4	2	0	0	1	1	0	0	1	4	3	0	2	1	0	1	0	0
CsGA2ox1	3	0	1	5	1	2	1	0	0	0	0	0	0	2	0	2	0	0	0	0	1	0	0	1	1	2	0
CsGA2ox2	2	0	5	1	1	1	0	0	0	3	6	0	0	0	0	0	0	0	0	1	0	1	0	0	0	0	0
CsGA3ox2	1	0	6	4	0	1	0	0	0	1	3	0	2	0	0	0	0	0	0	1	0	1	0	0	0	1	0
CsGA3ox4	3	0	7	3	0	1	0	0	0	1	3	0	0	0	0	0	0	0	2	1	0	0	0	1	0	2	0
CsDOXC3.2	1	0	6	4	1	1	1	0	0	5	1	0	1	1	0	0	0	0	3	3	0	3	0	0	1	0	0
CsDOXC3.1	2	0	7	5	0	1	0	0	0	4	1	0	1	0	6	1	0	6	0	3	0	2	0	0	0	0	0
CsGA3ox1	2	0	5	5	1	3	2	0	0	0	3	0	0	0	0	1	0	0	0	0	0	1	0	0	1	0	0
CsGA3ox3	3	0	2	1	0	1	0	0	0	2	0	0	1	0	0	1	0	0	0	2	0	3	0	0	0	0	0
CsDOXC23.1	0	0	4	6	1	3	1	0	0	3	2	1	0	1	0	1	0	0	0	4	0	1	0	0	1	2	0
CsDOXC23.2	1	1	11	5	0	1	0	0	1	5	1	0	1	3	2	0	0	2	2	5	1	1	0	0	0	0	0
CsDOXC27.1	0	0	3	1	0	2	0	0	0	0	4	0	4	0	1	1	0	1	1	0	0	1	0	0	0	0	0
CsGA7ox2	1	0	5	2	1	1	0	0	2	0	0	0	2	0	1	2	0	1	1	0	0	0	0	0	1	0	0
CsGA7ox1	5	0	6	4	2	1	0	0	2	2	2	1	7	2	2	0	0	2	0	3	0	0	0	0	1	1	0
CsDOXC21.4	4	0	4	5	1	4	1	0	0	1	4	0	1	0	0	0	0	0	0	1	0	1	1	0	0	0	0
CsDOXC21.3	5	1	2	4	0	2	0	1	0	1	1	1	1	0	0	1	0	0	0	1	0	1	0	1	0	1	0
CsDOXC21.1	0	0	7	1	0	1	0	1	1	0	4	0	0	0	2	0	0	2	0	0	0	0	0	0	0	0	0
CsDOXC21.2	2	0	5	3	2	2	0	0	1	0	1	0	1	0	0	0	0	0	3	0	0	3	0	0	1	0	1
CsDOXC17.1	1	1	8	2	2	0	1	0	0	5	3	0	1	1	2	0	0	2	1	3	2	1	0	0	1	0	0
CsDOXC17.2	4	1	8	6	4	0	2	0	0	2	1	0	4	0	1	0	0	1	0	2	0	3	0	0	0	0	0
CsDOXC20.5	1	0	9	2	1	0	0	0	0	0	1	1	4	0	0	0	0	0	1	0	0	1	0	0	0	1	0
CsDOXC20.4	3	0	2	1	0	0	1	0	0	3	6	0	3	1	1	0	0	1	0	3	0	0	0	0	2	0	0
CsDOXC20.3	1	0	5	3	0	2	0	0	1	0	1	0	2	0	1	0	0	1	1	0	0	0	0	0	0	0	0
CsDOXC20.1	3	0	1	2	2	0	1	0	1	1	2	0	0	0	0	0	0	0	0	1	1	3	0	1	1	1	0
CsDOXC20.2	3	0	0	2	0	1	2	0	0	5	3	0	3	0	1	0	0	1	0	5	0	1	0	1	0	1	0
CsDOXC24.1	2	1	4	4	0	1	0	0	2	11	4	0	2	0	0	1	0	0	0	8	1	1	2	0	0	0	0
CsDOXB6.1	2	1	5	5	1	0	1	0	0	0	1	0	0	0	1	0	0	1	3	0	0	1	0	0	0	2	1
CsDOXB1.2	4	0	6	4	2	1	1	0	0	0	5	0	2	0	3	0	0	3	0	0	0	1	0	0	0	0	0
CsDOXB1.3	1	0	1	0	0	1	1	0	1	0	10	0	1	0	1	0	0	1	1	0	0	1	1	0	0	0	0
CsDOXB1.1	2	1	18	3	1	1	0	0	0	0	2	0	1	0	0	0	0	0	2	0	0	2	0	0	1	0	0
CsDOXB5.1	2	1	7	2	0	3	1	0	0	1	3	1	0	0	1	0	0	1	0	2	0	3	1	0	0	1	0
CsDOXB3.1	3	0	9	4	0	1	0	0	1	5	2	0	2	0	1	0	0	1	0	4	0	2	0	0	0	0	0
CsDOXB3.4	3	0	7	3	0	1	1	0	0	4	3	0	1	1	1	0	1	1	0	6	0	0	0	0	0	0	0
CsDOXB3.2	3	0	6	6	0	0	0	0	1	1	6	0	0	0	0	0	0	0	1	2	1	1	0	0	2	0	0
CsDOXB3.3	1	0	5	4	0	0	0	0	0	0	2	0	0	1	1	1	0	1	2	0	1	0	0	0	1	0	1
CsDOXA6.4	1	3	10	4	0	1	0	1	1	5	1	0	0	0	4	0	0	4	0	4	1	0	1	1	0	0	1
CsDOXA6.1	4	0	5	3	0	3	1	0	0	1	2	1	0	0	1	0	0	1	0	1	0	0	0	0	0	0	0
CsDOXA6.2	2	0	6	5	0	1	2	0	0	3	3	0	1	0	0	0	0	0	0	2	0	3	0	0	1	0	0
CsDOXA6.3	2	0	8	4	1	0	0	0	1	0	3	0	0	0	1	0	0	1	0	1	0	1	0	0	1	0	0
CsDOXA6.5	0	0	0	1	0	1	1	0	0	2	3	0	2	1	2	0	0	2	2	1	0	3	0	0	0	1	0

## Sheet: Table S5
Table S5. RNA-seq datasets from NCBI SRA for cucumber across organ types.
Class	Gene_ID	Gene_Name	TPM
			Ovary	Ovary_fertilized	Ovary_unfertilized	Root	Stem	Leaf	Male	Tendril	Tendril_base	Female
I	CsaV3_4G007200.1	CsDOXA6.4	59.2014	43.768	44.2847	62.4925	46.8047	43.2955	43.3618	31.3837	40.9192	56.9597
	CsaV3_4G004090.1	CsDOXC17.1	27.6433	27.1931	41.9385	35.4717	31.5314	16.9375	42.4084	32.9671	30.6463	42.3944
	CsaV3_6G047520.1	CsDOXB1.3	41.275	35.4059	31.9735	50.3917	40.361	26.6072	54.1729	63.9908	65.147	40.1248
	CsaV3_5G037760.1	CsDOXB3.3	45.2869	37.3393	38.4615	63.0525	49.0917	37.312	46.8334	124.828	136.946	42.7306
	CsaV3_6G048630.1	CsACO5	16.7812	11.6331	45.7999	581.752	22.0269	6.1484	553.002	299.23	268.153	185.257
	CsaV3_6G015400.1	CsACO3	32.7911	39.1389	277.459	4.21849	68.1466	91.1437	294.219	1003.22	1125.66	223.622
II	CsaV3_2G012920.1	CsD4H1	48.4071	54.1734	437.071	4.58039	5.13196	24.8057	47.3712	0.0274517	0.0290133	34.808
	CsaV3_4G008570.1	CsDMR1	3.24508	2.90009	12.6213	7.69616	11.7356	20.527	15.4479	38.5622	44.7115	45.162
	CsaV3_3G012280.1	CsD4H7	7.65655	5.28238	7.73746	2.67059	13.2762	15.3402	8.09668	25.6087	27.7325	16.2405
	CsaV3_3G012300.1	CsD4H9	8.60864	4.13805	3.66083	7.82065	8.61091	6.0667	15.878	38.6531	41.5549	17.512
	CsaV3_1G007710.1	CsDOXC20.1	5.95751	5.77469	12.3765	8.43033	3.87611	9.55445	13.6077	12.4169	15.9908	8.93673
	CsaV3_2G001960.1	CsDOXC27.1	5.38613	6.36499	15.5519	31.6795	8.36643	3.62169	9.40052	11.424	13.5385	7.52589
	CsaV3_6G043860.1	CsDOXB6.1	12.9688	9.11991	8.99841	11.1984	15.2407	6.83349	17.1368	22.8484	25.0567	17.0496
	CsaV3_2G035650.1	CsDOXC23.1	16.3645	11.9589	13.9589	17.318	14.4388	17.2214	15.3208	23.721	25.8771	14.8423
	CsaV3_6G005580.1	CsDOXB3.4	11.2397	11.233	10.3905	19.8555	23.7533	9.59933	19.3446	41.6428	43.6773	16.4008
	CsaV3_3G014000.1	CsDOXB3.1	10.9512	9.46315	7.12685	15.5867	15.4378	4.79658	6.25793	18.3673	20.723	6.78018
	CsaV3_3G032330.1	CsDOXC23.2	13.7795	12.9705	16.8117	12.1736	14.0801	10.2491	16.0889	15.9716	14.1757	15.3616
	CsaV3_4G003800.1	CsDOXB5.1	11.4885	8.6747	10.776	10.7405	8.96262	7.51529	11.7364	12.7367	11.0522	11.2
	CsaV3_6G009030.1	CsF3H2	18.8619	10.2834	29.6984	0.715688	24.15	47	8.92777	9.42096	9.57784	6.93162
	CsaV3_6G037780.1	CsACO4	14.5446	8.35563	69.0983	20.035	37.6285	9.93166	39.363	13.7998	16.8351	45.6428
	CsaV3_4G007210.1	CsDOXC45.1	22.2675	17.1868	13.2828	26.1721	29.5821	22.4907	15.1916	9.0057	9.20535	17.7668
	CsaV3_3G012240.1	CsD4H3	36.0515	23.4154	21.7252	18.7542	15.6798	26.1382	17.2913	24.4566	20.4587	22.0734
	CsaV3_5G037020.1	CsF6H2	31.8732	27.6549	26.8798	7.98136	43.739	31.6141	38.806	15.2238	17.3392	33.7835
III	CsaV3_7G027400.1	CsDMR3	0	0.453358	7.22774	0	0	0	0	0	0	0
	CsaV3_7G027450.1	CsDMR6	0.644791	0.742099	4.45339	1.04739	0	0.0293103	0.171692	0.0700805	0.150225	0.141209
	CsaV3_7G032860.1	CsDOXC20.5	0	0	0	2.54253	0	0.0743705	0.0355877	0	0	0
	CsaV3_7G027420.1	CsDMR5	0	0	0.0919279	0	0	0	0.761072	0	0	0
	CsaV3_1G007730.1	CsDOXC20.2	0.0862392	0.0809651	0.475922	0.548914	0	0.0672944	0.549015	0.0383024	0	0.387145
	CsaV3_4G028040.1	CsACO2	0.126226	0.36324	0.158432	0.76578	0.392739	0.270083	1.34498	0.0411287	0.0432887	0.759413
	CsaV3_6G031260.1	CsGA20ox5	0	0	0.0440491	0	0.0300475	0	0.0267031	0.835429	1.20655	0
	CsaV3_3G033740.1	CsJOX1	0.0398283	0	0	0.12783	0	1.4082	0.184569	0.0379037	0.0807564	0.695241
	CsaV3_5G010170.1	CsDOXA6.5	0.0296795	0	0	0.688837	0	0.0468697	0	0	0	0.0674944
	CsaV3_3G036510.1	CsDOXC37.1	0	0	0.127902	1.5317	0.030198	0.0269397	0	0	0	0.0768544
	CsaV3_3G026700.1	CsDOXA6.3	0	0	0	1.18002	0	0.025521	0.0728714	0	0.0923061	0.1191
	CsaV3_1G005340.1	CsGA7ox2	0	0	0	1.51591	0	0.03997	0	0	0	0
	CsaV3_1G028310.1	CsDOXC55.3	0.131443	0.12269	0.248925	0.695492	0.0537562	0.0745347	0.0740437	0	0.0322536	0
	CsaV3_7G032900.1	CsGA3ox3	0	0	0	0	0.0325413	0	0	0	0	0
	CsaV3_7G032890.1	CsDOXC3.2	0	0	0	0	0	0	0	0	0	0
	CsaV3_7G032880.1	CsDOXC3.1	0	0	0	0	0	0	0	0	0	0
	CsaV3_7G027410.1	CsDMR4	0	0	0	0	0	0	0	0	0	0
	CsaV3_7G008890.1	CsDOXC21.1	0.118869	0.1123	0.203302	0.126654	0	0.271928	0.0907306	0.232793	0.204936	0.0897757
	CsaV3_3G026530.1	CsDOXA6.2	0.0718757	0	0.137975	0.116177	0	0.0282366	0	0	0	0
	CsaV3_3G002550.1	CsDOXC24.1	0	0	0	0	0	0	0	0	0	0
	CsaV3_2G031680.1	CsGA3ox4	0	0	0.103471	0.129994	0	0	0.157832	0	0	0
	CsaV3_1G028070.1	CsDOXA6.1	0.0816134	0.142437	0	0.0921922	0	0	0	0	0	0.0602389
	CsaV3_2G003810.1	CsDOXB1.1	0	0.377385	0	0	0	0	0.0807507	0	0	0
	CsaV3_3G040220.1	CsF6H1	0.81603	0.59528	0.363355	1.02196	0.801551	0.902539	1.5979	1.7635	2.72084	0.635779
	CsaV3_3G014440.1	CsLBO1	1.58842	1.28922	0.498824	4.26799	0.98805	1.70333	0.246103	1.26066	1.50827	0.589564
	CsaV3_4G004330.1	CsDOXC37.2	1.79892	1.66967	1.77633	1.7109	1.55141	0.516419	0.179914	0.664867	0.423946	0.423846
	CsaV3_2G009140.1	CsDOXC55.4	1.05203	1.96635	1.4843	1.60614	0.333851	0.497334	1.23601	0.536389	0.316991	0.622106
	CsaV3_3G016600.1	CsGA20ox4	0.495317	0.638032	0.321626	0.279548	0.856963	0.0292838	0.0286314	0	0	0.47823
IV	CsaV3_3G012290.1	CsD4H8	0.539249	0.252489	1.7652	4.92236	3.1318	2.6264	8.3055	22.2473	21.0367	9.31863
	CsaV3_4G009640.1	CsDOXC37.3	0.990596	0.408616	3.12686	0.231084	12.6246	3.34798	12.7138	12.2805	17.1379	10.6448
	CsaV3_5G001480.1	CsDMR2	7.06622	3.1088	4.29336	2.36388	5.99221	3.81176	1.40652	13.6585	13.1895	19.3958
	CsaV3_5G015180.1	CsGA2ox7	3.77506	3.12132	5.26037	4.16445	2.07365	3.31134	3.78265	5.48566	6.3702	3.17663
	CsaV3_6G051750.1	CsGA2ox4	6.09253	5.03108	7.26144	9.85348	7.6537	5.58744	2.7962	10.4422	9.7622	4.34439
	CsaV3_7G008930.1	CsDOXC21.4	5.90853	5.87708	19.4187	0	0.709791	29.7393	5.1645	5.0056	5.00641	5.27161
	CsaV3_3G000790.1	CsF3H1	14.6997	10.8518	15.6312	0.671005	3.3711	3.48211	1.49729	8.83103	7.76158	2.00379
	CsaV3_3G012230.1	CsD4H2	4.35163	2.97866	2.85252	0.0455026	0.895438	5.73115	0.837678	5.20128	6.81977	2.54123
	CsaV3_2G001540.1	CsACO1	0.891464	1.23548	1.42463	315.069	5.59537	2.05536	16.3143	2.74632	2.00208	24.1073
	CsaV3_1G028060.1	CsDOXC55.1	4.34074	6.13228	23.2429	13.7045	4.77041	8.54423	4.93465	1.48395	2.52776	8.42477
	CsaV3_3G012250.1	CsD4H4	9.87227	7.32925	17.242	25.5653	2.93097	8.9827	16.092	2.45984	3.15197	20.5062
	CsaV3_4G000540.1	CsDOXC20.3	1.62041	3.86625	42.0526	83.8702	1.08962	0.243881	10.7529	0.453473	0.483028	11.9193
	CsaV3_4G032760.1	CsDOXC52.1	7.06272	6.77053	4.69009	35.3275	0.383949	0.162507	7.01422	0.196021	0.208713	2.72126
	CsaV3_5G010180.1	CsJOX2	2.25362	0.640472	2.20716	12.3928	0.927872	3.29035	11.4181	0.469149	0.801801	9.46062
	CsaV3_5G005560.1	CsGA20ox1	13.4567	10.8197	4.13224	42.2424	6.19933	14.4566	0.252843	0.258697	0.388383	0.519837
	CsaV3_7G008910.1	CsDOXC21.3	8.00341	7.62212	5.21413	6.5858	1.12581	28.0705	4.06069	1.52453	1.31379	4.12526
	CsaV3_3G041850.1	CsDOXB3.2	5.19076	4.69353	9.13939	1.2244	0.558944	0.627974	2.50067	0.299044	0.25434	3.18863
	CsaV3_6G041260.1	CsGA20ox2	4.11955	3.55015	4.34559	0.970204	0.283709	5.02629	2.60184	0.410834	0.0467708	1.434
	CsaV3_6G051300.1	CsDOXC52.3	1.04585	1.91752	3.52	0.645278	3.02	1.40051	0.306121	1.83593	1.62351	0.857603
	CsaV3_4G007790.1	CsGA2ox1	0.638954	0.428787	15.5647	1.79149	3.24	0.86316	0.0801802	1.95101	2.3623	1.10944
	CsaV3_6G003560.1	CsFLS1	3.9684	2.53196	6.06404	0	2.35407	4.39224	0.711883	4.3744	3.09243	1.00349
	CsaV3_3G012270.1	CsD4H6	1.84296	1.06629	2.31962	10.5866	0.544699	4.24819	0.10335	3.45365	3.08607	2.7881
	CsaV3_7G008900.1	CsDOXC21.2	2.99173	3.16843	25.9893	14.4175	1.51112	3.22338	1.6074	1.49477	1.54772	2.52039
V	CsaV3_3G005490.1	CsDOXC13.1	0.474884	0.184533	0.145119	0.209051	0.246579	0	0.178651	7.31663	5.77856	0.320762
	CsaV3_1G011060.1	CsGA2ox5	0.498024	0.275299	1.35626	1.88799	2.30856	3.73699	0.247335	8.00658	9.37083	2.25896
	CsaV3_1G032430.1	CsGA2ox3	0.705762	0.378366	0.343416	1.96569	2.33698	0.656734	0.268213	1.40997	2.03692	0.714856
	CsaV3_3G012260.1	CsD4H5	0.567468	0.393173	0.834289	4.6936	0.996153	0.499761	0.0584264	1.7106	1.97989	1.96126
	CsaV3_6G005990.1	CsGA20ox3	0	0	0	30.1264	0	0	0	0.0972248	0.138683	0.0261922
	CsaV3_2G031670.1	CsGA3ox2	0	0	0	21.3134	0	0	0.795913	0	0	0
	CsaV3_2G003820.1	CsDOXB1.2	0.332205	0.751934	0.158853	11.0758	0.111867	0.331624	0.25929	0.0403917	0.215311	0.0947406
	CsaV3_7G030210.1	CsGA2ox2	0.0360685	0.0337745	0.0449596	10.7738	0	0	0.0272698	0	0	0
	CsaV3_7G032850.1	CsDOXC20.4	0	0	0	10.7874	0	0	0	0	0	0
	CsaV3_1G005350.1	CsGA7ox1	1.64188	1.03935	2.34897	5.98932	0.422764	0.630184	2.2508	1.03926	1.17238	0.516564
	CsaV3_6G051310.1	CsDOXC52.4	0.479685	0.343375	4.23042	2.18747	0.281631	0.644641	0.468464	0.556706	0.710245	0.684648
	CsaV3_1G028300.1	CsDOXC55.2	0.894695	0.678081	1.98431	7.12114	0.144025	0.469518	0.143447	0.296637	0.252648	0.455092
	CsaV3_6G000540.1	CsDOXC17.2	2.05274	1.21499	0.483367	10.0183	0.168724	0.359063	0.0334363	0.0685025	0	0.263489
	CsaV3_6G051290.1	CsDOXC52.2	4.38393	0.928219	0.80813	3.63928	2.24807	7.2391	1.66265	0.0304672	0.09729	2.34801
	CsaV3_7G032870.1	CsGA3ox1	0.664099	0.0298093	0	0.61601	7.90772	0.446219	0.995393	1.32933	1.02854	5.20563

## Sheet: Table S6
Table S6. Predictive transcription factor analysis of Cs2OGD gene family.
Pattern_Name	Family	Gene_ID	Start	Stop	Strand	Score	p-value	q-value	Matched sequence
Cucsa.026600	BBR-BPC	CsGA2ox1	1683	1706	-	42.0312	6.46e-15	2.15e-09	GAGAGAGAGAGAGAGAGAGAGAGT
Cucsa.026600	BBR-BPC	CsGA3ox1	646	669	-	40.6406	3.51e-14	2.6e-09	GATAGAGAGAGAGAGAGAGAGAGA
Cucsa.026600	BBR-BPC	CsGA2ox1	1687	1710	-	40.6406	3.51e-14	2.6e-09	GATAGAGAGAGAGAGAGAGAGAGA
Cucsa.159750	BBR-BPC	CsGA3ox1	645	665	+	40.7945	4.14e-14	4.62e-09	ctctctctctctctctctctc
Cucsa.159750	BBR-BPC	CsGA2ox1	1684	1704	+	40.7945	4.14e-14	4.62e-09	ctctctctctctctctctctc
Cucsa.159750	BBR-BPC	CsGA2ox1	1686	1706	+	40.7945	4.14e-14	4.62e-09	ctctctctctctctctctctc
Cucsa.026600	BBR-BPC	CsGA2ox1	1685	1708	-	39.9688	5.01e-14	2.6e-09	TAGAGAGAGAGAGAGAGAGAGAGA
Cucsa.026600	BBR-BPC	CsGA3ox1	650	673	-	39.8281	5.74e-14	2.6e-09	GAGAGATAGAGAGAGAGAGAGAGA
Cucsa.026600	BBR-BPC	CsGA2ox1	1691	1714	-	39.8281	5.74e-14	2.6e-09	GAGAGATAGAGAGAGAGAGAGAGA
Cucsa.026600	BBR-BPC	CsGA3ox1	648	671	-	39.6094	6.96e-14	2.6e-09	GAGATAGAGAGAGAGAGAGAGAGA
Cucsa.026600	BBR-BPC	CsGA2ox1	1689	1712	-	39.6094	6.96e-14	2.6e-09	GAGATAGAGAGAGAGAGAGAGAGA
Cucsa.026600	BBR-BPC	CsGA2ox1	1681	1704	-	39.5625	7.04e-14	2.6e-09	GAGAGAGAGAGAGAGAGAGAGTGG
Cucsa.026600	BBR-BPC	CsDOXB3.4	1940	1963	-	39.3906	7.89e-14	2.62e-09	GAGAGGGAGAGAGAGAGAGAGAGT
Cucsa.159750	BBR-BPC	CsGA3ox1	647	667	+	38.4521	1.47e-13	9.83e-09	ctctctctctctctctctcta
Cucsa.159750	BBR-BPC	CsGA2ox1	1688	1708	+	38.4521	1.47e-13	9.83e-09	ctctctctctctctctctcta
Cucsa.159750	BBR-BPC	CsGA2ox1	1682	1702	+	37.726	1.88e-13	1.05e-08	cactctctctctctctctctc
Cucsa.026600	BBR-BPC	CsGA3ox1	642	665	-	37.5625	3.51e-13	1.06e-08	GAGAGAGAGAGAGAGAGAGAGTTA
Cucsa.026600	BBR-BPC	CsDOXB3.4	1942	1965	-	37.2969	4.64e-13	1.28e-08	GCGAGAGGGAGAGAGAGAGAGAGA
Cucsa.159750	BBR-BPC	CsDOXB3.4	1941	1961	+	36.9863	6.11e-13	2.92e-08	ctctctctctctctctccctc
Cucsa.026600	BBR-BPC	CsGA3ox1	644	667	-	36.4531	8.84e-13	2.26e-08	TAGAGAGAGAGAGAGAGAGAGAGT
Cucsa.159750	BBR-BPC	CsGA3ox1	651	671	+	35.9452	1.26e-12	4.17e-08	ctctctctctctctctatctc
Cucsa.159750	BBR-BPC	CsGA2ox1	1692	1712	+	35.9452	1.26e-12	4.17e-08	ctctctctctctctctatctc
Cucsa.159750	BBR-BPC	CsGA3ox1	653	673	+	35.9315	1.49e-12	4.17e-08	ctctctctctctctatctctc
Cucsa.159750	BBR-BPC	CsGA2ox1	1694	1714	+	35.9315	1.49e-12	4.17e-08	ctctctctctctctatctctc
Cucsa.159750	BBR-BPC	CsDOXB3.4	1943	1963	+	35.9315	1.49e-12	4.17e-08	ctctctctctctctccctctc
Cucsa.159750	BBR-BPC	CsGA3ox1	649	669	+	34.9315	2.89e-12	6.91e-08	ctctctctctctctctctatc
Cucsa.159750	BBR-BPC	CsGA2ox1	1690	1710	+	34.9315	2.89e-12	6.91e-08	ctctctctctctctctctatc
Cucsa.026600	BBR-BPC	CsGA3ox1	658	681	-	34.4531	3.46e-12	8.22e-08	GAGAGATAGAGAGATAGAGAGAGA
Cucsa.026600	BBR-BPC	CsGA3ox1	652	675	-	34.1875	4.16e-12	9.22e-08	TAGAGAGATAGAGAGAGAGAGAGA
Cucsa.159750	BBR-BPC	CsGA3ox1	643	663	+	34.2055	4.36e-12	9.75e-08	aactctctctctctctctctc
Cucsa.026600	BBR-BPC	CsGA3ox1	656	679	-	33.9219	5.07e-12	1.05e-07	GAGATAGAGAGATAGAGAGAGAGA
Cucsa.026600	BBR-BPC	CsDOXB3.4	1938	1961	-	33.7969	5.56e-12	1.09e-07	GAGGGAGAGAGAGAGAGAGAGTTA
Cucsa.353140	TALE	CsACO3	1148	1167	-	27.4267	2.18e-11	3.81e-06	CCCCCCCCCCCCCCCCCCCC
Cucsa.353140	TALE	CsACO3	1149	1168	-	27.4267	2.18e-11	3.81e-06	CCCCCCCCCCCCCCCCCCCC
Cucsa.124410	ARF	CsDMR1	600	620	-	32.175	2.25e-11	7.62e-06	TTCGCGTTTTTGGCGGGAAAA
Cucsa.159750	BBR-BPC	CsGA2ox1	1680	1700	+	31.9041	2.47e-11	5.18e-07	accactctctctctctctctc
Cucsa.026600	BBR-BPC	CsGA3ox1	654	677	-	31.625	2.48e-11	4.58e-07	GATAGAGAGATAGAGAGAGAGAGA
Cucsa.232520	B3	CsDMR1	600	620	-	31.8971	2.67e-11	9.23e-06	TTCGCGTTTTTGGCGGGAAAA
Cucsa.026600	BBR-BPC	CsGA2ox1	1693	1716	-	31.1719	3.28e-11	5.74e-07	TGGAGAGATAGAGAGAGAGAGAGA
Cucsa.159750	BBR-BPC	CsGA3ox1	655	675	+	30.8904	4.81e-11	9.48e-07	ctctctctctctatctctcta
Cucsa.159750	BBR-BPC	CsGA20ox1	361	381	-	30.7123	5.36e-11	9.97e-07	CTTTCTTTCTCTCTCTCTCTC
Cucsa.026600	BBR-BPC	CsGA2ox1	1679	1702	-	30.1719	6.09e-11	1.01e-06	GAGAGAGAGAGAGAGAGAGTGGTT
Cucsa.026600	BBR-BPC	CsGA20ox1	361	384	+	29.8594	7.36e-11	1.16e-06	gagagagagagagaaagaaagatt
Cucsa.353140	TALE	CsGA2ox1	1744	1763	+	26.5733	8.16e-11	9.5e-06	ctctctctccctctccctcc
Cucsa.026600	BBR-BPC	CsGA3ox1	668	691	-	29.3438	1.02e-10	1.53e-06	GATAGAGATAGAGAGATAGAGAGA
Cucsa.362960	MIKC_MADS	CsGA3ox1	646	666	+	20.6812	1.26e-10	1.43e-05	tctctctctctctctctctct
Cucsa.362960	MIKC_MADS	CsGA2ox1	1685	1705	+	20.6812	1.26e-10	1.43e-05	tctctctctctctctctctct
Cucsa.362960	MIKC_MADS	CsGA2ox1	1687	1707	+	20.6812	1.26e-10	1.43e-05	tctctctctctctctctctct
Cucsa.159750	BBR-BPC	CsGA2ox1	1738	1758	+	29.3699	1.27e-10	2.22e-06	ccctatctctctctccctctc
Cucsa.159750	BBR-BPC	CsGA3ox1	641	661	+	29.2055	1.39e-10	2.22e-06	ataactctctctctctctctc
Cucsa.159750	BBR-BPC	CsDOXB3.4	1937	1957	+	29.2055	1.39e-10	2.22e-06	ataactctctctctctctctc
Cucsa.026600	BBR-BPC	CsGA3ox1	660	683	-	28.6719	1.53e-10	2.21e-06	TAGAGAGATAGAGAGATAGAGAGA
Cucsa.159750	BBR-BPC	CsDOXB3.4	1945	1965	+	28.863	1.75e-10	2.66e-06	ctctctctctctccctctcgc
Cucsa.159750	BBR-BPC	CsDOXB3.4	1939	1959	+	28.7534	1.85e-10	2.69e-06	aactctctctctctctctccc
Cucsa.026600	BBR-BPC	CsGA2ox1	1737	1760	-	28.2969	1.93e-10	2.67e-06	GGGAGAGGGAGAGAGAGATAGGGG
Cucsa.362960	MIKC_MADS	CsGA20ox1	362	382	-	20.5797	1.99e-10	1.69e-05	TCTTTCTTTCTCTCTCTCTCT
Cucsa.102120	Dof	CsDMR2	1956	1984	+	21.7969	2.19e-10	4.47e-05	acccttttctttttttctttttccttttt
Cucsa.159750	BBR-BPC	CsGA20ox1	363	383	-	28.3425	2.41e-10	3.36e-06	ATCTTTCTTTCTCTCTCTCTC
Cucsa.159750	BBR-BPC	CsGA20ox3	43	63	-	28.274	2.53e-10	3.39e-06	CTCTCTTACTCTCTCTCTCTA
Cucsa.102120	Dof	CsGA2ox3	833	861	-	21.7031	2.7e-10	4.47e-05	TCTTCTTTTTCTTTTTCTTTTTCTTTTCT
Cucsa.026600	BBR-BPC	CsGA20ox3	45	68	+	27.5625	2.98e-10	3.96e-06	gagagagagagtaagagagaaaaa
Cucsa.026600	BBR-BPC	CsGA20ox1	359	382	+	27.3906	3.3e-10	4.21e-06	ttgagagagagagagaaagaaaga
Cucsa.026600	BBR-BPC	CsGA20ox3	43	66	+	27.2656	3.55e-10	4.33e-06	tagagagagagagtaagagagaaa
Cucsa.026600	BBR-BPC	CsGA3ox1	1126	1149	+	27.2188	3.65e-10	4.33e-06	gagaggaagagaggaagagtgaga
Cucsa.129320	ERF	CsDOXC55.2	1162	1176	+	26.4219	3.75e-10	0.000132	acagcggcggcggcg
Cucsa.159750	BBR-BPC	CsGA3ox1	659	679	+	27.4932	4.02e-10	5.17e-06	ctctctctatctctctatctc
Cucsa.026600	BBR-BPC	CsGA2ox1	1743	1766	-	27.0469	4.03e-10	4.62e-06	AAAGGAGGGAGAGGGAGAGAGAGA
Cucsa.012850	ERF	CsDOXC55.2	1157	1177	-	27.4706	4.14e-10	0.000146	GCGCCGCCGCCGCTGTGGGCT
Cucsa.026600	BBR-BPC	CsGA3ox1	664	687	-	26.9062	4.37e-10	4.81e-06	GAGATAGAGAGATAGAGAGATAGA
Cucsa.026600	BBR-BPC	CsGA3ox1	640	663	-	26.8594	4.49e-10	4.81e-06	GAGAGAGAGAGAGAGAGAGTTATG
Cucsa.353140	TALE	CsACO3	1150	1169	-	25.2933	4.67e-10	4.08e-05	TCCCCCCCCCCCCCCCCCCC
Cucsa.255340	ERF	CsDOXA6.1	1126	1153	+	26.5	4.73e-10	0.000166	ccgccaaagccgccacagcgacaggggc
Cucsa.359880	ERF	CsDOXC55.2	1157	1177	+	26.3906	4.74e-10	0.000167	agcccacagcggcggcggcgc
Cucsa.101370	ERF	CsDOXC55.2	1158	1176	+	25.9375	5.63e-10	0.000199	gcccacagcggcggcggcg
Cucsa.365320	ERF	CsDOXC55.2	1163	1177	-	26.0469	6.76e-10	0.000239	GCGCCGCCGCCGCTG
Cucsa.159750	BBR-BPC	CsGA3ox1	657	677	+	26.5479	6.9e-10	8.56e-06	ctctctctctatctctctatc
Cucsa.159750	BBR-BPC	CsGA3ox1	663	683	+	26.2877	7.95e-10	9.51e-06	ctctatctctctatctctcta
Cucsa.026600	BBR-BPC	CsGA2ox1	1741	1764	-	25.8125	8.08e-10	8.39e-06	AGGAGGGAGAGGGAGAGAGAGATA
Cucsa.252730	GATA	CsGA7ox1	160	178	-	26.5942	8.08e-10	0.000278	GATCGTCATCATCATCATC
Cucsa.102120	Dof	CsDMR2	1963	1991	+	21.1562	8.5e-10	9.39e-05	tctttttttctttttccttttttctactc
Cucsa.277740	AP2	CsGA3ox1	538	557	+	21.3718	8.68e-10	0.000292	aaggaaaagagagagagagg
Cucsa.026600	BBR-BPC	CsGA2ox1	1735	1758	-	25.5938	9.12e-10	9.18e-06	GAGAGGGAGAGAGAGATAGGGGTG
Cucsa.026600	BBR-BPC	CsGA2ox1	1739	1762	-	25.5	9.6e-10	9.38e-06	GAGGGAGAGGGAGAGAGAGATAGG
Cucsa.353140	TALE	CsGA2ox1	1514	1533	+	24.6533	1.03e-09	6.1e-05	ccccccccccccccccccct
Cucsa.159750	BBR-BPC	CsGA20ox1	359	379	-	25.8082	1.04e-09	1.2e-05	TTCTTTCTCTCTCTCTCTCAA
Cucsa.353140	TALE	CsGA2ox1	1512	1531	+	24.5867	1.11e-09	6.1e-05	cacccccccccccccccccc
Cucsa.253400	ERF	CsDOXC55.2	1163	1177	-	24.9531	1.21e-09	0.000426	GCGCCGCCGCCGCTG
Cucsa.353140	TALE	CsGA2ox1	1516	1535	+	24.5067	1.22e-09	6.1e-05	cccccccccccccccccttt
Cucsa.255340	ERF	CsDOXA6.1	1501	1528	-	25.5938	1.23e-09	0.000215	CCTTCATCGCCGCCGCTGGTGGTGCGAA
Cucsa.159750	BBR-BPC	CsGA2ox1	1696	1716	+	25.4384	1.27e-09	1.42e-05	ctctctctctctatctctcca
Cucsa.026600	BBR-BPC	CsGA3ox1	1124	1147	+	24.7344	1.47e-09	1.36e-05	aagagaggaagagaggaagagtga
Cucsa.026600	BBR-BPC	CsGA2ox1	1749	1772	-	24.7188	1.48e-09	1.36e-05	GAGAGAAAAGGAGGGAGAGGGAGA
Cucsa.161430	MYB	CsF3H1	116	130	+	18.875	1.57e-09	0.000554	aaatatgaccgttgg
Cucsa.026600	BBR-BPC	CsGA3ox1	666	689	-	24.5781	1.6e-09	1.41e-05	TAGAGATAGAGAGATAGAGAGATA
Cucsa.026600	BBR-BPC	CsGA3ox1	662	685	-	24.5625	1.61e-09	1.41e-05	GATAGAGAGATAGAGAGATAGAGA
Cucsa.095860	ERF	CsDOXC55.2	1163	1177	+	24.5781	2.36e-09	0.000836	cagcggcggcggcgc
Cucsa.159750	BBR-BPC	CsDMR2	255	275	+	24.2192	2.48e-09	2.62e-05	atctctctctctctctatata
Cucsa.159750	BBR-BPC	CsGA2ox1	1740	1760	+	24.2055	2.5e-09	2.62e-05	ctatctctctctccctctccc
Cucsa.026600	BBR-BPC	CsGA2ox1	1747	1770	-	23.75	2.5e-09	2.13e-05	GAGAAAAGGAGGGAGAGGGAGAGA
Cucsa.129320	ERF	CsDOXC55.2	1165	1179	+	24.7812	2.52e-09	0.000445	gcggcggcggcgcaa
Cucsa.098430	Dof	CsD4H4	894	914	+	18.6406	2.82e-09	0.0008	aagaaaaggaaaaagggaaag
Cucsa.159750	BBR-BPC	CsGA3ox1	667	687	+	23.9726	2.84e-09	2.88e-05	atctctctatctctctatctc
Cucsa.026600	BBR-BPC	CsGA3ox1	1132	1155	+	23.2656	3.24e-09	2.69e-05	aagagaggaagagtgagagggggg
Cucsa.026600	BBR-BPC	CsGA20ox3	47	70	+	23.0938	3.55e-09	2.83e-05	gagagagagtaagagagaaaaaaa
Cucsa.026600	BBR-BPC	CsGA2ox1	1745	1768	-	23.0781	3.58e-09	2.83e-05	GAAAAGGAGGGAGAGGGAGAGAGA
Cucsa.026600	BBR-BPC	CsDOXB3.4	1936	1959	-	22.875	3.98e-09	3.07e-05	GGGAGAGAGAGAGAGAGAGTTATC
Cucsa.362960	MIKC_MADS	CsDMR5	1236	1256	-	19.6957	3.98e-09	0.000151	TTTCTTTCTTTCTTTCTTTCT
Cucsa.362960	MIKC_MADS	CsDMR5	1240	1260	-	19.6957	3.98e-09	0.000151	TTTCTTTCTTTCTTTCTTTCT
Cucsa.362960	MIKC_MADS	CsDMR5	1244	1264	-	19.6957	3.98e-09	0.000151	TTTCTTTCTTTCTTTCTTTCT
Cucsa.362960	MIKC_MADS	CsDMR5	1248	1268	-	19.6957	3.98e-09	0.000151	TTTCTTTCTTTCTTTCTTTCT
Cucsa.362960	MIKC_MADS	CsDMR5	1252	1272	-	19.6957	3.98e-09	0.000151	TTTCTTTCTTTCTTTCTTTCT
Cucsa.277740	AP2	CsDOXA6.5	1100	1119	+	20.7692	4.09e-09	0.000465	agaaaaaagagagagagaga
Cucsa.271720	ERF	CsDOXC55.2	1160	1178	+	24.0781	4.29e-09	0.00151	ccacagcggcggcggcgca
Cucsa.365220	ERF	CsDOXA6.4	185	204	+	23.375	4.38e-09	0.00154	ccagcccccgcaccaccgtc
Cucsa.026600	BBR-BPC	CsGA2ox2	1812	1835	-	22.6094	4.57e-09	3.45e-05	GAGAGAGAGAGGGGAGAAAAGAGA
Cucsa.362960	MIKC_MADS	CsGA2ox3	840	860	-	19.6377	4.66e-09	0.000158	CTTCTTTTTCTTTTTCTTTTT
Cucsa.042770	ERF	CsDOXA6.1	1511	1531	-	23.8438	4.69e-09	0.00165	CGACCTTCATCGCCGCCGCTG
Cucsa.098430	Dof	CsDMR2	1966	1986	-	18.4219	4.81e-09	0.0008	GAAAAAAGGAAAAAGAAAAAA
Cucsa.026600	BBR-BPC	CsGA20ox1	357	380	+	22.4531	4.96e-09	3.66e-05	tattgagagagagagagaaagaaa
Cucsa.307870	C2H2	CsDOXC45.1	1471	1489	-	23.8136	4.99e-09	0.00171	CTTCCTTATCTTCCTCCTC
Cucsa.159750	BBR-BPC	CsDMR2	257	277	+	22.8767	5.03e-09	4.95e-05	ctctctctctctctatatata
Cucsa.159750	BBR-BPC	CsGA3ox1	671	691	+	22.7671	5.31e-09	5.08e-05	ctctatctctctatctctatc
Cucsa.175460	MYB	CsF3H1	115	129	+	19.2188	5.31e-09	0.00184	aaaatatgaccgttg
Cucsa.159750	BBR-BPC	CsGA3ox1	661	681	+	22.6712	5.58e-09	5.19e-05	ctctctatctctctatctctc
Cucsa.026600	BBR-BPC	CsGA3ox1	672	695	-	22.2188	5.6e-09	4.04e-05	GATAGATAGAGATAGAGAGATAGA
Cucsa.102120	Dof	CsDOXC55.4	711	739	-	20.1094	5.77e-09	0.000478	TCTTTTTCTTTTTTTCCTTTTGTTATTTT
Cucsa.026600	BBR-BPC	CsGA20ox1	363	386	+	22.1562	5.78e-09	4.08e-05	gagagagagagaaagaaagattaa
Cucsa.252730	GATA	CsGA7ox1	199	217	-	24.0145	5.93e-09	0.000955	CATCATCCTCATCATCACC
Cucsa.321150	ERF	CsDOXC55.2	1160	1180	-	24.2344	5.99e-09	0.00129	ATTGCGCCGCCGCCGCTGTGG
Cucsa.046660	ERF	CsDOXC55.2	1165	1181	+	24.0469	6e-09	0.00158	gcggcggcggcgcaatc
Cucsa.248870	MIKC_MADS	CsD4H4	1224	1242	+	22.25	6.31e-09	0.00217	atttccatttttggtaagt
Cucsa.088640	ERF	CsLBO1	662	676	-	23.0781	6.53e-09	0.00231	GTTGGTGGCGGTGGA
Cucsa.353140	TALE	CsF3H2	209	228	+	22.9867	6.54e-09	0.000286	cttcctctccctgcccctct
Cucsa.362960	MIKC_MADS	CsF3H2	1821	1841	+	19.4928	6.86e-09	0.0002	cctttttttttttctcttttt
Cucsa.255340	ERF	CsDOXC55.2	1156	1183	-	23.7656	7.04e-09	0.000824	TTGATTGCGCCGCCGCCGCTGTGGGCTG
Cucsa.102120	Dof	CsGA2ox3	827	855	-	19.9688	7.29e-09	0.000483	TTTTCTTTTTCTTTTTCTTTTCTTTTCTT
Cucsa.321150	ERF	CsDOXA6.1	1508	1528	-	23.9688	7.3e-09	0.00129	CCTTCATCGCCGCCGCTGGTG
Cucsa.026600	BBR-BPC	CsDMR5	1235	1258	+	21.6094	7.63e-09	4.97e-05	aagaaagaaagaaagaaagaaaga
Cucsa.026600	BBR-BPC	CsDMR5	1239	1262	+	21.6094	7.63e-09	4.97e-05	aagaaagaaagaaagaaagaaaga
Cucsa.026600	BBR-BPC	CsDMR5	1243	1266	+	21.6094	7.63e-09	4.97e-05	aagaaagaaagaaagaaagaaaga
Cucsa.026600	BBR-BPC	CsDMR5	1247	1270	+	21.6094	7.63e-09	4.97e-05	aagaaagaaagaaagaaagaaaga
Cucsa.213830	Dof	CsDOXC45.1	251	271	-	19.4062	8.02e-09	0.0012	TTTACTTTTTTCTTTTCTTTT
Cucsa.159750	BBR-BPC	CsGA3ox1	665	685	+	21.8904	8.25e-09	7.38e-05	ctatctctctatctctctatc
Cucsa.252730	GATA	CsGA7ox1	169	187	-	23.5362	8.32e-09	0.000955	CATCATCTTGATCGTCATC
Cucsa.158340	MYB	CsDOXC37.2	577	591	-	20.8125	8.41e-09	0.00294	CCTCCAACTACCACC
Cucsa.159750	BBR-BPC	CsGA20ox1	365	385	-	21.8493	8.43e-09	7.38e-05	TAATCTTTCTTTCTCTCTCTC
Cucsa.353140	TALE	CsGA2ox1	1506	1525	+	22.7333	8.48e-09	0.000296	ctctcccacccccccccccc
Cucsa.353140	TALE	CsGA2ox1	1515	1534	+	22.7333	8.48e-09	0.000296	cccccccccccccccccctt
Cucsa.159750	BBR-BPC	CsGA20ox1	357	377	-	21.8082	8.59e-09	7.38e-05	CTTTCTCTCTCTCTCTCAATA
Cucsa.102120	Dof	CsJOX2	550	578	-	19.8438	8.93e-09	0.000493	TTCTTTTTCCTTTTCACTTTTTTACTTGA
Cucsa.046660	ERF	CsDOXA6.1	1513	1529	+	23.5625	8.94e-09	0.00158	gcggcggcgatgaaggt
Cucsa.026600	BBR-BPC	CsGA2ox1	1751	1774	-	21.2031	9.37e-09	5.98e-05	AAGAGAGAAAAGGAGGGAGAGGGA
Cucsa.213830	Dof	CsDOXC55.4	722	742	-	19.3125	9.68e-09	0.0012	TTTTCTTTTTCTTTTTTTCCT
Cucsa.197650	TCP	CsGA2ox3	1434	1453	-	23.0581	1.01e-08	0.00355	GTGAAGTGTGTGGGACCCAC
Cucsa.362960	MIKC_MADS	CsDOXB1.2	316	336	-	19.3333	1.01e-08	0.0002	CTTTTTTTTTTCTCTCTTCTT
Cucsa.362960	MIKC_MADS	CsDMR5	1234	1254	-	19.3188	1.04e-08	0.0002	TCTTTCTTTCTTTCTTTCTTT
Cucsa.362960	MIKC_MADS	CsDMR5	1238	1258	-	19.3188	1.04e-08	0.0002	TCTTTCTTTCTTTCTTTCTTT
Cucsa.362960	MIKC_MADS	CsDMR5	1242	1262	-	19.3188	1.04e-08	0.0002	TCTTTCTTTCTTTCTTTCTTT
Cucsa.362960	MIKC_MADS	CsDMR5	1246	1266	-	19.3188	1.04e-08	0.0002	TCTTTCTTTCTTTCTTTCTTT
Cucsa.362960	MIKC_MADS	CsDMR5	1250	1270	-	19.3188	1.04e-08	0.0002	TCTTTCTTTCTTTCTTTCTTT
Cucsa.196600	LBD	CsDOXA6.1	1122	1142	+	23.0312	1.05e-08	0.00371	gctgccgccaaagccgccaca
Cucsa.359570	GATA	CsGA7ox1	159	173	-	24	1.07e-08	0.00227	TCATCATCATCATCT
Cucsa.159750	BBR-BPC	CsDMR2	253	273	+	21.3425	1.08e-08	9.05e-05	aaatctctctctctctctata
Cucsa.341290	Dof	CsGA2ox3	840	860	+	17.7188	1.1e-08	0.00318	aaaaagaaaaagaaaaagaag
Cucsa.026600	BBR-BPC	CsGA3ox1	1128	1151	+	20.875	1.1e-08	6.92e-05	gaggaagagaggaagagtgagagg
Cucsa.277740	AP2	CsACO4	1789	1808	-	20.2308	1.11e-08	0.000465	AAGAAGAAGAAGAAGAGAGA
Cucsa.362960	MIKC_MADS	CsGA2ox3	834	854	-	19.2899	1.12e-08	0.0002	TTTCTTTTTCTTTTTCTTTTC
Cucsa.362960	MIKC_MADS	CsGA2ox1	1822	1842	-	19.2899	1.12e-08	0.0002	TTTCTTTTTCTTTTTCTTTTC
Cucsa.026600	BBR-BPC	CsDOXB3.4	1934	1957	-	20.7812	1.16e-08	7.11e-05	GAGAGAGAGAGAGAGAGTTATCGG
Cucsa.159750	BBR-BPC	CsGA2ox1	1678	1698	+	21.2055	1.16e-08	9.29e-05	aaaccactctctctctctctc
Cucsa.159750	BBR-BPC	CsGA3ox1	639	659	+	21.1918	1.17e-08	9.29e-05	acataactctctctctctctc
Cucsa.277740	AP2	CsDOXC55.1	1143	1162	+	20.1923	1.18e-08	0.000465	gaagaaaaaaaagagagaaa
Cucsa.098430	Dof	CsDOXB3.3	144	164	+	18.0312	1.2e-08	0.00133	aaaaaaagaaaaaaggaaaag
Cucsa.362960	MIKC_MADS	CsGA2ox3	1179	1199	+	19.2464	1.23e-08	0.000207	tttttctttttctttctttcc
Cucsa.159750	BBR-BPC	CsGA2ox1	1742	1762	+	21.0274	1.26e-08	9.84e-05	atctctctctccctctccctc
Cucsa.231820	ERF	CsDOXC55.2	1163	1177	-	22.5156	1.27e-08	0.0045	GCGCCGCCGCCGCTG
Cucsa.362960	MIKC_MADS	CsDOXB3.4	1942	1962	+	19.2319	1.28e-08	0.000207	tctctctctctctctccctct
Cucsa.255340	ERF	CsDOXC55.2	1153	1180	-	23.0781	1.28e-08	0.00113	ATTGCGCCGCCGCCGCTGTGGGCTGGTT
Cucsa.277740	AP2	CsDOXA6.5	1098	1117	+	20.141	1.29e-08	0.000465	agagaaaaaagagagagaga
Cucsa.159750	BBR-BPC	CsDOXC37.1	1866	1886	+	20.9178	1.33e-08	0.000101	ttctatttctctctctctcaa
Cucsa.198560	Dof	CsLBO1	676	689	+	15.2031	1.33e-08	0.00439	caaaaagggaaaaa
Cucsa.359570	GATA	CsGA7ox1	201	215	-	22.7656	1.39e-08	0.00227	TCATCCTCATCATCA
Cucsa.353140	TALE	CsF3H2	213	232	+	22.2267	1.4e-08	0.000424	ctctccctgcccctctctac
Cucsa.026600	BBR-BPC	CsGA3ox1	676	699	-	20.3906	1.4e-08	8.48e-05	GATAGATAGATAGAGATAGAGAGA
Cucsa.353140	TALE	CsGA2ox1	1510	1529	+	22.1867	1.46e-08	0.000424	cccacccccccccccccccc
Cucsa.102120	Dof	CsGA3ox2	1657	1685	+	19.5156	1.5e-08	0.00071	aacttttttcttttttctttttatttttt
Cucsa.277740	AP2	CsDMR2	1961	1980	-	20.0513	1.51e-08	0.000465	AGGAAAAAGAAAAAAAGAAA
Cucsa.026600	BBR-BPC	CsGA3ox1	638	661	-	20.1562	1.58e-08	9.36e-05	GAGAGAGAGAGAGAGAGTTATGTA
Cucsa.321150	ERF	CsDOXC55.2	1163	1183	-	22.8906	1.58e-08	0.00186	TTGATTGCGCCGCCGCCGCTG
Cucsa.159750	BBR-BPC	CsGA3ox1	673	693	+	20.5616	1.58e-08	0.000118	ctatctctctatctctatcta
Cucsa.159750	BBR-BPC	CsGA20ox3	47	67	-	20.4247	1.69e-08	0.000123	TTTTCTCTCTTACTCTCTCTC
Cucsa.213830	Dof	CsGA2ox3	829	849	-	19	1.69e-08	0.0012	TTTTCTTTTTCTTTTCTTTTC
Cucsa.026600	BBR-BPC	CsGA3ox1	1134	1157	+	19.9688	1.73e-08	0.000101	gagaggaagagtgagagggggggg
Cucsa.277740	AP2	CsGA3ox2	875	894	+	19.9615	1.73e-08	0.000465	aaagaagaaaaaaaaagaaa
Cucsa.277740	AP2	CsGA3ox1	1120	1139	+	19.9615	1.73e-08	0.000465	taggaagagaggaagagagg
Cucsa.159750	BBR-BPC	CsGA3ox1	669	689	+	20.3288	1.77e-08	0.000126	ctctctatctctctatctcta
Cucsa.026600	BBR-BPC	CsDOXB1.2	303	326	+	19.8906	1.8e-08	0.000103	aagaaagggaaagaagaagagaga
Cucsa.102120	Dof	CsGA2ox1	1821	1849	-	19.375	1.86e-08	0.00077	CCCTTTATTTCTTTTTCTTTTTCTTTTCT
Cucsa.213830	Dof	CsGA2ox3	835	855	-	18.9375	1.88e-08	0.0012	TTTTCTTTTTCTTTTTCTTTT
Cucsa.026600	BBR-BPC	CsGA2ox1	1677	1700	-	19.7812	1.9e-08	0.000107	GAGAGAGAGAGAGAGAGTGGTTTT
Cucsa.098430	Dof	CsDOXB3.3	1907	1927	-	17.8125	1.9e-08	0.00158	CGAGGAAGGAAAAAGGAAAAA
Cucsa.353140	TALE	CsDOXB3.4	1945	1964	+	21.8933	1.93e-08	0.000497	ctctctctctctccctctcg
Cucsa.362960	MIKC_MADS	CsDMR2	1959	1979	+	19.0435	1.95e-08	0.000301	cttttctttttttctttttcc
Cucsa.280310	GRAS	CsGA20ox3	1880	1899	-	19.4058	2.01e-08	0.00387	GAGAAAAAGAGAAAAGCCAA
Cucsa.026600	BBR-BPC	CsGA20ox3	49	72	+	19.6406	2.03e-08	0.000112	gagagagtaagagagaaaaaaaaa
Cucsa.353140	TALE	CsDOXB3.4	1949	1968	+	21.8267	2.06e-08	0.000497	ctctctctccctctcgcgcg
Cucsa.277740	AP2	CsGA2ox3	823	842	+	19.859	2.06e-08	0.000465	aaaaaagaaaagaaaagaaa
Cucsa.277740	AP2	CsGA2ox3	1049	1068	-	19.859	2.06e-08	0.000465	AAAAAAGAAAAGAAAAGAAA
Cucsa.277740	AP2	CsDOXB1.2	307	326	+	19.8462	2.11e-08	0.000465	aagggaaagaagaagagaga
Cucsa.353140	TALE	CsDOXB3.4	1943	1962	+	21.7867	2.14e-08	0.000497	ctctctctctctctccctct
Cucsa.277740	AP2	CsDOXB1.2	309	328	+	19.8205	2.19e-08	0.000465	gggaaagaagaagagagaaa
Cucsa.213830	Dof	CsDMR2	1960	1980	+	18.8438	2.2e-08	0.0012	ttttctttttttctttttcct
Cucsa.178830	LBD	CsDOXA6.1	1120	1140	+	22.0312	2.23e-08	0.00785	cagctgccgccaaagccgcca
Cucsa.280310	GRAS	CsGA20ox1	363	382	+	19.3333	2.25e-08	0.00387	gagagagagagaaagaaaga
Cucsa.159750	BBR-BPC	CsGA2ox1	1744	1764	+	19.8219	2.26e-08	0.000157	ctctctctccctctccctcct
Cucsa.362960	MIKC_MADS	CsGA20ox1	360	380	-	18.971	2.27e-08	0.00033	TTTCTTTCTCTCTCTCTCTCA
Cucsa.277740	AP2	CsACO4	1787	1806	-	19.7821	2.31e-08	0.000465	GAAGAAGAAGAAGAGAGAAG
Cucsa.362960	MIKC_MADS	CsDOXB1.1	896	916	+	18.9565	2.33e-08	0.00033	tttcttttttttttttttttt
Cucsa.102120	Dof	CsDOXA6.5	1595	1623	+	19.2188	2.35e-08	0.000851	tttcttctcttttttactttttttagcat
Cucsa.277740	AP2	CsDOXB1.1	896	915	-	19.7564	2.42e-08	0.000465	AAAAAAAAAAAAAAAAGAAA
Cucsa.277740	AP2	CsACO1	1724	1743	+	19.7564	2.42e-08	0.000465	aaaaaaaaaaaaaaaagagg
Cucsa.159750	BBR-BPC	CsGA3ox1	1126	1146	-	19.6575	2.44e-08	0.000167	CACTCTTCCTCTCTTCCTCTC
Cucsa.362960	MIKC_MADS	CsGA2ox3	838	858	-	18.9275	2.48e-08	0.000337	TCTTTTTCTTTTTCTTTTTCT
Cucsa.159750	BBR-BPC	CsGA20ox3	45	65	-	19.5616	2.55e-08	0.000171	TTCTCTCTTACTCTCTCTCTC
Cucsa.277740	AP2	CsGA2ox1	1273	1292	+	19.7179	2.59e-08	0.000465	aaaaaagaaaagaaaagaag
Cucsa.098190	E2F/DP	CsDMR1	593	613	+	22.4706	2.6e-08	0.00917	ttccgtcttttcccgccaaaa
Cucsa.277740	AP2	CsDOXC23.1	230	249	-	19.7051	2.65e-08	0.000465	AAGAAAAAGAAAAAGAAAAA
Cucsa.277740	AP2	CsGA2ox3	837	856	+	19.7051	2.65e-08	0.000465	aagaaaaagaaaaagaaaaa
Cucsa.213830	Dof	CsGA20ox2	1963	1983	-	18.7188	2.69e-08	0.0012	TTTTCTTTTTCCTTTTTATTT
Cucsa.102120	Dof	CsDOXB3.3	1897	1925	+	19.125	2.7e-08	0.000851	aatccttttatttttcctttttccttcct
Cucsa.253400	ERF	CsDOXA6.1	1511	1525	-	21.9219	2.74e-08	0.00484	TCATCGCCGCCGCTG
Cucsa.365320	ERF	CsDOXA6.1	1511	1525	-	21.9531	2.77e-08	0.00489	TCATCGCCGCCGCTG
Cucsa.213830	Dof	CsDMR2	1968	1988	+	18.7031	2.77e-08	0.0012	ttttctttttccttttttcta
Cucsa.252730	GATA	CsGA7ox1	190	208	-	21.7246	2.8e-08	0.00241	CATCATCACCAGCATCATT
Cucsa.102120	Dof	CsD4H4	881	909	-	19.0938	2.83e-08	0.000851	CCTTTTTCCTTTTCTTCTTTTTGTGTTCA
Cucsa.166230	TCP	CsGA2ox3	1434	1444	-	22.4688	2.88e-08	0.0102	GTGGGACCCAC
Cucsa.012850	ERF	CsDOXA6.1	1120	1140	+	21.6029	2.92e-08	0.00438	cagctgccgccaaagccgcca
Cucsa.026600	BBR-BPC	CsDOXB3.4	1944	1967	-	18.8594	2.97e-08	0.000161	GCGCGAGAGGGAGAGAGAGAGAGA
Cucsa.213830	Dof	CsGA3ox4	724	744	+	18.625	3.17e-08	0.0012	gttacttttttttctttcttt
Cucsa.095860	ERF	CsDOXC55.2	1166	1180	+	21.7969	3.17e-08	0.00436	cggcggcggcgcaat
Cucsa.342790	MIKC_MADS	CsD4H4	1225	1239	-	19.2794	3.18e-08	0.0107	TACCAAAAATGGAAA
Cucsa.051050	MYB	CsGA2ox1	521	535	-	18.8281	3.18e-08	0.0112	TCCACCCACCACCAA
Cucsa.359570	GATA	CsGA7ox1	162	176	-	21.75	3.28e-08	0.00357	TCGTCATCATCATCA
Cucsa.213830	Dof	CsF3H2	1136	1156	-	18.5938	3.34e-08	0.0012	GTTACTTTTTTTTTTTTTTTG
Cucsa.307870	C2H2	CsF3H1	1290	1308	-	21.3051	3.34e-08	0.00282	CTTCACCTTCCTCCTCCTT
Cucsa.026600	BBR-BPC	CsGA3ox1	674	697	-	18.5781	3.39e-08	0.000182	TAGATAGATAGAGATAGAGAGATA
Cucsa.248870	MIKC_MADS	CsDOXB3.2	1709	1727	-	20.8594	3.39e-08	0.00585	CTTTCTTTTTTAGGAAAGA
Cucsa.362960	MIKC_MADS	CsDOXB3.3	144	164	-	18.7681	3.41e-08	0.000442	CTTTTCCTTTTTTCTTTTTTT
Cucsa.277740	AP2	CsGA3ox1	646	665	-	19.5256	3.49e-08	0.000465	GAGAGAGAGAGAGAGAGAGA
Cucsa.277740	AP2	CsGA2ox1	1685	1704	-	19.5256	3.49e-08	0.000465	GAGAGAGAGAGAGAGAGAGA
Cucsa.277740	AP2	CsGA2ox1	1687	1706	-	19.5256	3.49e-08	0.000465	GAGAGAGAGAGAGAGAGAGA
Cucsa.362960	MIKC_MADS	CsDOXB1.2	314	334	-	18.7536	3.51e-08	0.000442	TTTTTTTTTCTCTCTTCTTCT
Cucsa.102120	Dof	CsJOX2	1769	1797	+	18.9375	3.54e-08	0.000944	ccctctccccttttacctttttattttct
Cucsa.026600	BBR-BPC	CsGA2ox1	1891	1914	-	18.4375	3.62e-08	0.000191	GAGGAAGAAAAAGAGAGTGTGAGA
Cucsa.341290	Dof	CsDOXB3.3	147	167	+	17.1719	3.67e-08	0.00318	aaaagaaaaaaggaaaaggag
Cucsa.095860	ERF	CsDOXA6.1	1511	1525	+	21.5938	3.7e-08	0.00436	cagcggcggcgatga
Cucsa.277740	AP2	CsDOXA6.5	1096	1115	+	19.4872	3.7e-08	0.000465	aaagagaaaaaagagagaga
Cucsa.102120	Dof	CsD4H4	889	917	-	18.9062	3.7e-08	0.000944	AACCTTTCCCTTTTTCCTTTTCTTCTTTT
Cucsa.012850	ERF	CsDOXC55.2	1160	1180	-	21.2206	3.73e-08	0.00438	ATTGCGCCGCCGCCGCTGTGG
Cucsa.026600	BBR-BPC	CsGA3ox1	682	705	-	18.3281	3.82e-08	0.000198	GAGATAGATAGATAGATAGAGATA
Cucsa.098430	Dof	CsDOXC23.1	229	249	-	17.4688	3.84e-08	0.00248	AAGAAAAAGAAAAAGAAAAAA
Cucsa.175390	Dof	CsDOXC3.2	702	716	+	16.2812	3.88e-08	0.0132	ttttttcactttttg
Cucsa.026600	BBR-BPC	CsGA2ox5	1032	1055	-	18.2812	3.9e-08	0.000199	GTGAGAGTGTGTGAGAGAAAGAGG
Cucsa.362960	MIKC_MADS	CsDOXC55.4	723	743	-	18.6957	3.93e-08	0.000477	TTTTTCTTTTTCTTTTTTTCC
Cucsa.349640	MIKC_MADS	CsD4H4	1225	1237	-	18.2794	3.95e-08	0.0139	CCAAAAATGGAAA
Cucsa.310360	ERF	CsDOXA6.1	1512	1532	-	20.2353	4.01e-08	0.00887	GCGACCTTCATCGCCGCCGCT
Cucsa.047280	MIKC_MADS	CsD4H4	1222	1240	+	18.75	4.04e-08	0.014	aaatttccatttttggtaa
Cucsa.277740	AP2	CsDOXB3.4	1942	1961	-	19.4103	4.13e-08	0.000465	GAGGGAGAGAGAGAGAGAGA
Cucsa.238090	TCP	CsGA2ox3	1433	1462	+	21.3671	4.3e-08	0.0151	cgtgggtcccacacacttcacttttctcat
Cucsa.098430	Dof	CsDOXC3.2	704	724	-	17.3906	4.47e-08	0.00248	AATAAAAACAAAAAGTGAAAA
Cucsa.213830	Dof	CsACO5	1866	1886	+	18.4062	4.51e-08	0.00146	ttatctttttttcttttcttt
Cucsa.362960	MIKC_MADS	CsDOXC23.1	230	250	+	18.6232	4.51e-08	0.000492	tttttctttttctttttcttt
Cucsa.362960	MIKC_MADS	CsGA2ox3	836	856	-	18.6232	4.51e-08	0.000492	TTTTTCTTTTTCTTTTTCTTT
Cucsa.362960	MIKC_MADS	CsF3H2	1823	1843	+	18.6232	4.51e-08	0.000492	tttttttttttctctttttgt
Cucsa.102120	Dof	CsGA20ox2	1967	1995	-	18.7656	4.52e-08	0.00107	TTATTCTTTTTATTTTCTTTTTCCTTTTT
Cucsa.252730	GATA	CsGA7ox1	163	181	-	20.9855	4.53e-08	0.00312	CTTGATCGTCATCATCATC
Cucsa.277740	AP2	CsDMR5	1235	1254	+	19.3462	4.53e-08	0.000465	aagaaagaaagaaagaaaga
Cucsa.277740	AP2	CsDMR5	1239	1258	+	19.3462	4.53e-08	0.000465	aagaaagaaagaaagaaaga
Cucsa.277740	AP2	CsDMR5	1243	1262	+	19.3462	4.53e-08	0.000465	aagaaagaaagaaagaaaga
Cucsa.277740	AP2	CsDMR5	1247	1266	+	19.3462	4.53e-08	0.000465	aagaaagaaagaaagaaaga
Cucsa.277740	AP2	CsDMR5	1251	1270	+	19.3462	4.53e-08	0.000465	aagaaagaaagaaagaaaga
Cucsa.244290	ERF	CsDOXC55.2	1162	1176	+	20.8594	4.54e-08	0.016	acagcggcggcggcg
Cucsa.026600	BBR-BPC	CsGA3ox1	670	693	-	17.9531	4.56e-08	0.000229	TAGATAGAGATAGAGAGATAGAGA
Cucsa.341290	Dof	CsGA2ox3	834	854	+	17.0625	4.59e-08	0.00318	gaaaagaaaaagaaaaagaaa
Cucsa.341290	Dof	CsGA2ox1	1822	1842	+	17.0625	4.59e-08	0.00318	gaaaagaaaaagaaaaagaaa
Cucsa.362960	MIKC_MADS	CsGA7ox1	1244	1264	-	18.6087	4.63e-08	0.000492	GTTTGTTTTCTCTCTCTTTTT
Cucsa.026600	BBR-BPC	CsGA2ox1	1695	1718	-	17.8906	4.69e-08	0.000233	TTTGGAGAGATAGAGAGAGAGAGA
Cucsa.277740	AP2	CsGA2ox3	1019	1038	-	19.3205	4.7e-08	0.000465	AGAAAAGAAAAGAAAAGAAA
Cucsa.277740	AP2	CsGA2ox3	1024	1043	-	19.3205	4.7e-08	0.000465	AGAAAAGAAAAGAAAAGAAA
Cucsa.277740	AP2	CsGA2ox3	1029	1048	-	19.3205	4.7e-08	0.000465	AGAAAAGAAAAGAAAAGAAA
Cucsa.277740	AP2	CsGA2ox3	1034	1053	-	19.3205	4.7e-08	0.000465	AGAAAAGAAAAGAAAAGAAA
Cucsa.277740	AP2	CsGA2ox3	1039	1058	-	19.3205	4.7e-08	0.000465	AGAAAAGAAAAGAAAAGAAA
Cucsa.277740	AP2	CsGA2ox3	1044	1063	-	19.3205	4.7e-08	0.000465	AGAAAAGAAAAGAAAAGAAA
Cucsa.159750	BBR-BPC	CsDOXC37.1	1868	1888	+	18.2329	4.7e-08	0.000309	ctatttctctctctctcaatt
Cucsa.341290	Dof	CsDMR2	1963	1983	-	17.0469	4.73e-08	0.00318	AAAAGGAAAAAGAAAAAAAGA
Cucsa.231820	ERF	CsDOXC45.1	1003	1017	+	20.9531	4.77e-08	0.00843	ccgccaccaccacca
Cucsa.307870	C2H2	CsACO3	1148	1166	-	20.7712	4.94e-08	0.00282	CCCCCCCCCCCCCCCCCCC
Cucsa.307870	C2H2	CsACO3	1149	1167	-	20.7712	4.94e-08	0.00282	CCCCCCCCCCCCCCCCCCC
Cucsa.307870	C2H2	CsACO3	1150	1168	-	20.7712	4.94e-08	0.00282	CCCCCCCCCCCCCCCCCCC
Cucsa.307870	C2H2	CsGA2ox1	1514	1532	+	20.7712	4.94e-08	0.00282	ccccccccccccccccccc
Cucsa.159750	BBR-BPC	CsGA3ox1	675	695	+	18.0959	5e-08	0.000322	atctctctatctctatctatc
Cucsa.353140	TALE	CsDOXB3.4	1947	1966	+	20.84	5.04e-08	0.00109	ctctctctctccctctcgcg
Cucsa.310360	ERF	CsDOXA6.1	1122	1142	+	19.8235	5.05e-08	0.00887	gctgccgccaaagccgccaca
Cucsa.277740	AP2	CsGA2ox3	831	850	+	19.2692	5.05e-08	0.000471	aaagaaaagaaaaagaaaaa
Cucsa.277740	AP2	CsDOXA6.5	1598	1617	-	19.2692	5.05e-08	0.000471	AAAAAAGTAAAAAAGAGAAG
Cucsa.112810	Dof	CsDOXC3.2	704	722	-	17.9062	5.17e-08	0.00965	TAAAAACAAAAAGTGAAAA
Cucsa.277740	AP2	CsDOXC55.4	722	741	+	19.2308	5.31e-08	0.000482	aggaaaaaaagaaaaagaaa
Cucsa.026600	BBR-BPC	CsDMR2	256	279	-	17.625	5.31e-08	0.000259	TATATATATAGAGAGAGAGAGAGA
Cucsa.026600	BBR-BPC	CsDOXC37.1	1861	1884	-	17.5938	5.39e-08	0.000259	GAGAGAGAGAGAAATAGAAATTAA
Cucsa.237150	ERF	CsDOXA6.1	1514	1533	-	20.5938	5.49e-08	0.0193	TGCGACCTTCATCGCCGCCG
Cucsa.349500	TCP	CsDOXC21.4	257	266	-	20.25	5.59e-08	0.0198	GGGCCCCACC
Cucsa.112810	Dof	CsD4H4	896	914	+	17.8594	5.68e-08	0.00965	gaaaaggaaaaagggaaag
Cucsa.362960	MIKC_MADS	CsDOXC45.1	803	823	-	18.4928	5.73e-08	0.000527	CTTCTTCTTTTCTTTTTCTTT
Cucsa.277740	AP2	CsGA2ox3	1014	1033	-	19.1795	5.74e-08	0.000508	AGAAAAGAAAAGAAAAGAAG
Cucsa.334870	ERF	CsDOXA6.1	1514	1528	-	20.3906	5.8e-08	0.017	CCTTCATCGCCGCCG
Cucsa.359880	ERF	CsDOXC55.2	1160	1180	+	20.9844	5.86e-08	0.00989	ccacagcggcggcggcgcaat
Cucsa.088640	ERF	CsDOXC45.1	1002	1016	-	20.6875	5.97e-08	0.0102	GGTGGTGGTGGCGGT
Cucsa.362960	MIKC_MADS	CsDMR2	1961	1981	+	18.4638	6.04e-08	0.000527	tttctttttttctttttcctt
Cucsa.362960	MIKC_MADS	CsDMR2	1967	1987	+	18.4638	6.04e-08	0.000527	tttttctttttccttttttct
Cucsa.026600	BBR-BPC	CsGA2ox1	1697	1720	-	17.3438	6.05e-08	0.000287	GTTTTGGAGAGATAGAGAGAGAGA
Cucsa.248080	bZIP	CsDOXB3.4	1807	1821	+	21.2969	6.07e-08	0.0214	cattctgacgtggca
Cucsa.337320	MYB	CsDOXC37.2	575	593	-	19.1875	6.09e-08	0.0212	CGCCTCCAACTACCACCTT
Cucsa.213830	Dof	CsGA3ox2	1662	1682	+	18.2031	6.11e-08	0.00171	ttttcttttttctttttattt
Cucsa.026600	BBR-BPC	CsDMR5	1251	1274	+	17.3125	6.14e-08	0.000287	aagaaagaaagaaagaaagaaata
Cucsa.215290	TCP	CsGA2ox3	1343	1355	-	20.8767	6.16e-08	0.0218	GTGGGGTCCACTG
Cucsa.159750	BBR-BPC	CsGA2ox1	1746	1766	+	17.6164	6.2e-08	0.000392	ctctctccctctccctccttt
Cucsa.166230	TCP	CsGA2ox3	1434	1444	+	21.3594	6.21e-08	0.011	gtgggtcccac
Cucsa.336890	ERF	CsDOXC55.2	1164	1174	-	21.2031	6.27e-08	0.0123	CCGCCGCCGCT
Cucsa.042770	ERF	CsDOXA6.1	1120	1140	+	20.5156	6.43e-08	0.00955	cagctgccgccaaagccgcca
Cucsa.353140	TALE	CsGA3ox1	645	664	+	20.5333	6.58e-08	0.00109	ctctctctctctctctctct
Cucsa.353140	TALE	CsGA3ox1	647	666	+	20.5333	6.58e-08	0.00109	ctctctctctctctctctct
Cucsa.353140	TALE	CsGA2ox1	1684	1703	+	20.5333	6.58e-08	0.00109	ctctctctctctctctctct
Cucsa.353140	TALE	CsGA2ox1	1686	1705	+	20.5333	6.58e-08	0.00109	ctctctctctctctctctct
Cucsa.353140	TALE	CsGA2ox1	1688	1707	+	20.5333	6.58e-08	0.00109	ctctctctctctctctctct
Cucsa.271720	ERF	CsDOXC55.2	1157	1175	+	20.625	6.63e-08	0.0117	agcccacagcggcggcggc
Cucsa.096740	bZIP	CsDOXB3.4	1807	1821	+	21.0625	6.66e-08	0.0236	cattctgacgtggca
Cucsa.277740	AP2	CsGA7ox2	1601	1620	+	19.0513	6.81e-08	0.000587	aaaaaagaaaaaaagaaaag
Cucsa.362960	MIKC_MADS	CsDOXC55.4	721	741	-	18.3913	6.87e-08	0.000527	TTTCTTTTTCTTTTTTTCCTT
Cucsa.362960	MIKC_MADS	CsDOXA6.3	1885	1905	-	18.3913	6.87e-08	0.000527	TTTTTTTTTCTTTTTTTCTTT
Cucsa.213830	Dof	CsDOXB3.3	142	162	-	18.125	6.88e-08	0.00171	TTTCCTTTTTTCTTTTTTTGT
Cucsa.213830	Dof	CsGA2ox5	1117	1137	+	18.125	6.88e-08	0.00171	ttttctttttcccctctcctt
Cucsa.197650	TCP	CsGA2ox3	1345	1364	-	17.6279	6.89e-08	0.0121	ATAGAGTATGTGGGGTCCAC
Cucsa.336890	ERF	CsDOXC55.2	1167	1177	-	20.9062	6.95e-08	0.0123	GCGCCGCCGCC
Cucsa.118340	NAC	CsGA2ox7	667	683	+	20.4177	7.05e-08	0.0249	cggcggggcttcaccgg
Cucsa.026600	BBR-BPC	CsDOXB1.2	305	328	+	17	7.09e-08	0.000327	gaaagggaaagaagaagagagaaa
Cucsa.098430	Dof	CsGA2ox3	843	863	+	17.1406	7.13e-08	0.00339	aagaaaaagaaaaagaagaaa
Cucsa.102120	Dof	CsDOXB3.3	139	167	-	18.4219	7.23e-08	0.00147	CTCCTTTTCCTTTTTTCTTTTTTTGTGTG
Cucsa.362960	MIKC_MADS	CsGA3ox1	652	672	+	18.3478	7.39e-08	0.000527	tctctctctctctctatctct
Cucsa.362960	MIKC_MADS	CsGA2ox1	1693	1713	+	18.3478	7.39e-08	0.000527	tctctctctctctctatctct
Cucsa.129320	ERF	CsDOXA6.1	1510	1524	+	20.8594	7.46e-08	0.00879	ccagcggcggcgatg
Cucsa.277740	AP2	CsDOXC17.2	264	283	-	18.9744	7.53e-08	0.000632	AAAAAAGTGGAGAAGAGAAG
Cucsa.102120	Dof	CsDOXC20.4	557	585	+	18.3906	7.54e-08	0.00147	cttccattcctatttactttttatttttt
Cucsa.102120	Dof	CsGA20ox3	1875	1903	+	18.3906	7.54e-08	0.00147	ttcttttggcttttctctttttctctttt
Cucsa.362960	MIKC_MADS	CsDOXC27.1	68	88	-	18.3333	7.59e-08	0.000527	TTTTTTTTTTTTTTTTTTTTT
Cucsa.362960	MIKC_MADS	CsDOXC27.1	69	89	-	18.3333	7.59e-08	0.000527	TTTTTTTTTTTTTTTTTTTTT
Cucsa.362960	MIKC_MADS	CsDOXC27.1	70	90	-	18.3333	7.59e-08	0.000527	TTTTTTTTTTTTTTTTTTTTT
Cucsa.362960	MIKC_MADS	CsDOXC27.1	71	91	-	18.3333	7.59e-08	0.000527	TTTTTTTTTTTTTTTTTTTTT
Cucsa.362960	MIKC_MADS	CsDOXC20.4	619	639	-	18.3333	7.59e-08	0.000527	TTTTTTTTTTTTTTTTTTTTT
Cucsa.362960	MIKC_MADS	CsDOXC20.4	620	640	-	18.3333	7.59e-08	0.000527	TTTTTTTTTTTTTTTTTTTTT
Cucsa.362960	MIKC_MADS	CsDOXC20.4	621	641	-	18.3333	7.59e-08	0.000527	TTTTTTTTTTTTTTTTTTTTT
Cucsa.362960	MIKC_MADS	CsDOXC20.4	622	642	-	18.3333	7.59e-08	0.000527	TTTTTTTTTTTTTTTTTTTTT
Cucsa.362960	MIKC_MADS	CsJOX2	1881	1901	-	18.3333	7.59e-08	0.000527	TTTTTTTTTTTTTTTTTTTTT
Cucsa.362960	MIKC_MADS	CsGA20ox3	1978	1998	-	18.3333	7.59e-08	0.000527	TTTTTTTTTTTTTTTTTTTTT
Cucsa.307870	C2H2	CsF3H1	1293	1311	-	20.161	7.62e-08	0.00332	CTGCTTCACCTTCCTCCTC
Cucsa.258940	bZIP	CsDOXB3.4	1807	1821	-	20.7969	7.68e-08	0.0233	TGCCACGTCAGAATG
Cucsa.136780	ERF	CsDOXC45.1	1002	1022	-	20.1765	7.7e-08	0.0271	AGACCTGGTGGTGGTGGCGGT
Cucsa.322110	bZIP	CsDOXC23.2	731	745	-	20.8594	7.74e-08	0.0274	GTTGTCGACGTGGCA
Cucsa.307870	C2H2	CsGA3ox1	1136	1154	-	20.1356	7.75e-08	0.00332	CCCCCTCTCACTCTTCCTC
Cucsa.362960	MIKC_MADS	CsGA3ox2	876	896	-	18.3188	7.77e-08	0.000528	TCTTTCTTTTTTTTTCTTCTT
Cucsa.026600	BBR-BPC	CsDOXC55.1	678	701	+	16.7969	7.78e-08	0.000336	gacaaactgagagggggagagggt
Cucsa.277740	AP2	CsDOXC52.2	1788	1807	-	18.9487	7.79e-08	0.000639	TATGAAAAGAGAGAGAGAGA
Cucsa.026600	BBR-BPC	CsGA2ox5	1034	1057	-	16.7812	7.83e-08	0.000336	GTGTGAGAGTGTGTGAGAGAAAGA
Cucsa.159750	BBR-BPC	CsGA3ox1	679	699	+	17.0822	7.85e-08	0.000487	ctctatctctatctatctatc
Cucsa.026600	BBR-BPC	CsDOXC37.1	1865	1888	-	16.7656	7.89e-08	0.000336	AATTGAGAGAGAGAGAAATAGAAA
Cucsa.352470	ERF	CsDOXA6.4	191	205	+	20.0938	7.94e-08	0.0281	cccgcaccaccgtcc
Cucsa.026600	BBR-BPC	CsDMR5	1237	1260	+	16.7344	8e-08	0.000336	gaaagaaagaaagaaagaaagaaa
Cucsa.026600	BBR-BPC	CsDMR5	1241	1264	+	16.7344	8e-08	0.000336	gaaagaaagaaagaaagaaagaaa
Cucsa.026600	BBR-BPC	CsDMR5	1245	1268	+	16.7344	8e-08	0.000336	gaaagaaagaaagaaagaaagaaa
Cucsa.026600	BBR-BPC	CsDMR5	1249	1272	+	16.7344	8e-08	0.000336	gaaagaaagaaagaaagaaagaaa
Cucsa.109420	bZIP	CsDOXB3.4	1807	1821	-	20.8125	8.02e-08	0.0284	TGCCACGTCAGAATG
Cucsa.026600	BBR-BPC	CsDMR5	1231	1254	+	16.7031	8.12e-08	0.000337	aataaagaaagaaagaaagaaaga
Cucsa.042770	ERF	CsDOXC55.2	1163	1183	-	20.1875	8.16e-08	0.00955	TTGATTGCGCCGCCGCCGCTG
Cucsa.277740	AP2	CsGA2ox3	1181	1200	-	18.8974	8.28e-08	0.000663	GGGAAAGAAAGAAAAAGAAA
Cucsa.088640	ERF	CsDOXC55.2	1164	1178	+	20.25	8.68e-08	0.0102	agcggcggcggcgca
Cucsa.353140	TALE	CsGA2ox1	1507	1526	+	20.1733	8.91e-08	0.00141	tctcccaccccccccccccc
Cucsa.098430	Dof	CsGA2ox3	831	851	+	17.0156	8.95e-08	0.00359	aaagaaaagaaaaagaaaaag
Cucsa.307870	C2H2	CsDOXC45.1	1354	1372	-	19.8983	9.13e-08	0.00332	CTTCTCCATCCTCTTCCCC
Cucsa.253400	ERF	CsDOXC55.2	1166	1180	-	20.4688	9.13e-08	0.0108	ATTGCGCCGCCGCCG
Cucsa.277740	AP2	CsGA2ox1	1743	1762	-	18.8205	9.19e-08	0.000718	GAGGGAGAGGGAGAGAGAGA
Cucsa.280310	GRAS	CsGA3ox1	646	665	-	18.3043	9.37e-08	0.00646	GAGAGAGAGAGAGAGAGAGA
Cucsa.280310	GRAS	CsGA2ox1	1685	1704	-	18.3043	9.37e-08	0.00646	GAGAGAGAGAGAGAGAGAGA
Cucsa.280310	GRAS	CsGA2ox1	1687	1706	-	18.3043	9.37e-08	0.00646	GAGAGAGAGAGAGAGAGAGA
Cucsa.159750	BBR-BPC	CsDMR2	251	271	+	16.6575	9.45e-08	0.000576	gaaaatctctctctctctcta
Cucsa.213830	Dof	CsGA2ox3	841	861	-	17.9062	9.51e-08	0.00179	TCTTCTTTTTCTTTTTCTTTT
Cucsa.102120	Dof	CsGA2ox1	1255	1283	-	18.2031	9.66e-08	0.00178	TTTTCTTTTTTTTTTACTTTATAACTTCA
Cucsa.307870	C2H2	CsD4H6	1238	1256	+	19.8136	9.68e-08	0.00332	tctcttcttccaccttctc
Cucsa.362960	MIKC_MADS	CsACO1	1723	1743	-	18.1884	9.68e-08	0.000645	CCTCTTTTTTTTTTTTTTTTC
Cucsa.231820	ERF	CsDMR1	322	336	-	20.1719	9.68e-08	0.00855	CCGTCGCCACCACCA
Cucsa.231820	ERF	CsDMR1	376	390	-	20.1719	9.68e-08	0.00855	CCGTCGCCACCACCA
Cucsa.098430	Dof	CsDOXC55.4	724	744	+	16.9688	9.71e-08	0.00359	gaaaaaaagaaaaagaaaaat
Cucsa.334870	ERF	CsDOXC20.1	173	187	-	19.8594	9.76e-08	0.017	CCACCCCGGCCGGCT
Cucsa.353140	TALE	CsACO3	1152	1171	-	20.0533	9.85e-08	0.00149	TATCCCCCCCCCCCCCCCCC
Cucsa.166230	TCP	CsGA2ox3	1394	1404	-	20.7344	1e-07	0.0118	GTGGGGCCCAG
Cucsa.359880	ERF	CsDOXA6.1	1120	1140	-	20.2188	1.01e-07	0.00989	TGGCGGCTTTGGCGGCAGCTG
Cucsa.362960	MIKC_MADS	CsGA2ox1	1270	1290	-	18.1594	1.02e-07	0.000664	TCTTTTCTTTTCTTTTTTTTT
Cucsa.213830	Dof	CsGA2ox3	823	843	-	17.8594	1.02e-07	0.00179	TTTTCTTTTCTTTTCTTTTTT
Cucsa.213830	Dof	CsGA2ox3	1048	1068	+	17.8594	1.02e-07	0.00179	ttttcttttcttttctttttt
Cucsa.277740	AP2	CsDOXC55.4	724	743	+	18.7308	1.03e-07	0.000769	gaaaaaaagaaaaagaaaaa
Cucsa.277740	AP2	CsGA2ox1	1819	1838	+	18.7308	1.03e-07	0.000769	agagaaaagaaaaagaaaaa
Cucsa.365320	ERF	CsDOXC55.2	1166	1180	-	20.125	1.05e-07	0.0124	ATTGCGCCGCCGCCG
Cucsa.252730	GATA	CsGA7ox1	154	172	-	19.6087	1.06e-07	0.00607	CATCATCATCATCTGAGTC
Cucsa.277740	AP2	CsDOXC37.2	717	736	-	18.6923	1.08e-07	0.000775	AAAGAGGAAGGGGAGAGAGA
Cucsa.098430	Dof	CsGA2ox3	837	857	+	16.9062	1.08e-07	0.0036	aagaaaaagaaaaagaaaaag
Cucsa.213830	Dof	CsDOXB1.2	1760	1780	-	17.8125	1.09e-07	0.00179	GTTTCTTTTTTCTTTTTTTCC
Cucsa.198560	Dof	CsDOXC3.2	703	716	-	14.8281	1.09e-07	0.018	CAAAAAGTGAAAAA
Cucsa.026600	BBR-BPC	CsGA3ox1	1136	1159	+	16.0469	1.09e-07	0.000448	gaggaagagtgagaggggggggta
Cucsa.277740	AP2	CsDOXC55.1	992	1011	-	18.6667	1.11e-07	0.000775	GGAAAAGAAAAGAAAAGAAA
Cucsa.359880	ERF	CsDOXA6.1	1505	1525	+	20.0625	1.12e-07	0.00989	caccaccagcggcggcgatga
Cucsa.277740	AP2	CsGA3ox1	648	667	-	18.6538	1.13e-07	0.000775	TAGAGAGAGAGAGAGAGAGA
Cucsa.277740	AP2	CsGA2ox1	1689	1708	-	18.6538	1.13e-07	0.000775	TAGAGAGAGAGAGAGAGAGA
Cucsa.026600	BBR-BPC	CsGA2ox1	1893	1916	-	15.9375	1.15e-07	0.000465	CAGAGGAAGAAAAAGAGAGTGTGA
Cucsa.194390	GATA	CsDOXB5.1	422	436	-	19.5	1.15e-07	0.0161	ACGTTGGTGGTGGTG
Cucsa.353140	TALE	CsGA2ox1	1520	1539	+	19.8667	1.15e-07	0.00167	ccccccccccccctttcttt
Cucsa.307870	C2H2	CsD4H4	231	249	-	19.5593	1.15e-07	0.00348	CTTCCTCTTCTACTTCCAC
Cucsa.118450	MYB	CsDOXC20.3	1930	1950	+	19.5781	1.16e-07	0.0408	cactctccccaccaaacactt
Cucsa.327980	MIKC_MADS	CsD4H4	1226	1237	-	17.9407	1.17e-07	0.0401	CCAAAAATGGAA
Cucsa.213830	Dof	CsDOXC55.4	716	736	-	17.75	1.19e-07	0.00179	TTTTCTTTTTTTCCTTTTGTT
Cucsa.213830	Dof	CsGA2ox1	1268	1288	-	17.75	1.19e-07	0.00179	TTTTCTTTTCTTTTTTTTTTA
Cucsa.362960	MIKC_MADS	CsDMR3	428	448	-	18.058	1.2e-07	0.000739	TTTCATTTTTTTTCTTTTTCC
Cucsa.362960	MIKC_MADS	CsGA7ox2	1606	1626	-	18.058	1.2e-07	0.000739	TTTTCCCTTTTCTTTTTTTCT
Cucsa.363020	TCP	CsGA2ox3	1425	1445	+	19.5735	1.2e-07	0.0425	tttatatacgtgggtcccaca
Cucsa.102120	Dof	CsDOXC37.2	717	745	+	18.0312	1.21e-07	0.00208	tctctctccccttcctctttttactctca
Cucsa.213830	Dof	CsDOXC3.2	706	726	+	17.7344	1.21e-07	0.00179	ttcactttttgtttttatttt
Cucsa.042770	ERF	CsDOXA6.1	1514	1534	-	19.625	1.22e-07	0.0107	TTGCGACCTTCATCGCCGCCG
Cucsa.308740	C2H2	CsDOXC21.4	1900	1910	-	14.25	1.22e-07	0.0433	GAGTGAAGGTG
Cucsa.026600	BBR-BPC	CsGA3ox1	1120	1143	+	15.7656	1.24e-07	0.000496	taggaagagaggaagagaggaaga
Cucsa.213830	Dof	CsGA20ox3	1453	1473	-	17.7188	1.24e-07	0.00179	TTTTCTTTTTATTTTTCTTTT
Cucsa.159750	BBR-BPC	CsDMR5	1237	1257	-	16.0274	1.24e-07	0.000705	CTTTCTTTCTTTCTTTCTTTC
Cucsa.159750	BBR-BPC	CsDMR5	1241	1261	-	16.0274	1.24e-07	0.000705	CTTTCTTTCTTTCTTTCTTTC
Cucsa.159750	BBR-BPC	CsDMR5	1245	1265	-	16.0274	1.24e-07	0.000705	CTTTCTTTCTTTCTTTCTTTC
Cucsa.159750	BBR-BPC	CsDMR5	1249	1269	-	16.0274	1.24e-07	0.000705	CTTTCTTTCTTTCTTTCTTTC
Cucsa.362960	MIKC_MADS	CsGA3ox1	648	668	+	18.029	1.25e-07	0.000739	tctctctctctctctctctat
Cucsa.362960	MIKC_MADS	CsGA2ox1	1689	1709	+	18.029	1.25e-07	0.000739	tctctctctctctctctctat
Cucsa.102120	Dof	CsDOXC55.4	720	748	-	18	1.25e-07	0.00208	CACTATTTTTCTTTTTCTTTTTTTCCTTT
Cucsa.213830	Dof	CsGA7ox2	1604	1624	-	17.7031	1.27e-07	0.00179	TTCCCTTTTCTTTTTTTCTTT
Cucsa.194390	GATA	CsDMR1	321	335	+	19.3824	1.27e-07	0.0161	atggtggtggcgacg
Cucsa.362960	MIKC_MADS	CsDOXC23.1	228	248	+	18.0145	1.28e-07	0.000739	gttttttctttttctttttct
Cucsa.362960	MIKC_MADS	CsDOXA6.5	1099	1119	-	18.0145	1.28e-07	0.000739	TCTCTCTCTCTCTTTTTTCTC
Cucsa.159750	BBR-BPC	CsDOXB1.3	1847	1867	-	15.9452	1.29e-07	0.000718	CTCAAATTCTCTCTCTCTCAA
Cucsa.112760	MYB	CsDOXC37.2	575	593	+	18.6719	1.29e-07	0.03	aaggtggtagttggaggcg
Cucsa.213830	Dof	CsDOXC27.1	995	1015	-	17.6875	1.29e-07	0.00179	TTTTCTTTTTTATTTTTTTAT
Cucsa.238410	bZIP	CsDOXB3.4	1809	1820	+	19.6709	1.3e-07	0.046	ttctgacgtggc
Cucsa.158340	MYB	CsGA2ox1	523	537	-	18.5312	1.31e-07	0.0228	TTTCCACCCACCACC
Cucsa.258940	bZIP	CsDOXC23.2	731	745	+	20.125	1.32e-07	0.0233	tgccacgtcgacaac
Cucsa.213830	Dof	CsGA3ox2	875	895	-	17.6719	1.32e-07	0.00179	CTTTCTTTTTTTTTCTTCTTT
Cucsa.026600	BBR-BPC	CsDMR2	254	277	-	15.5938	1.34e-07	0.000529	TATATATAGAGAGAGAGAGAGATT
Cucsa.277740	AP2	CsD4H6	1253	1272	-	18.5128	1.34e-07	0.000894	AAAAAAATGAAAGAAAGAGA
Cucsa.362960	MIKC_MADS	CsDOXC45.1	801	821	-	17.971	1.37e-07	0.000739	TCTTCTTTTCTTTTTCTTTTG
Cucsa.194390	GATA	CsGA7ox1	194	208	+	19.3088	1.37e-07	0.0161	atgctggtgatgatg
Cucsa.277740	AP2	CsGA3ox1	650	669	-	18.4872	1.38e-07	0.000894	GATAGAGAGAGAGAGAGAGA
Cucsa.277740	AP2	CsGA2ox1	1691	1710	-	18.4872	1.38e-07	0.000894	GATAGAGAGAGAGAGAGAGA
Cucsa.026600	BBR-BPC	CsGA3ox1	678	701	-	15.5	1.4e-07	0.000543	TAGATAGATAGATAGAGATAGAGA
Cucsa.362960	MIKC_MADS	CsGA2ox3	832	852	-	17.9565	1.4e-07	0.000739	TCTTTTTCTTTTTCTTTTCTT
Cucsa.362960	MIKC_MADS	CsGA2ox3	1181	1201	+	17.9565	1.4e-07	0.000739	tttctttttctttctttccca
Cucsa.026600	BBR-BPC	CsGA2ox2	1814	1837	-	15.4844	1.41e-07	0.000543	ACGAGAGAGAGAGGGGAGAAAAGA
Cucsa.353140	TALE	CsF3H2	211	230	+	19.6133	1.41e-07	0.00197	tcctctccctgcccctctct
Cucsa.159750	BBR-BPC	CsDOXC37.1	1870	1890	+	15.7123	1.42e-07	0.000777	atttctctctctctcaatttc
Cucsa.362960	MIKC_MADS	CsDOXC27.1	67	87	-	17.942	1.44e-07	0.000739	TTTTTTTTTTTTTTTTTTTTG
Cucsa.362960	MIKC_MADS	CsDOXC20.4	618	638	-	17.942	1.44e-07	0.000739	TTTTTTTTTTTTTTTTTTTTG
Cucsa.362960	MIKC_MADS	CsGA2ox1	1747	1767	+	17.942	1.44e-07	0.000739	tctctccctctccctcctttt
Cucsa.362960	MIKC_MADS	CsJOX1	1932	1952	-	17.942	1.44e-07	0.000739	TGTTTTTTTTTTTTTTTTTCT
Cucsa.362960	MIKC_MADS	CsACO3	1958	1978	-	17.942	1.44e-07	0.000739	TTTTTTTCTTTTCCTTTTTTT
Cucsa.159750	BBR-BPC	CsDOXA6.5	1104	1124	-	15.6849	1.44e-07	0.000777	CCTAGTCTCTCTCTCTCTTTT
Cucsa.277740	AP2	CsDOXC45.1	804	823	+	18.4487	1.45e-07	0.000917	aagaaaaagaaaagaagaag
Cucsa.334870	ERF	CsDOXC55.2	1163	1177	-	19.4375	1.45e-07	0.017	GCGCCGCCGCCGCTG
Cucsa.026600	BBR-BPC	CsGA3ox1	684	707	-	15.3594	1.49e-07	0.000567	GGGAGATAGATAGATAGATAGAGA
Cucsa.307870	C2H2	CsGA2ox1	1516	1534	+	19.1864	1.49e-07	0.00348	ccccccccccccccccctt
Cucsa.098430	Dof	CsACO4	788	808	+	16.7188	1.49e-07	0.00451	aagtagaagaaaaaggaaaag
Cucsa.362960	MIKC_MADS	CsDOXB1.2	310	330	-	17.913	1.5e-07	0.00074	TTTTTCTCTCTTCTTCTTTCC
Cucsa.362960	MIKC_MADS	CsGA2ox1	897	917	+	17.913	1.5e-07	0.00074	tctctttttttttttttttgt
Cucsa.362960	MIKC_MADS	CsACO4	1791	1811	+	17.8986	1.53e-07	0.00074	tctcttcttcttcttcttctt
Cucsa.362960	MIKC_MADS	CsGA2ox1	1899	1919	+	17.8986	1.53e-07	0.00074	tctctttttcttcctctgttt
Cucsa.277740	AP2	CsDMR2	1959	1978	-	18.3974	1.54e-07	0.000956	GAAAAAGAAAAAAAGAAAAG
Cucsa.307870	C2H2	CsGA2ox1	1750	1768	+	19.1271	1.55e-07	0.00348	ctccctctccctccttttc
Cucsa.238090	TCP	CsGA2ox3	1393	1422	+	19.2658	1.55e-07	0.0215	actgggccccacattttttaattttctcat
Cucsa.280310	GRAS	CsGA3ox1	606	625	+	17.8986	1.56e-07	0.00695	aagacagagacaaagacaaa
Cucsa.102120	Dof	CsGA3ox2	866	894	-	17.8281	1.56e-07	0.00243	TTTCTTTTTTTTTCTTCTTTCTTCTCTTT
Cucsa.026600	BBR-BPC	CsGA2ox1	844	867	-	15.25	1.56e-07	0.000588	GATGAAGAAAGAGAAATAGAGAGT
Cucsa.362960	MIKC_MADS	CsJOX1	1936	1956	-	17.8841	1.57e-07	0.00074	TTTCTGTTTTTTTTTTTTTTT
Cucsa.197650	TCP	CsDOXC23.1	1369	1388	-	15.2558	1.58e-07	0.0151	TTAGAGGTTGTGGATCCCAC
Cucsa.120870	NAC	CsDOXC23.1	282	298	-	18.3281	1.58e-07	0.0352	TGGCGTGATTCTCAAGC
Cucsa.026600	BBR-BPC	CsGA2ox1	1733	1756	-	15.1875	1.6e-07	0.000598	GAGGGAGAGAGAGATAGGGGTGAA
Cucsa.362960	MIKC_MADS	CsGA3ox2	874	894	-	17.8696	1.6e-07	0.00074	TTTCTTTTTTTTTCTTCTTTC
Cucsa.362960	MIKC_MADS	CsACO1	1364	1384	+	17.8696	1.6e-07	0.00074	ttttttcttttttctcctttt
Cucsa.277740	AP2	CsDOXC27.1	756	775	-	18.359	1.61e-07	0.000965	AAAGCAAAAAAAAAAAGAGA
Cucsa.277740	AP2	CsDOXC55.1	997	1016	-	18.359	1.61e-07	0.000965	AAAAAGGAAAAGAAAAGAAA
Cucsa.310360	ERF	CsDOXA6.1	1119	1139	+	17.6765	1.61e-07	0.0163	gcagctgccgccaaagccgcc
Cucsa.280310	GRAS	CsDOXB3.4	1944	1963	-	17.8696	1.61e-07	0.00695	GAGAGGGAGAGAGAGAGAGA
Cucsa.362960	MIKC_MADS	CsDOXC55.2	10	30	+	17.8551	1.64e-07	0.00074	ttcctttgtttttttcttttt
Cucsa.237150	ERF	CsDOXA6.1	1121	1140	+	19.0781	1.64e-07	0.0279	agctgccgccaaagccgcca
Cucsa.159750	BBR-BPC	CsGA3ox1	685	705	+	15.3288	1.67e-07	0.00088	ctctatctatctatctatctc
Cucsa.362960	MIKC_MADS	CsDOXC55.3	250	270	+	17.8406	1.67e-07	0.00074	tcttttttttttttttttttg
Cucsa.362960	MIKC_MADS	CsACO4	1794	1814	+	17.8406	1.67e-07	0.00074	cttcttcttcttcttcttctt
Cucsa.362960	MIKC_MADS	CsACO4	1797	1817	+	17.8406	1.67e-07	0.00074	cttcttcttcttcttcttctt
Cucsa.213830	Dof	CsDOXB1.1	895	915	+	17.5	1.67e-07	0.00213	atttctttttttttttttttt
Cucsa.307870	C2H2	CsGA2ox3	1971	1989	+	19.0085	1.68e-07	0.00348	cctcttcttctgcttcctc
Cucsa.159750	BBR-BPC	CsDMR2	259	279	+	15.3151	1.68e-07	0.00088	ctctctctctctatatatata
Cucsa.026600	BBR-BPC	CsDOXC37.2	709	732	-	15.0781	1.68e-07	0.00062	AGGAAGGGGAGAGAGAAATAAAGA
Cucsa.101370	ERF	CsDOXA6.1	1121	1139	-	19.4219	1.68e-07	0.0297	GGCGGCTTTGGCGGCAGCT
Cucsa.322110	bZIP	CsDOXB3.4	1807	1821	+	19.9688	1.68e-07	0.0298	cattctgacgtggca
Cucsa.277740	AP2	CsDMR5	1231	1250	+	18.3077	1.71e-07	0.00101	aataaagaaagaaagaaaga
Cucsa.213830	Dof	CsDOXC23.1	231	251	+	17.4844	1.71e-07	0.00213	ttttctttttctttttcttta
Cucsa.197650	TCP	CsACO4	763	782	+	15.0349	1.71e-07	0.0151	agaattgatgtgagacccac
Cucsa.026600	BBR-BPC	CsGA2ox1	1899	1922	-	15.0312	1.72e-07	0.000626	AAGAAACAGAGGAAGAAAAAGAGA
Cucsa.337320	MYB	CsDMR6	484	502	-	18.375	1.74e-07	0.0266	CCTCTTCAACTACCACTTC
Cucsa.307870	C2H2	CsD4H1	144	162	+	18.9576	1.74e-07	0.00348	cttccctttcttcttcctc
Cucsa.362960	MIKC_MADS	CsGA2ox3	842	862	-	17.8116	1.75e-07	0.000762	TTCTTCTTTTTCTTTTTCTTT
Cucsa.341290	Dof	CsDOXC3.2	701	721	-	16.3438	1.75e-07	0.00983	AAAAACAAAAAGTGAAAAAAT
Cucsa.307870	C2H2	CsACO4	1574	1592	-	18.9237	1.78e-07	0.00348	CCCCTACTTCCCCTTCCTC
Cucsa.112810	Dof	CsDOXC24.1	347	365	-	17.125	1.78e-07	0.016	AAAAGAAAAAAAGTGCATA
Cucsa.321150	ERF	CsDOXA6.1	1126	1146	+	18.875	1.78e-07	0.0157	ccgccaaagccgccacagcga
Cucsa.102120	Dof	CsGA20ox2	1960	1988	-	17.7188	1.79e-07	0.00243	TTTTATTTTCTTTTTCCTTTTTATTTGGA
Cucsa.280310	GRAS	CsGA3ox1	612	631	+	17.7826	1.79e-07	0.00695	gagacaaagacaaaaaaaca
Cucsa.238540	MYB	CsGA3ox1	1815	1828	+	15.9375	1.79e-07	0.0617	aaaggtaggtacaa
Cucsa.307870	C2H2	CsGA2ox1	1511	1529	+	18.8898	1.82e-07	0.00348	ccacccccccccccccccc
Cucsa.213830	Dof	CsGA2ox1	1817	1837	-	17.4375	1.82e-07	0.00217	TTTTCTTTTTCTTTTCTCTCA
Cucsa.280310	GRAS	CsF3H2	1825	1844	-	17.7681	1.82e-07	0.00695	CACAAAAAGAGAAAAAAAAA
Cucsa.307870	C2H2	CsDOXC45.1	1357	1375	-	18.8814	1.83e-07	0.00348	CTTCTTCTCCATCCTCTTC
Cucsa.026600	BBR-BPC	CsGA2ox1	1501	1524	-	14.875	1.84e-07	0.000664	GGGGGGGGGGGTGGGAGAGAGTGA
Cucsa.098430	Dof	CsGA2ox1	1819	1839	+	16.5938	1.84e-07	0.0051	agagaaaagaaaaagaaaaag
Cucsa.159750	BBR-BPC	CsGA3ox1	538	558	-	15.0822	1.85e-07	0.000955	TCCTCTCTCTCTCTTTTCCTT
Cucsa.196600	LBD	CsDOXC55.2	1161	1181	-	18.625	1.86e-07	0.029	GATTGCGCCGCCGCCGCTGTG
Cucsa.026600	BBR-BPC	CsGA2ox1	1895	1918	-	14.8438	1.86e-07	0.000666	AACAGAGGAAGAAAAAGAGAGTGT
Cucsa.277740	AP2	CsGA3ox1	1398	1417	+	18.2308	1.87e-07	0.00108	aagaagaagaataagagaga
Cucsa.112810	Dof	CsDOXB3.3	1907	1925	-	17.0781	1.89e-07	0.016	AGGAAGGAAAAAGGAAAAA
Cucsa.102120	Dof	CsDOXC17.2	261	289	+	17.6719	1.89e-07	0.00243	tttcttctcttctccacttttttttttca
Cucsa.104340	MYB	CsGA7ox2	860	880	-	17.5312	1.89e-07	0.0661	AAGGAAGTGGTAGGTGAAGTG
Cucsa.042770	ERF	CsDOXA6.1	1123	1143	+	18.9688	1.92e-07	0.0135	ctgccgccaaagccgccacag
Cucsa.231820	ERF	CsDOXA6.1	1511	1525	-	19.2344	1.96e-07	0.0139	TCATCGCCGCCGCTG
Cucsa.213830	Dof	CsDOXC20.4	569	589	+	17.375	1.98e-07	0.00217	tttactttttattttttggtt
Cucsa.362960	MIKC_MADS	CsF3H2	1819	1839	+	17.7246	1.99e-07	0.000856	tgcctttttttttttctcttt
Cucsa.277740	AP2	CsDOXC45.1	1622	1641	-	18.1795	1.99e-07	0.00113	AAGAAAGAAAAGAGAAGAGG
Cucsa.213830	Dof	CsD4H4	892	912	-	17.3594	2.02e-07	0.00217	TTCCCTTTTTCCTTTTCTTCT
Cucsa.213830	Dof	CsACO1	1724	1744	-	17.3594	2.02e-07	0.00217	GCCTCTTTTTTTTTTTTTTTT
Cucsa.280310	GRAS	CsGA20ox1	361	380	+	17.6812	2.02e-07	0.00695	gagagagagagagaaagaaa
Cucsa.277740	AP2	CsGA20ox1	361	380	+	18.1667	2.02e-07	0.00113	gagagagagagagaaagaaa
Cucsa.120870	NAC	CsDOXC52.2	1944	1960	-	18.1406	2.02e-07	0.0352	TGGCTTGAGTTTCAAGC
Cucsa.272130	Nin-like	CsDOXC55.2	493	507	+	17.6176	2.03e-07	0.0718	ggagcagcagcgcct
Cucsa.362960	MIKC_MADS	CsACO1	1722	1742	-	17.7101	2.03e-07	0.000864	CTCTTTTTTTTTTTTTTTTCT
Cucsa.353140	TALE	CsDOXC37.3	776	795	+	19.1333	2.06e-07	0.00276	tgtcccccctccccccctac
Cucsa.277740	AP2	CsGA2ox1	1276	1295	+	18.1538	2.06e-07	0.00113	aaagaaaagaaaagaagaaa
Cucsa.026600	BBR-BPC	CsDOXC21.2	256	279	+	14.6094	2.07e-07	0.000729	aaaaggaagagagatggagagtgg
Cucsa.046660	ERF	CsDOXA6.1	1125	1141	-	18.9062	2.08e-07	0.0245	GTGGCGGCTTTGGCGGC
Cucsa.102120	Dof	CsGA2ox3	822	850	-	17.5938	2.08e-07	0.00243	TTTTTCTTTTTCTTTTCTTTTCTTTTTTT
Cucsa.012850	ERF	CsDMR1	370	390	-	18.3529	2.08e-07	0.0144	CCGTCGCCACCACCAATCCCC
Cucsa.277740	AP2	CsGA2ox1	1270	1289	+	18.141	2.09e-07	0.00113	aaaaaaaaagaaaagaaaag
Cucsa.026600	BBR-BPC	CsGA3ox1	1406	1429	+	14.5625	2.11e-07	0.000729	gaataagagagaggtatagggaga
Cucsa.159750	BBR-BPC	CsGA3ox1	1128	1148	-	14.7671	2.11e-07	0.00106	CTCACTCTTCCTCTCTTCCTC
Cucsa.159750	BBR-BPC	CsGA2ox1	1736	1756	+	14.7671	2.11e-07	0.00106	acccctatctctctctccctc
Cucsa.362960	MIKC_MADS	CsGA20ox3	44	64	-	17.6812	2.12e-07	0.000868	TCTCTCTTACTCTCTCTCTCT
Cucsa.362960	MIKC_MADS	CsGA3ox4	728	748	+	17.6812	2.12e-07	0.000868	cttttttttctttctttttta
Cucsa.362960	MIKC_MADS	CsGA3ox2	873	893	-	17.6812	2.12e-07	0.000868	TTCTTTTTTTTTCTTCTTTCT
Cucsa.198560	Dof	CsJOX2	1746	1759	+	14.7656	2.13e-07	0.0234	caaaaaggaaaaaa
Cucsa.026600	BBR-BPC	CsGA2ox4	434	457	+	14.5312	2.14e-07	0.000729	gagatgaaaagagagacagagaat
Cucsa.098430	Dof	CsJOX2	1779	1799	-	16.5	2.14e-07	0.00537	AAAGAAAATAAAAAGGTAAAA
Cucsa.026600	BBR-BPC	CsGA2ox1	840	863	-	14.5156	2.15e-07	0.000729	AAGAAAGAGAAATAGAGAGTGATT
Cucsa.026600	BBR-BPC	CsGA2ox5	1640	1663	-	14.5156	2.15e-07	0.000729	ATGAGAGAAAGATAGGAAAAGGGA
Cucsa.102120	Dof	CsD4H4	896	924	-	17.5625	2.16e-07	0.00243	GCATTCTAACCTTTCCCTTTTTCCTTTTC
Cucsa.362960	MIKC_MADS	CsDOXB3.3	142	162	-	17.6667	2.16e-07	0.000875	TTTCCTTTTTTCTTTTTTTGT
Cucsa.026600	BBR-BPC	CsDOXC37.1	1863	1886	-	14.4688	2.2e-07	0.000737	TTGAGAGAGAGAGAAATAGAAATT
Cucsa.353140	TALE	CsACO3	1157	1176	-	19.04	2.21e-07	0.00281	TTTCCTATCCCCCCCCCCCC
Cucsa.277740	AP2	CsDOXB1.2	299	318	+	18.0897	2.21e-07	0.00118	ggagaagaaagggaaagaag
Cucsa.238090	TCP	CsDOXC21.4	240	269	-	18.6203	2.22e-07	0.0215	AAGGGGCCCCACCCTCTCATTGGCCCGAGA
Cucsa.252730	GATA	CsGA7ox1	166	184	-	18.3623	2.22e-07	0.0105	CATCTTGATCGTCATCATC
Cucsa.341290	Dof	CsGA20ox2	1968	1988	+	16.2031	2.23e-07	0.0107	aaaaggaaaaagaaaataaaa
Cucsa.026600	BBR-BPC	CsGA2ox5	1638	1661	-	14.4219	2.24e-07	0.000745	GAGAGAAAGATAGGAAAAGGGAAA
Cucsa.353140	TALE	CsDOXB3.4	1951	1970	+	19.0133	2.26e-07	0.00281	ctctctccctctcgcgcgcg
Cucsa.098430	Dof	CsGA2ox3	1178	1198	-	16.4688	2.26e-07	0.00537	GAAAGAAAGAAAAAGAAAAAT
Cucsa.102120	Dof	CsDOXA6.2	1349	1377	-	17.5156	2.29e-07	0.00243	TATTTTTTAATTTTTACTTTTTAATCTAT
Cucsa.337320	MYB	CsFLS1	365	383	-	18.1406	2.3e-07	0.0266	CATCTCCAACTACCGCTCT
Cucsa.362960	MIKC_MADS	CsGA20ox3	1878	1898	+	17.6232	2.3e-07	0.000908	ttttggcttttctctttttct
Cucsa.362960	MIKC_MADS	CsDMR2	1963	1983	+	17.6232	2.3e-07	0.000908	tctttttttctttttcctttt
Cucsa.352470	ERF	CsDOXC45.1	1003	1017	+	19	2.31e-07	0.0295	ccgccaccaccacca
Cucsa.391680	C2H2	CsGA2ox1	1910	1921	-	18.7945	2.32e-07	0.0529	AGAAACAGAGGA
Cucsa.159750	BBR-BPC	CsDOXA6.5	1102	1122	-	14.5479	2.32e-07	0.00113	TAGTCTCTCTCTCTCTTTTTT
Cucsa.159750	BBR-BPC	CsDOXB3.4	1935	1955	+	14.5342	2.33e-07	0.00113	cgataactctctctctctctc
Cucsa.213830	Dof	CsDOXC55.3	247	267	+	17.25	2.33e-07	0.00217	tattctttttttttttttttt
Cucsa.102120	Dof	CsDOXC45.1	794	822	-	17.5	2.33e-07	0.00243	TTCTTCTTTTCTTTTTCTTTTGCTCCGTC
Cucsa.136780	ERF	CsDOXA6.1	1125	1145	-	18.3971	2.34e-07	0.0362	CGCTGTGGCGGCTTTGGCGGC
Cucsa.104970	bZIP	CsDOXC23.2	731	740	-	15.8617	2.34e-07	0.0828	CGACGTGGCA
Cucsa.012850	ERF	CsDOXC45.1	1003	1023	+	18.1471	2.34e-07	0.0144	ccgccaccaccaccaggtcta
Cucsa.362960	MIKC_MADS	CsACO1	1721	1741	-	17.6087	2.35e-07	0.000908	TCTTTTTTTTTTTTTTTTCTT
Cucsa.362960	MIKC_MADS	CsACO3	1818	1838	+	17.6087	2.35e-07	0.000908	tttttgtttttttttttttct
Cucsa.159750	BBR-BPC	CsGA2ox1	1698	1718	+	14.4932	2.37e-07	0.00113	ctctctctctatctctccaaa
Cucsa.102120	Dof	CsGA2ox3	1046	1074	+	17.4844	2.37e-07	0.00243	tcttttcttttcttttcttttttaccctt
Cucsa.277740	AP2	CsDOXC52.3	929	948	+	18.0256	2.38e-07	0.0012	gggaaggaaggaaagagaaa
Cucsa.277740	AP2	CsDOXB3.4	1944	1963	-	18.0256	2.38e-07	0.0012	GAGAGGGAGAGAGAGAGAGA
Cucsa.026600	BBR-BPC	CsF3H2	208	231	-	14.2656	2.4e-07	0.000789	TAGAGAGGGGCAGGGAGAGGAAGA
Cucsa.362960	MIKC_MADS	CsGA3ox1	1121	1141	-	17.5942	2.4e-07	0.000917	TTCCTCTCTTCCTCTCTTCCT
Cucsa.277740	AP2	CsGA2ox1	1268	1287	+	18.0128	2.42e-07	0.0012	taaaaaaaaaagaaaagaaa
Cucsa.277740	AP2	CsGA2ox5	1318	1337	-	18.0128	2.42e-07	0.0012	GATAAAAAGAAAAAGAAAGG
Cucsa.102120	Dof	CsGA2ox3	1016	1044	+	17.4688	2.42e-07	0.00243	tcttttcttttcttttcttttcttttctt
Cucsa.102120	Dof	CsGA2ox3	1021	1049	+	17.4688	2.42e-07	0.00243	tcttttcttttcttttcttttcttttctt
Cucsa.102120	Dof	CsGA2ox3	1026	1054	+	17.4688	2.42e-07	0.00243	tcttttcttttcttttcttttcttttctt
Cucsa.102120	Dof	CsGA2ox3	1031	1059	+	17.4688	2.42e-07	0.00243	tcttttcttttcttttcttttcttttctt
Cucsa.102120	Dof	CsGA2ox3	1036	1064	+	17.4688	2.42e-07	0.00243	tcttttcttttcttttcttttcttttctt
Cucsa.252730	GATA	CsDMR2	188	206	-	18.1884	2.45e-07	0.0105	CACCATCTTCATCTTCTTC
Cucsa.026600	BBR-BPC	CsGA20ox1	872	895	+	14.2188	2.45e-07	0.000797	gggggaaagagagggagagcagcc
Cucsa.362960	MIKC_MADS	CsGA20ox3	1884	1904	+	17.5797	2.45e-07	0.000926	cttttctctttttctctttta
Cucsa.175390	Dof	CsLBO1	676	690	-	15.6719	2.45e-07	0.0341	TTTTTTCCCTTTTTG
Cucsa.238090	TCP	CsACO3	1711	1740	+	18.4304	2.46e-07	0.0215	agtgggtcccattcccttaactccaagctt
Cucsa.012850	ERF	CsDOXA6.1	1505	1525	-	18.0588	2.46e-07	0.0144	TCATCGCCGCCGCTGGTGGTG
Cucsa.310360	ERF	CsDOXC45.1	996	1016	+	16.8529	2.48e-07	0.0163	actgataccgccaccaccacc
Cucsa.213830	Dof	CsGA2ox3	1018	1038	+	17.2031	2.48e-07	0.00217	ttttcttttcttttcttttct
Cucsa.213830	Dof	CsGA2ox3	1023	1043	+	17.2031	2.48e-07	0.00217	ttttcttttcttttcttttct
Cucsa.213830	Dof	CsGA2ox3	1028	1048	+	17.2031	2.48e-07	0.00217	ttttcttttcttttcttttct
Cucsa.213830	Dof	CsGA2ox3	1033	1053	+	17.2031	2.48e-07	0.00217	ttttcttttcttttcttttct
Cucsa.213830	Dof	CsGA2ox3	1038	1058	+	17.2031	2.48e-07	0.00217	ttttcttttcttttcttttct
Cucsa.213830	Dof	CsGA2ox3	1043	1063	+	17.2031	2.48e-07	0.00217	ttttcttttcttttcttttct
Cucsa.277740	AP2	CsGA2ox1	897	916	-	17.9872	2.49e-07	0.0012	CAAAAAAAAAAAAAAAGAGA
Cucsa.352470	ERF	CsLBO1	663	677	+	18.9062	2.5e-07	0.0295	ccaccgccaccaaca
Cucsa.362960	MIKC_MADS	CsACO1	1725	1745	-	17.5652	2.5e-07	0.000934	TGCCTCTTTTTTTTTTTTTTT
Cucsa.112760	MYB	CsDOXA6.4	114	132	-	18.1094	2.51e-07	0.03	TGGTTAGTGGTTGGGATGA
Cucsa.102120	Dof	CsGA2ox1	1815	1843	-	17.4375	2.51e-07	0.00244	ATTTCTTTTTCTTTTTCTTTTCTCTCAAT
Cucsa.310360	ERF	CsDOXC45.1	1002	1022	+	16.8235	2.51e-07	0.0163	accgccaccaccaccaggtct
Cucsa.307870	C2H2	CsACO4	1794	1812	+	18.3983	2.52e-07	0.00411	cttcttcttcttcttcttc
Cucsa.307870	C2H2	CsACO4	1797	1815	+	18.3983	2.52e-07	0.00411	cttcttcttcttcttcttc
Cucsa.307870	C2H2	CsACO4	1800	1818	+	18.3983	2.52e-07	0.00411	cttcttcttcttcttcttc
Cucsa.231820	ERF	CsLBO1	663	677	+	18.8594	2.53e-07	0.0149	ccaccgccaccaaca
Cucsa.277740	AP2	CsDOXB1.2	1760	1779	+	17.9744	2.53e-07	0.0012	ggaaaaaaagaaaaaagaaa
Cucsa.277740	AP2	CsACO3	1820	1839	-	17.9744	2.53e-07	0.0012	AAGAAAAAAAAAAAAACAAA
Cucsa.362960	MIKC_MADS	CsGA7ox2	1600	1620	-	17.5507	2.55e-07	0.000944	CTTTTCTTTTTTTCTTTTTTA
Cucsa.112760	MYB	CsGA2ox5	908	926	+	18.0938	2.56e-07	0.03	agtgtagtagttgggagag
Cucsa.242740	C3H	CsDOXC23.1	539	552	-	14.3281	2.56e-07	0.0423	AAAGAAAAAGGTGA
Cucsa.353140	TALE	CsF3H2	203	222	+	18.84	2.58e-07	0.00303	ccttttcttcctctccctgc
Cucsa.213830	Dof	CsDOXC55.1	996	1016	+	17.1719	2.58e-07	0.00219	ttttcttttcttttccttttt
Cucsa.026600	BBR-BPC	CsDOXC37.1	1869	1892	-	14.0938	2.58e-07	0.000831	CTGAAATTGAGAGAGAGAGAAATA
Cucsa.325250	CAMTA	CsGA2ox5	1542	1559	+	18.0781	2.6e-07	0.0757	acgtgtgtgcaacgtgta
Cucsa.026600	BBR-BPC	CsGA2ox2	1810	1833	-	14.0781	2.6e-07	0.000831	GAGAGAGAGGGGAGAAAAGAGAGT
Cucsa.353140	TALE	CsGA2ox1	1509	1528	+	18.8267	2.6e-07	0.00303	tcccaccccccccccccccc
Cucsa.159750	BBR-BPC	CsDMR5	1257	1277	-	14.2603	2.61e-07	0.00123	ATCTATTTCTTTCTTTCTTTC
Cucsa.102120	Dof	CsF3H2	1820	1848	+	17.4062	2.61e-07	0.00244	gcctttttttttttctctttttgtgttac
Cucsa.112090	C2H2	CsD4H8	870	884	+	18.1719	2.62e-07	0.0895	caaataagacaaaat
Cucsa.213830	Dof	CsGA7ox2	1599	1619	-	17.1562	2.63e-07	0.00219	TTTTCTTTTTTTCTTTTTTAA
Cucsa.102120	Dof	CsACO1	1364	1392	+	17.3906	2.66e-07	0.00244	ttttttcttttttctcctttttcaatgtg
Cucsa.362960	MIKC_MADS	CsDOXC55.3	249	269	+	17.5217	2.66e-07	0.000952	ttctttttttttttttttttt
Cucsa.362960	MIKC_MADS	CsDOXC52.1	1029	1049	+	17.5217	2.66e-07	0.000952	ttttgttttttttctcctttt
Cucsa.362960	MIKC_MADS	CsDMR2	1966	1986	+	17.5217	2.66e-07	0.000952	ttttttctttttccttttttc
Cucsa.341290	Dof	CsACO3	1960	1980	+	16.0938	2.67e-07	0.0112	aaaaaggaaaagaaaaaaaca
Cucsa.364380	bZIP	CsDOXC23.2	122	136	+	19.3438	2.68e-07	0.0949	gttggtcacgtggct
Cucsa.277740	AP2	CsGA2ox1	1745	1764	-	17.9231	2.69e-07	0.0012	AGGAGGGAGAGGGAGAGAGA
Cucsa.196600	LBD	CsDOXC55.2	1158	1178	-	18	2.7e-07	0.029	TGCGCCGCCGCCGCTGTGGGC
Cucsa.166230	TCP	CsACO3	1712	1722	+	19.3125	2.7e-07	0.0239	gtgggtcccat
Cucsa.258270	MYB	CsGA7ox2	863	877	-	17.8906	2.73e-07	0.0941	GAAGTGGTAGGTGAA
Cucsa.353140	TALE	CsDOXB3.4	1941	1960	+	18.76	2.74e-07	0.00308	ctctctctctctctctccct
Cucsa.213830	Dof	CsDOXB3.3	148	168	-	17.125	2.74e-07	0.00222	GCTCCTTTTCCTTTTTTCTTT
Cucsa.026600	BBR-BPC	CsDMR5	1253	1276	+	13.9531	2.75e-07	0.000868	gaaagaaagaaagaaagaaataga
Cucsa.359570	GATA	CsGA7ox1	192	206	-	17.5312	2.76e-07	0.0225	TCATCACCAGCATCA
Cucsa.277740	AP2	CsD4H4	1010	1029	+	17.8974	2.76e-07	0.0012	aaaaaagaaaagaaaaaaga
Cucsa.362960	MIKC_MADS	CsGA7ox2	1604	1624	-	17.4928	2.77e-07	0.00098	TTCCCTTTTCTTTTTTTCTTT
Cucsa.310360	ERF	CsDOXA6.1	1125	1145	+	16.6324	2.77e-07	0.0163	gccgccaaagccgccacagcg
Cucsa.258940	bZIP	CsDOXC23.2	122	136	-	19.1719	2.79e-07	0.0329	AGCCACGTGACCAAC
Cucsa.307870	C2H2	CsACO3	1145	1163	-	18.2288	2.81e-07	0.00439	CCCCCCCCCCCCCCCCAAC
Cucsa.159750	BBR-BPC	CsGA2ox1	843	863	+	14.0685	2.82e-07	0.00131	cactctctatttctctttctt
Cucsa.353140	TALE	CsACO3	1155	1174	-	18.72	2.82e-07	0.00308	TCCTATCCCCCCCCCCCCCC
Cucsa.277740	AP2	CsDOXC55.1	1141	1160	+	17.8718	2.84e-07	0.0012	tggaagaaaaaaaagagaga
Cucsa.158340	MYB	CsDOXA6.4	116	130	+	17.7969	2.84e-07	0.029	atcccaaccactaac
Cucsa.349500	TCP	CsGA2ox3	1396	1405	+	18.6154	2.85e-07	0.0504	gggccccaca
Cucsa.338950	ZF-HD	CsGA2ox5	9	23	-	14.5588	2.9e-07	0.0318	TTTCATCCCTAATCA
Cucsa.338950	ZF-HD	CsGA2ox5	40	54	-	14.5588	2.9e-07	0.0318	TTTCATCCCTAATCA
Cucsa.338950	ZF-HD	CsGA2ox5	71	85	-	14.5588	2.9e-07	0.0318	TTTCATCCCTAATCA
Cucsa.242740	C3H	CsD4H4	899	912	+	14.2656	2.91e-07	0.0423	aaggaaaaagggaa
Cucsa.102120	Dof	CsACO3	1953	1981	-	17.3125	2.91e-07	0.00261	ATGTTTTTTTCTTTTCCTTTTTTTGTGTG
Cucsa.362960	MIKC_MADS	CsACO4	1800	1820	+	17.4493	2.94e-07	0.00101	cttcttcttcttcttcttctg
Cucsa.362960	MIKC_MADS	CsGA2ox1	1820	1840	-	17.4493	2.94e-07	0.00101	TCTTTTTCTTTTTCTTTTCTC
Cucsa.396070	bZIP	CsDOXB3.4	1809	1826	-	19.1562	2.95e-07	0.0662	CAAAATGCCACGTCAGAA
Cucsa.277740	AP2	CsDMR5	1237	1256	+	17.8333	2.98e-07	0.0012	gaaagaaagaaagaaagaaa
Cucsa.277740	AP2	CsDMR5	1241	1260	+	17.8333	2.98e-07	0.0012	gaaagaaagaaagaaagaaa
Cucsa.277740	AP2	CsDMR5	1245	1264	+	17.8333	2.98e-07	0.0012	gaaagaaagaaagaaagaaa
Cucsa.277740	AP2	CsDMR5	1249	1268	+	17.8333	2.98e-07	0.0012	gaaagaaagaaagaaagaaa
Cucsa.277740	AP2	CsDMR5	1253	1272	+	17.8333	2.98e-07	0.0012	gaaagaaagaaagaaagaaa
Cucsa.277740	AP2	CsACO1	1721	1740	+	17.8333	2.98e-07	0.0012	aagaaaaaaaaaaaaaaaag
Cucsa.143260	bHLH	CsDMR4	1881	1894	+	17.2188	2.99e-07	0.103	ttagcaacttgcct
Cucsa.197650	TCP	CsGA2ox3	1425	1444	+	13.5116	2.99e-07	0.0211	tttatatacgtgggtcccac
Cucsa.362960	MIKC_MADS	CsGA2ox1	1275	1295	-	17.4348	3e-07	0.00101	TTTCTTCTTTTCTTTTCTTTT
Cucsa.362960	MIKC_MADS	CsACO1	1720	1740	-	17.4348	3e-07	0.00101	CTTTTTTTTTTTTTTTTCTTC
Cucsa.362960	MIKC_MADS	CsJOX2	1883	1903	-	17.4348	3e-07	0.00101	CGTTTTTTTTTTTTTTTTTTT
Cucsa.175390	Dof	CsJOX2	1746	1760	-	15.5781	3.01e-07	0.0341	TTTTTTTCCTTTTTG
Cucsa.336890	ERF	CsDOXC45.1	1003	1013	+	19.0312	3.02e-07	0.0356	ccgccaccacc
Cucsa.237150	ERF	CsDOXC45.1	998	1017	+	18.1875	3.04e-07	0.0279	tgataccgccaccaccacca
Cucsa.362840	LBD	CsD4H7	25	43	-	18	3.04e-07	0.107	TTTCCGGCAGGTCTTGCGG
Cucsa.353140	TALE	CsACO3	1142	1161	-	18.6133	3.06e-07	0.00323	CCCCCCCCCCCCCCAACGAC
Cucsa.277740	AP2	CsGA3ox1	1128	1147	+	17.8077	3.06e-07	0.0012	gaggaagagaggaagagtga
Cucsa.363020	TCP	CsGA2ox3	1336	1356	+	17.7941	3.07e-07	0.0541	ttccatgcagtggaccccaca
Cucsa.102120	Dof	CsGA2ox3	1041	1069	+	17.2656	3.08e-07	0.00268	tcttttcttttcttttcttttctttttta
Cucsa.159750	BBR-BPC	CsDOXA6.5	1106	1126	-	13.8493	3.08e-07	0.0014	TCCCTAGTCTCTCTCTCTCTT
Cucsa.213830	Dof	CsGA2ox3	1180	1200	+	17.0312	3.08e-07	0.0023	ttttctttttctttctttccc
Cucsa.156340	MYB	CsGA7ox2	863	875	+	16.5294	3.1e-07	0.107	ttcacctaccact
Cucsa.277740	AP2	CsDOXC55.3	250	269	-	17.7949	3.11e-07	0.0012	AAAAAAAAAAAAAAAAAAGA
Cucsa.277740	AP2	CsJOX1	1935	1954	+	17.7949	3.11e-07	0.0012	aaaaaaaaaaaaaaaacaga
Cucsa.337320	MYB	CsDOXA6.4	218	236	+	17.875	3.11e-07	0.0271	caactccacccacctttca
Cucsa.362960	MIKC_MADS	CsGA2ox3	830	850	-	17.4058	3.12e-07	0.00103	TTTTTCTTTTTCTTTTCTTTT
Cucsa.159750	BBR-BPC	CsGA20ox3	41	61	-	13.8082	3.13e-07	0.0014	CTCTTACTCTCTCTCTCTAAG
Cucsa.159750	BBR-BPC	CsGA2ox5	1641	1661	+	13.8082	3.13e-07	0.0014	cccttttcctatctttctctc
Cucsa.006170	MYB	CsGA7ox2	862	874	-	17.2658	3.15e-07	0.0991	GTGGTAGGTGAAG
Cucsa.012850	ERF	CsDOXA6.4	194	214	+	17.6176	3.15e-07	0.0158	gcaccaccgtccctcccaccc
Cucsa.213830	Dof	CsDOXC27.1	755	775	+	17.0156	3.15e-07	0.0023	ttctctttttttttttgcttt
Cucsa.213830	Dof	CsACO1	1366	1386	+	17.0156	3.15e-07	0.0023	ttttcttttttctcctttttc
Cucsa.252730	GATA	CsDOXC17.1	702	720	-	17.7391	3.16e-07	0.0121	CATGATGATCAACATCTTC
Cucsa.237150	ERF	CsDOXA6.1	1511	1530	-	18.125	3.17e-07	0.0279	GACCTTCATCGCCGCCGCTG
Cucsa.321150	ERF	CsDOXC45.1	997	1017	+	17.7344	3.17e-07	0.0224	ctgataccgccaccaccacca
Cucsa.362960	MIKC_MADS	CsDOXC20.4	617	637	-	17.3913	3.18e-07	0.00103	TTTTTTTTTTTTTTTTTTTGT
Cucsa.362960	MIKC_MADS	CsDOXC3.1	659	679	-	17.3913	3.18e-07	0.00103	TTTTTTTTTTTTTTTTTTTGT
Cucsa.362960	MIKC_MADS	CsGA3ox1	1123	1143	-	17.3913	3.18e-07	0.00103	TCTTCCTCTCTTCCTCTCTTC
Cucsa.213830	Dof	CsDOXA6.5	1599	1619	+	17	3.21e-07	0.0023	ttctcttttttacttttttta
Cucsa.213830	Dof	CsACO1	1651	1671	-	17	3.21e-07	0.0023	TTTACTTTTCCCCATTTCTCT
Cucsa.359990	Trihelix	CsDOXB3.2	148	158	+	18.6562	3.23e-07	0.114	tcgccggaaat
Cucsa.178830	LBD	CsDOXA6.1	1514	1534	-	18.0625	3.23e-07	0.0569	TTGCGACCTTCATCGCCGCCG
Cucsa.277740	AP2	CsD4H6	1251	1270	-	17.7564	3.24e-07	0.0012	AAAAATGAAAGAAAGAGAAG
Cucsa.213830	Dof	CsDOXC55.3	237	257	+	16.9844	3.27e-07	0.0023	ttttcttttctattctttttt
Cucsa.159750	BBR-BPC	CsDMR5	1233	1253	-	13.6849	3.29e-07	0.00143	CTTTCTTTCTTTCTTTCTTTA
Cucsa.159750	BBR-BPC	CsDOXC37.1	1862	1882	+	13.6849	3.29e-07	0.00143	taatttctatttctctctctc
Cucsa.026600	BBR-BPC	CsGA3ox1	680	703	-	13.5156	3.31e-07	0.00104	GATAGATAGATAGATAGAGATAGA
Cucsa.158340	MYB	CsF6H1	1587	1601	+	17.6406	3.32e-07	0.029	ttcctaaccacctcc
Cucsa.362960	MIKC_MADS	CsGA2ox3	824	844	-	17.3478	3.37e-07	0.00108	TTTTTCTTTTCTTTTCTTTTT
Cucsa.277740	AP2	CsGA2ox1	1357	1376	+	17.7179	3.38e-07	0.0012	agagaagagaagagaagagg
Cucsa.042770	ERF	CsLBO1	654	674	+	18.125	3.39e-07	0.0175	tcccattttccaccgccacca
Cucsa.312570	ERF	CsDOXB6.1	819	834	-	19.0312	3.39e-07	0.12	AACCACCGACAAAAGT
Cucsa.251110	TCP	CsDOXC21.4	258	267	-	18.0213	3.4e-07	0.0705	GGGGCCCCAC
Cucsa.054000	TCP	CsDOXC21.4	258	266	-	18.6915	3.42e-07	0.0606	GGGCCCCAC
Cucsa.054000	TCP	CsGA2ox3	1396	1404	+	18.6915	3.42e-07	0.0606	gggccccac
Cucsa.310360	ERF	CsDOXC55.2	1158	1178	-	16.2206	3.42e-07	0.0172	TGCGCCGCCGCCGCTGTGGGC
Cucsa.102120	Dof	CsGA2ox3	839	867	-	17.1719	3.43e-07	0.00292	GACGTTTCTTCTTTTTCTTTTTCTTTTTC
Cucsa.141980	ERF	CsDOXA6.4	194	207	-	18.2031	3.48e-07	0.123	AGGGACGGTGGTGC
Cucsa.391680	C2H2	CsDOXB1.2	1504	1515	+	18.7397	3.49e-07	0.0529	aaaaacagagga
Cucsa.241900	Dof	CsLBO1	676	686	+	13.8281	3.49e-07	0.118	caaaaagggaa
Cucsa.362960	MIKC_MADS	CsDOXC20.4	623	643	-	17.3188	3.51e-07	0.00108	GTTTTTTTTTTTTTTTTTTTT
Cucsa.362960	MIKC_MADS	CsD4H4	1007	1027	-	17.3188	3.51e-07	0.00108	TTTTTTCTTTTCTTTTTTTGT
Cucsa.362960	MIKC_MADS	CsJOX2	1882	1902	-	17.3188	3.51e-07	0.00108	GTTTTTTTTTTTTTTTTTTTT
Cucsa.362960	MIKC_MADS	CsGA20ox3	1979	1999	-	17.3188	3.51e-07	0.00108	GTTTTTTTTTTTTTTTTTTTT
Cucsa.277740	AP2	CsGA2ox3	835	854	+	17.6795	3.52e-07	0.0012	aaaagaaaaagaaaaagaaa
Cucsa.277740	AP2	CsGA2ox1	1823	1842	+	17.6795	3.52e-07	0.0012	aaaagaaaaagaaaaagaaa
Cucsa.102530	bHLH	CsD4H8	1304	1312	+	16.6489	3.52e-07	0.125	cccacgtgc
Cucsa.280310	GRAS	CsGA2ox1	1739	1758	-	17.1884	3.53e-07	0.00921	GAGAGGGAGAGAGAGATAGG
Cucsa.194390	GATA	CsGA7ox1	161	175	+	18.25	3.53e-07	0.0219	atgatgatgatgacg
Cucsa.196600	LBD	CsDOXA6.1	1512	1532	-	17.5312	3.56e-07	0.029	GCGACCTTCATCGCCGCCGCT
Cucsa.026600	BBR-BPC	CsGA20ox3	41	64	+	13.3438	3.56e-07	0.00111	cttagagagagagagtaagagaga
Cucsa.362960	MIKC_MADS	CsGA2ox3	844	864	-	17.3043	3.57e-07	0.00108	GTTTCTTCTTTTTCTTTTTCT
Cucsa.277740	AP2	CsDOXA6.3	1886	1905	+	17.6667	3.57e-07	0.0012	aagaaaaaaagaaaaaaaaa
Cucsa.271720	ERF	CsDOXC45.1	1002	1020	-	18.125	3.6e-07	0.0327	ACCTGGTGGTGGTGGCGGT
Cucsa.277740	AP2	CsDOXC27.1	68	87	+	17.6538	3.63e-07	0.0012	aaaaaaaaaaaaaaaaaaaa
Cucsa.277740	AP2	CsDOXC27.1	69	88	+	17.6538	3.63e-07	0.0012	aaaaaaaaaaaaaaaaaaaa
Cucsa.277740	AP2	CsDOXC27.1	70	89	+	17.6538	3.63e-07	0.0012	aaaaaaaaaaaaaaaaaaaa
Cucsa.277740	AP2	CsDOXC27.1	71	90	+	17.6538	3.63e-07	0.0012	aaaaaaaaaaaaaaaaaaaa
Cucsa.277740	AP2	CsDOXC27.1	72	91	+	17.6538	3.63e-07	0.0012	aaaaaaaaaaaaaaaaaaaa
Cucsa.277740	AP2	CsDOXC20.4	619	638	+	17.6538	3.63e-07	0.0012	aaaaaaaaaaaaaaaaaaaa
Cucsa.277740	AP2	CsDOXC20.4	620	639	+	17.6538	3.63e-07	0.0012	aaaaaaaaaaaaaaaaaaaa
Cucsa.277740	AP2	CsDOXC20.4	621	640	+	17.6538	3.63e-07	0.0012	aaaaaaaaaaaaaaaaaaaa
Cucsa.277740	AP2	CsDOXC20.4	622	641	+	17.6538	3.63e-07	0.0012	aaaaaaaaaaaaaaaaaaaa
Cucsa.277740	AP2	CsDOXC20.4	623	642	+	17.6538	3.63e-07	0.0012	aaaaaaaaaaaaaaaaaaaa
Cucsa.277740	AP2	CsJOX2	1881	1900	+	17.6538	3.63e-07	0.0012	aaaaaaaaaaaaaaaaaaaa
Cucsa.277740	AP2	CsJOX2	1882	1901	+	17.6538	3.63e-07	0.0012	aaaaaaaaaaaaaaaaaaaa
Cucsa.277740	AP2	CsGA20ox3	1978	1997	+	17.6538	3.63e-07	0.0012	aaaaaaaaaaaaaaaaaaaa
Cucsa.277740	AP2	CsGA20ox3	1979	1998	+	17.6538	3.63e-07	0.0012	aaaaaaaaaaaaaaaaaaaa
Cucsa.277740	AP2	CsDMR2	1969	1988	-	17.6538	3.63e-07	0.0012	TAGAAAAAAGGAAAAAGAAA
Cucsa.195180	MYB	CsGA2ox2	200	209	-	15.75	3.63e-07	0.129	AGGTAGGTGG
Cucsa.322110	bZIP	CsD4H6	1340	1354	-	18.9375	3.63e-07	0.0407	GAGTACCACGTGGCA
Cucsa.362960	MIKC_MADS	CsDOXB1.1	898	918	+	17.2899	3.64e-07	0.00108	tctttttttttttttttttgt
Cucsa.362960	MIKC_MADS	CsD4H4	893	913	-	17.2899	3.64e-07	0.00108	TTTCCCTTTTTCCTTTTCTTC
Cucsa.362960	MIKC_MADS	CsGA7ox2	1602	1622	-	17.2899	3.64e-07	0.00108	CCCTTTTCTTTTTTTCTTTTT
Cucsa.362960	MIKC_MADS	CsDMR2	1957	1977	+	17.2899	3.64e-07	0.00108	cccttttctttttttcttttt
Cucsa.160530	GATA	CsDOXC23.1	77	91	-	18.5781	3.67e-07	0.13	TCTCAGCCGTACGTT
Cucsa.213830	Dof	CsACO3	1955	1975	-	16.8906	3.68e-07	0.00253	TTTTCTTTTCCTTTTTTTGTG
Cucsa.280310	GRAS	CsGA3ox1	644	663	-	17.1449	3.7e-07	0.00921	GAGAGAGAGAGAGAGAGAGT
Cucsa.280310	GRAS	CsGA2ox1	1683	1702	-	17.1449	3.7e-07	0.00921	GAGAGAGAGAGAGAGAGAGT
Cucsa.242740	C3H	CsDMR5	56	69	-	14.2031	3.71e-07	0.0423	AAGCAAAAAGGAGA
Cucsa.277740	AP2	CsD4H4	890	909	+	17.6282	3.74e-07	0.00122	aaagaagaaaaggaaaaagg
Cucsa.104010	MIKC_MADS	CsD4H4	1223	1237	+	18.2812	3.74e-07	0.125	aatttccatttttgg
Cucsa.136780	ERF	CsGA2ox5	1229	1249	-	17.6029	3.75e-07	0.0362	GAAGACGCGGCCGACGGTGGG
Cucsa.102120	Dof	CsDOXC55.4	712	740	-	17.0938	3.76e-07	0.00311	TTCTTTTTCTTTTTTTCCTTTTGTTATTT
Cucsa.194390	GATA	CsGA7ox1	203	217	+	18.1618	3.78e-07	0.0219	atgatgaggatgatg
Cucsa.102560	ERF	CsDOXA6.4	191	205	+	18.4062	3.78e-07	0.134	cccgcaccaccgtcc
Cucsa.362960	MIKC_MADS	CsDOXB1.2	308	328	-	17.2609	3.78e-07	0.00111	TTTCTCTCTTCTTCTTTCCCT
Cucsa.215290	TCP	CsGA2ox3	1392	1404	-	18.6986	3.82e-07	0.0675	GTGGGGCCCAGTG
Cucsa.213830	Dof	CsJOX1	125	145	-	16.8594	3.82e-07	0.00258	TTATCTTTTCCCTTTTCTTTT
Cucsa.378700	HD-ZIP	CsDOXC21.4	507	519	-	17.2769	3.82e-07	0.0804	CTCAATTATTGAT
Cucsa.166230	TCP	CsGA2ox3	1345	1355	-	18.6719	3.86e-07	0.0273	GTGGGGTCCAC
Cucsa.146980	MYB	CsDOXA6.2	109	119	+	16.4219	3.86e-07	0.137	caaccgttacg
Cucsa.280310	GRAS	CsGA3ox1	538	557	+	17.1014	3.88e-07	0.00921	aaggaaaagagagagagagg
Cucsa.102120	Dof	CsDOXC20.3	1953	1981	-	17.0625	3.9e-07	0.00311	TTTTTCCTTCTAATTCCTTTTTCTTTTTT
Cucsa.277740	AP2	CsACO5	1387	1406	+	17.5897	3.9e-07	0.00126	aaaaaagaaaggaaaaaaga
Cucsa.307870	C2H2	CsDMR2	208	226	-	17.7288	3.9e-07	0.00582	CTTCTCCCTCCATCTTCTC
Cucsa.353140	TALE	CsGA2ox1	1746	1765	+	18.28	3.91e-07	0.00401	ctctctccctctccctcctt
Cucsa.042770	ERF	CsDOXA6.4	185	205	+	17.8906	3.95e-07	0.0175	ccagcccccgcaccaccgtcc
Cucsa.102120	Dof	CsGA2ox1	1267	1295	-	17.0469	3.97e-07	0.00311	TTTCTTCTTTTCTTTTCTTTTTTTTTTAC
Cucsa.213830	Dof	CsGA2ox1	1273	1293	-	16.8281	3.97e-07	0.00262	TCTTCTTTTCTTTTCTTTTTT
Cucsa.251110	TCP	CsGA2ox3	1395	1404	+	18	3.98e-07	0.0705	tgggccccac
Cucsa.042770	ERF	CsDOXC45.1	997	1017	+	17.875	3.99e-07	0.0175	ctgataccgccaccaccacca
Cucsa.277740	AP2	CsGA2ox3	833	852	+	17.5641	4e-07	0.00126	agaaaagaaaaagaaaaaga
Cucsa.277740	AP2	CsGA3ox2	872	891	+	17.5641	4e-07	0.00126	aagaaagaagaaaaaaaaag
Cucsa.277740	AP2	CsGA2ox1	1821	1840	+	17.5641	4e-07	0.00126	agaaaagaaaaagaaaaaga
Cucsa.046660	ERF	CsDOXC55.2	1091	1107	-	17.7344	4e-07	0.029	GAGGCGGCTGAGCGGAG
Cucsa.280310	GRAS	CsDOXB3.4	1942	1961	-	17.0725	4.01e-07	0.00921	GAGGGAGAGAGAGAGAGAGA
Cucsa.102120	Dof	CsJOX2	138	166	-	17.0312	4.04e-07	0.00311	TTTTCTTTATATCTTACTTTTTCCACTTT
Cucsa.241090	bZIP	CsD4H6	1338	1355	-	18.75	4.05e-07	0.0495	AGAGTACCACGTGGCACA
Cucsa.159750	BBR-BPC	CsDOXC52.2	1781	1801	+	13.1507	4.08e-07	0.00175	ttactattctctctctctctt
Cucsa.046660	ERF	CsDOXC55.2	1168	1184	+	17.6875	4.1e-07	0.029	gcggcggcgcaatcaaa
Cucsa.271720	ERF	CsDOXC55.2	1163	1181	+	17.9219	4.1e-07	0.0327	cagcggcggcggcgcaatc
Cucsa.396070	bZIP	CsDOXC23.2	124	141	-	18.7188	4.11e-07	0.0662	TCAAAAGCCACGTGACCA
Cucsa.277740	AP2	CsGA2ox3	841	860	+	17.5385	4.12e-07	0.00128	aaaagaaaaagaaaaagaag
Cucsa.196600	LBD	CsDOXA6.1	1509	1529	-	17.2812	4.12e-07	0.029	ACCTTCATCGCCGCCGCTGGT
Cucsa.136780	ERF	CsDOXA6.1	1512	1532	+	17.4412	4.12e-07	0.0362	agcggcggcgatgaaggtcgc
Cucsa.362960	MIKC_MADS	CsGA2ox3	1047	1067	+	17.1884	4.16e-07	0.00119	cttttcttttcttttcttttt
Cucsa.307870	C2H2	CsGA2ox5	488	506	+	17.6271	4.17e-07	0.00596	ccccctcttccctctactc
Cucsa.277740	AP2	CsGA3ox4	728	747	-	17.5256	4.17e-07	0.00128	AAAAAAGAAAGAAAAAAAAG
Cucsa.277740	AP2	CsD4H6	1257	1276	-	17.5256	4.17e-07	0.00128	AAAAAAAAAAATGAAAGAAA
Cucsa.341290	Dof	CsDOXB3.3	1904	1924	-	15.8125	4.21e-07	0.0142	GGAAGGAAAAAGGAAAAATAA
Cucsa.159750	BBR-BPC	CsDOXC52.2	1783	1803	+	13.0685	4.22e-07	0.00179	actattctctctctctctttt
Cucsa.104340	MYB	CsDOXC20.5	416	436	+	16.875	4.23e-07	0.0739	gagcttatgtttggtggacca
Cucsa.277740	AP2	CsGA3ox1	1400	1419	+	17.5128	4.24e-07	0.00128	gaagaagaataagagagagg
Cucsa.362960	MIKC_MADS	CsD4H4	1345	1365	+	17.1739	4.24e-07	0.00119	ctctttttttttcttcttttt
Cucsa.012850	ERF	CsDOXC55.2	1154	1174	-	17.0588	4.27e-07	0.0188	CCGCCGCCGCTGTGGGCTGGT
Cucsa.359570	GATA	CsGA7ox1	165	179	-	16.625	4.28e-07	0.028	TGATCGTCATCATCA
Cucsa.341290	Dof	CsDOXA6.3	766	786	-	15.7969	4.31e-07	0.0142	AAAAAGAAAAAGCTAAATGAA
Cucsa.159750	BBR-BPC	CsDOXC52.2	1787	1807	+	13.0137	4.31e-07	0.0018	ttctctctctctcttttcata
Cucsa.088640	ERF	CsDOXC55.2	1161	1175	+	18.125	4.32e-07	0.0381	cacagcggcggcggc
Cucsa.362960	MIKC_MADS	CsDOXC45.1	246	266	-	17.1594	4.32e-07	0.00119	TTTTTTCTTTTCTTTTCTTCT
Cucsa.362960	MIKC_MADS	CsGA2ox3	843	863	-	17.1594	4.32e-07	0.00119	TTTCTTCTTTTTCTTTTTCTT
Cucsa.362960	MIKC_MADS	CsD4H4	1040	1060	-	17.1594	4.32e-07	0.00119	TCTTCCTTTCTTCTTCTTCTT
Cucsa.362960	MIKC_MADS	CsGA2ox1	1753	1773	+	17.1594	4.32e-07	0.00119	cctctccctccttttctctct
Cucsa.362960	MIKC_MADS	CsJOX1	1930	1950	-	17.1594	4.32e-07	0.00119	TTTTTTTTTTTTTTTTTCTGT
Cucsa.280310	GRAS	CsDOXC55.2	8	27	-	17	4.34e-07	0.00933	AAGAAAAAAACAAAGGAAAA
Cucsa.241090	bZIP	CsDOXC23.2	121	138	+	18.6406	4.38e-07	0.0495	tgttggtcacgtggcttt
Cucsa.362960	MIKC_MADS	CsDOXC55.2	6	26	+	17.1449	4.4e-07	0.0012	ttttttcctttgtttttttct
Cucsa.362960	MIKC_MADS	CsGA20ox3	46	66	-	17.1449	4.4e-07	0.0012	TTTCTCTCTTACTCTCTCTCT
Cucsa.213830	Dof	CsD4H8	1479	1499	+	16.7344	4.45e-07	0.00288	tttccttttcttcttctttat
Cucsa.159750	BBR-BPC	CsGA3ox1	681	701	+	12.9315	4.45e-07	0.00184	ctatctctatctatctatcta
Cucsa.325250	CAMTA	CsACO4	1363	1380	-	17.5156	4.47e-07	0.0757	ACGCGTATGTTACGTGTC
Cucsa.101370	ERF	CsDOXC55.2	1161	1179	+	17.9688	4.48e-07	0.0389	cacagcggcggcggcgcaa
Cucsa.362960	MIKC_MADS	CsDOXB1.1	897	917	+	17.1304	4.48e-07	0.0012	ttctttttttttttttttttg
Cucsa.362960	MIKC_MADS	CsACO3	1957	1977	-	17.1304	4.48e-07	0.0012	TTTTTTCTTTTCCTTTTTTTG
Cucsa.159750	BBR-BPC	CsGA2ox5	1033	1053	+	12.9041	4.5e-07	0.00184	ctctttctctcacacactctc
Cucsa.101370	ERF	CsDOXA6.1	1503	1521	+	17.9531	4.52e-07	0.0389	cgcaccaccagcggcggcg
Cucsa.307870	C2H2	CsGA2ox1	1508	1526	+	17.5	4.52e-07	0.006	ctcccaccccccccccccc
Cucsa.241090	bZIP	CsDOXB3.4	1806	1823	+	18.5938	4.53e-07	0.0495	gcattctgacgtggcatt
Cucsa.277740	AP2	CsGA2ox3	839	858	+	17.4487	4.53e-07	0.00136	gaaaaagaaaaagaaaaaga
Cucsa.026600	BBR-BPC	CsGA20ox3	39	62	+	12.7656	4.54e-07	0.0014	ctcttagagagagagagtaagaga
Cucsa.307870	C2H2	CsF3H2	209	227	+	17.4915	4.55e-07	0.006	cttcctctccctgcccctc
Cucsa.334870	ERF	CsDOXC55.2	1166	1180	-	18.1094	4.55e-07	0.0402	ATTGCGCCGCCGCCG
Cucsa.238090	TCP	CsDOXC21.4	257	286	+	17.2405	4.55e-07	0.0319	ggtggggccccttgttcaagacttggattc
Cucsa.362960	MIKC_MADS	CsGA2ox1	1819	1839	-	17.1159	4.56e-07	0.00121	CTTTTTCTTTTTCTTTTCTCT
Cucsa.102120	Dof	CsDOXC3.2	694	722	+	16.9219	4.57e-07	0.00343	tattataattttttcactttttgttttta
Cucsa.159750	BBR-BPC	CsGA20ox3	51	71	-	12.8493	4.6e-07	0.00184	TTTTTTTTCTCTCTTACTCTC
Cucsa.277740	AP2	CsGA20ox1	363	382	+	17.4359	4.6e-07	0.00136	gagagagagagaaagaaaga
Cucsa.277740	AP2	CsGA2ox5	1111	1130	-	17.4359	4.6e-07	0.00136	GGGGAAAAAGAAAAGAAAGA
Cucsa.322110	bZIP	CsDOXC23.2	122	136	+	18.5938	4.6e-07	0.0407	gttggtcacgtggct
Cucsa.278220	MYB_related	CsDOXC20.2	785	798	-	15.1719	4.61e-07	0.145	ACCAAAATATCTAA
Cucsa.353140	TALE	CsGA2ox1	1682	1701	+	18.0533	4.61e-07	0.0046	cactctctctctctctctct
Cucsa.391680	C2H2	CsDOXC27.1	1886	1897	-	18.1918	4.61e-07	0.0529	GGAAACAGAGCA
Cucsa.213830	Dof	CsACO4	1399	1419	-	16.7031	4.62e-07	0.00293	TTTTCTTTTTTCCATTTTTTC
Cucsa.159750	BBR-BPC	CsGA2ox1	1890	1910	+	12.8356	4.62e-07	0.00184	ctctcacactctctttttctt
Cucsa.362960	MIKC_MADS	CsDOXC37.1	1865	1885	+	17.1014	4.65e-07	0.00123	tttctatttctctctctctca
Cucsa.102120	Dof	CsGA2ox5	1054	1082	+	16.9062	4.65e-07	0.00343	acactctattctttttctttttctttcat
Cucsa.098430	Dof	CsDOXC20.3	1951	1971	+	16	4.67e-07	0.00874	agaaaaaagaaaaaggaatta
Cucsa.098430	Dof	CsGA20ox2	1965	1985	+	16	4.67e-07	0.00874	ataaaaaggaaaaagaaaata
Cucsa.159750	BBR-BPC	CsGA3ox1	1136	1156	-	12.7945	4.7e-07	0.00184	CCCCCCCTCTCACTCTTCCTC
Cucsa.289120	bZIP	CsDOXB3.4	1809	1820	+	16.8298	4.71e-07	0.0936	ttctgacgtggc
Cucsa.159750	BBR-BPC	CsGA3ox1	677	697	+	12.7808	4.73e-07	0.00184	ctctctatctctatctatcta
Cucsa.277740	AP2	CsDOXB1.2	315	334	+	17.4103	4.73e-07	0.00138	gaagaagagagaaaaaaaaa
Cucsa.244290	ERF	CsDOXC55.2	1159	1173	+	18.2344	4.73e-07	0.0836	cccacagcggcggcg
Cucsa.336890	ERF	CsDOXA6.1	1512	1522	-	18.3906	4.73e-07	0.0419	TCGCCGCCGCT
Cucsa.341290	Dof	CsDOXA6.3	1885	1905	+	15.7344	4.76e-07	0.0142	aaagaaaaaaagaaaaaaaaa
Cucsa.159750	BBR-BPC	CsGA2ox5	1031	1051	+	12.7534	4.78e-07	0.00184	ccctctttctctcacacactc
Cucsa.203800	Trihelix	CsJOX2	1376	1392	-	17.4118	4.78e-07	0.103	AGCACGTGTAAAACATT
Cucsa.307870	C2H2	CsACO3	1151	1169	-	17.4068	4.8e-07	0.00608	TCCCCCCCCCCCCCCCCCC
Cucsa.234310	MYB	CsF6H1	1950	1964	+	15.0625	4.85e-07	0.104	caattgtttggtggg
Cucsa.194390	GATA	CsGA7ox1	191	205	+	17.8676	4.87e-07	0.0219	atgatgctggtgatg
Cucsa.194390	GATA	CsDMR6	584	598	-	17.8676	4.87e-07	0.0219	ATGATGCTGGTGATG
Cucsa.349220	Trihelix	CsF6H1	988	1005	+	15.3824	4.87e-07	0.172	tggccaaacgacccttaa
Cucsa.175390	Dof	CsDOXA6.5	1603	1617	+	15.375	4.88e-07	0.0415	cttttttactttttt
Cucsa.310360	ERF	CsF3H2	248	268	+	15.5147	4.88e-07	0.0215	gctaccacctccacctatgcc
Cucsa.026600	BBR-BPC	CsGA20ox1	365	388	+	12.5938	4.88e-07	0.00147	gagagagagaaagaaagattaaat
Cucsa.026600	BBR-BPC	CsGA3ox1	538	561	+	12.5938	4.88e-07	0.00147	aaggaaaagagagagagaggatac
Cucsa.112810	Dof	CsGA7ox2	1608	1626	+	16.3906	4.88e-07	0.0317	aaaaaaagaaaagggaaaa
Cucsa.098430	Dof	CsDOXC45.1	253	273	+	15.9688	4.88e-07	0.00874	aagaaaagaaaaaagtaaact
Cucsa.098430	Dof	CsGA2ox5	1115	1135	-	15.9688	4.88e-07	0.00874	GGAGAGGGGAAAAAGAAAAGA
Cucsa.362960	MIKC_MADS	CsDOXB1.3	1501	1521	-	17.058	4.91e-07	0.00128	CTTTTTTTTGTTTTTTTTTTT
Cucsa.365320	ERF	CsDMR1	322	336	-	17.7656	4.92e-07	0.0348	CCGTCGCCACCACCA
Cucsa.365320	ERF	CsDMR1	376	390	-	17.7656	4.92e-07	0.0348	CCGTCGCCACCACCA
Cucsa.252730	GATA	CsGA7ox1	175	193	-	16.942	4.92e-07	0.017	CATTGTCATCATCTTGATC
Cucsa.026600	BBR-BPC	CsGA2ox1	842	865	-	12.5625	4.95e-07	0.00147	TGAAGAAAGAGAAATAGAGAGTGA
Cucsa.026600	BBR-BPC	CsGA2ox1	1753	1776	-	12.5625	4.95e-07	0.00147	ATAAGAGAGAAAAGGAGGGAGAGG
Cucsa.194390	GATA	CsDOXC45.1	1001	1015	-	17.8382	4.96e-07	0.0219	GTGGTGGTGGCGGTA
Cucsa.307870	C2H2	CsGA3ox1	1139	1157	-	17.3559	4.96e-07	0.00608	CCCCCCCCTCTCACTCTTC
Cucsa.213830	Dof	CsDOXC27.1	721	741	+	16.6406	4.98e-07	0.0031	cttacttttttttttctctac
Cucsa.051050	MYB	CsGA7ox2	863	877	+	16.9219	4.99e-07	0.0877	ttcacctaccacttc
Cucsa.113040	bHLH	CsACO4	1253	1267	+	18.2329	4.99e-07	0.176	gacattgccacgtgc
Cucsa.280310	GRAS	CsDOXB1.2	313	332	+	16.8696	4.99e-07	0.0101	aagaagaagagagaaaaaaa
Cucsa.362960	MIKC_MADS	CsDMR5	1232	1252	-	17.0435	5e-07	0.00129	TTTCTTTCTTTCTTTCTTTAT
Cucsa.378700	HD-ZIP	CsGA2ox1	218	230	-	17.0308	5.03e-07	0.0804	ATCAATTATTGGT
Cucsa.087530	G2-like	CsLBO1	1094	1103	+	15.2735	5.03e-07	0.174	gagaatctgg
Cucsa.195660	ERF	CsDOXC55.2	1166	1173	-	17.2872	5.08e-07	0.0601	CGCCGCCG
Cucsa.195660	ERF	CsDOXC55.2	1169	1176	-	17.2872	5.08e-07	0.0601	CGCCGCCG
Cucsa.195660	ERF	CsDOXA6.1	1514	1521	-	17.2872	5.08e-07	0.0601	CGCCGCCG
Cucsa.126860	ERF	CsDOXC55.2	1166	1173	-	19.1827	5.08e-07	0.0601	CGCCGCCG
Cucsa.126860	ERF	CsDOXC55.2	1169	1176	-	19.1827	5.08e-07	0.0601	CGCCGCCG
Cucsa.126860	ERF	CsDOXA6.1	1514	1521	-	19.1827	5.08e-07	0.0601	CGCCGCCG
Cucsa.107190	ERF	CsDOXC55.2	1167	1174	-	18.8511	5.08e-07	0.18	CCGCCGCC
Cucsa.069280	ERF	CsDOXC55.2	1170	1177	-	18.1635	5.08e-07	0.18	GCGCCGCC
Cucsa.362960	MIKC_MADS	CsDOXC45.1	809	829	-	17.029	5.1e-07	0.00129	TCTCCTCTTCTTCTTTTCTTT
Cucsa.362960	MIKC_MADS	CsD4H4	888	908	-	17.029	5.1e-07	0.00129	CTTTTTCCTTTTCTTCTTTTT
Cucsa.362960	MIKC_MADS	CsGA2ox1	1743	1763	+	17.029	5.1e-07	0.00129	tctctctctccctctccctcc
Cucsa.159750	BBR-BPC	CsDOXC37.2	710	730	+	12.5753	5.13e-07	0.00195	ctttatttctctctccccttc
Cucsa.255340	ERF	CsDOXA6.1	1114	1141	+	17.6719	5.15e-07	0.0362	ggaaagcagctgccgccaaagccgccac
Cucsa.213830	Dof	CsGA2ox5	1319	1339	+	16.6094	5.17e-07	0.0031	ctttctttttctttttatcct
Cucsa.213830	Dof	CsDOXA6.3	1880	1900	-	16.6094	5.17e-07	0.0031	TTTTCTTTTTTTCTTTTATTA
Cucsa.164580	MYB	CsGA7ox1	199	213	-	16.0781	5.18e-07	0.179	ATCCTCATCATCACC
Cucsa.307870	C2H2	CsGA2ox1	1747	1765	+	17.2881	5.18e-07	0.00613	tctctccctctccctcctt
Cucsa.104200	HD-ZIP	CsDOXC20.5	1885	1895	+	13.3433	5.18e-07	0.168	caatcattcac
Cucsa.362960	MIKC_MADS	CsDMR5	1228	1248	-	17.0145	5.19e-07	0.00131	TTTCTTTCTTTCTTTATTTTT
Cucsa.277740	AP2	CsGA20ox3	45	64	+	17.3205	5.19e-07	0.00149	gagagagagagtaagagaga
Cucsa.277740	AP2	CsDOXA6.3	1885	1904	+	17.3205	5.19e-07	0.00149	aaagaaaaaaagaaaaaaaa
Cucsa.158340	MYB	CsJOX2	355	369	+	17.1719	5.24e-07	0.0367	ccatcaaccacccac
Cucsa.118450	MYB	CsDMR1	332	352	-	17.8281	5.25e-07	0.0604	AACCTTCTCCACCAACCCGTC
Cucsa.102120	Dof	CsDOXC55.2	9	37	+	16.7969	5.26e-07	0.00379	tttcctttgtttttttctttttgaccatg
Cucsa.159750	BBR-BPC	CsDMR5	1253	1273	-	12.5068	5.26e-07	0.00198	ATTTCTTTCTTTCTTTCTTTC
Cucsa.277740	AP2	CsF6H1	1397	1416	-	17.3077	5.27e-07	0.0015	GAAAAAGAAAAAGAAACAAA
Cucsa.026600	BBR-BPC	CsGA2ox1	1499	1522	-	12.4062	5.28e-07	0.00155	GGGGGGGGGTGGGAGAGAGTGATA
Cucsa.289120	bZIP	CsDOXC23.2	124	135	+	16.7447	5.29e-07	0.0936	tggtcacgtggc
Cucsa.104970	bZIP	CsD4H6	1340	1349	-	15.5319	5.29e-07	0.0937	CCACGTGGCA
Cucsa.277740	AP2	CsGA3ox1	532	551	+	17.2949	5.34e-07	0.0015	tataagaaggaaaagagaga
Cucsa.277740	AP2	CsGA2ox3	829	848	+	17.2949	5.34e-07	0.0015	gaaaagaaaagaaaaagaaa
Cucsa.042770	ERF	CsDOXC55.2	1166	1186	-	17.4219	5.35e-07	0.0209	TATTTGATTGCGCCGCCGCCG
Cucsa.213830	Dof	CsGA20ox3	1458	1478	-	16.5781	5.37e-07	0.00316	CTTACTTTTCTTTTTATTTTT
Cucsa.362960	MIKC_MADS	CsGA3ox1	650	670	+	16.9855	5.38e-07	0.00131	tctctctctctctctctatct
Cucsa.362960	MIKC_MADS	CsGA2ox1	1691	1711	+	16.9855	5.38e-07	0.00131	tctctctctctctctctatct
Cucsa.362960	MIKC_MADS	CsGA3ox2	867	887	-	16.9855	5.38e-07	0.00131	TTTTTTCTTCTTTCTTCTCTT
Cucsa.362960	MIKC_MADS	CsDOXC55.1	1142	1162	-	16.9855	5.38e-07	0.00131	TTTCTCTCTTTTTTTTCTTCC
Cucsa.362960	MIKC_MADS	CsDOXB1.2	1759	1779	-	16.9855	5.38e-07	0.00131	TTTCTTTTTTCTTTTTTTCCT
Cucsa.090320	bHLH	CsDOXC23.2	127	136	-	17.6094	5.39e-07	0.0955	AGCCACGTGA
Cucsa.090320	bHLH	CsDOXC23.1	1008	1017	+	17.6094	5.39e-07	0.0955	agccacgtga
Cucsa.159750	BBR-BPC	CsGA3ox1	1134	1154	-	12.4247	5.44e-07	0.00202	CCCCCTCTCACTCTTCCTCTC
Cucsa.271720	ERF	CsDOXA6.1	1505	1523	+	17.4688	5.45e-07	0.0327	caccaccagcggcggcgat
Cucsa.026600	BBR-BPC	CsGA2ox5	1111	1134	-	12.3281	5.45e-07	0.00159	GAGAGGGGAAAAAGAAAAGAAAGA
Cucsa.280310	GRAS	CsGA20ox3	53	72	+	16.7826	5.48e-07	0.0105	gagtaagagagaaaaaaaaa
Cucsa.277740	AP2	CsGA20ox3	1884	1903	-	17.2692	5.48e-07	0.00152	AAAAGAGAAAAAGAGAAAAG
Cucsa.359880	ERF	CsDOXA6.1	1129	1149	-	17.5469	5.5e-07	0.0388	CTGTCGCTGTGGCGGCTTTGG
Cucsa.101370	ERF	CsDOXC55.2	1155	1173	+	17.6406	5.52e-07	0.0389	ccagcccacagcggcggcg
Cucsa.277740	AP2	CsACO1	1722	1741	+	17.2564	5.56e-07	0.00153	agaaaaaaaaaaaaaaaaga
Cucsa.271720	ERF	CsDOXC21.4	1313	1331	+	17.4375	5.56e-07	0.0327	ggggagcgaaggcggagaa
Cucsa.362960	MIKC_MADS	CsJOX1	1928	1948	-	16.9565	5.57e-07	0.00134	TTTTTTTTTTTTTTTCTGTTT
Cucsa.364380	bZIP	CsD4H6	1340	1354	-	18.3125	5.61e-07	0.0992	GAGTACCACGTGGCA
Cucsa.241090	bZIP	CsDOXC23.1	1006	1023	-	18.2656	5.61e-07	0.0495	ATGTGATCACGTGGCTCT
Cucsa.396070	bZIP	CsD4H6	1335	1352	+	18.2812	5.63e-07	0.0662	aaatgtgccacgtggtac
Cucsa.005360	bHLH	CsD4H6	1336	1356	+	17.6406	5.63e-07	0.199	aatgtgccacgtggtactctt
Cucsa.102120	Dof	CsDOXA6.5	1568	1596	+	16.7344	5.64e-07	0.00387	aaattctttcttttacctttttagtcttt
Cucsa.102120	Dof	CsACO5	1862	1890	+	16.7344	5.64e-07	0.00387	tatcttatctttttttcttttcttttcat
Cucsa.352470	ERF	CsDOXA6.1	1514	1528	-	17.9062	5.68e-07	0.0338	CCTTCATCGCCGCCG
Cucsa.161430	MYB	CsDOXC13.1	1371	1385	-	16.5	5.7e-07	0.101	AATTATAGCCGTTGG
Cucsa.277740	AP2	CsD4H4	1349	1368	-	17.2308	5.7e-07	0.00156	AATAAAAAGAAGAAAAAAAA
Cucsa.352470	ERF	CsDMR1	322	336	-	17.8906	5.74e-07	0.0338	CCGTCGCCACCACCA
Cucsa.352470	ERF	CsDMR1	376	390	-	17.8906	5.74e-07	0.0338	CCGTCGCCACCACCA
Cucsa.341290	Dof	CsD4H4	890	910	+	15.6094	5.76e-07	0.0142	aaagaagaaaaggaaaaaggg
Cucsa.362960	MIKC_MADS	CsACO3	1819	1839	+	16.9275	5.78e-07	0.00138	ttttgtttttttttttttctt
Cucsa.012850	ERF	CsF3H2	249	269	+	16.4853	5.81e-07	0.0209	ctaccacctccacctatgccc
Cucsa.143260	bHLH	CsDMR6	1769	1782	-	16.875	5.82e-07	0.103	TTTGCAACTTGCCT
Cucsa.136780	ERF	CsDOXC55.2	1155	1175	+	16.8382	5.83e-07	0.0411	ccagcccacagcggcggcggc
Cucsa.102120	Dof	CsDOXC45.1	805	833	-	16.7031	5.83e-07	0.00387	AATTTCTCCTCTTCTTCTTTTCTTTTTCT
Cucsa.102120	Dof	CsGA20ox1	1580	1608	-	16.7031	5.83e-07	0.00387	ACCCTCTCTTGTTTTACTTTTTGATTTAT
Cucsa.196600	LBD	CsDOXC55.2	1155	1175	-	16.6719	5.85e-07	0.0343	GCCGCCGCCGCTGTGGGCTGG
Cucsa.026600	BBR-BPC	CsD4H6	1243	1266	-	12.1562	5.86e-07	0.00169	ATGAAAGAAAGAGAAGGTGGAAGA
Cucsa.098430	Dof	CsDOXC3.2	183	203	+	15.8438	5.87e-07	0.00874	aaaaaaaagaaaaagggatat
Cucsa.277740	AP2	CsACO5	1865	1884	-	17.1923	5.93e-07	0.00161	AGAAAAGAAAAAAAGATAAG
Cucsa.112760	MYB	CsGA2ox1	521	539	+	17.3125	5.94e-07	0.0453	ttggtggtgggtggaaaaa
Cucsa.203800	Trihelix	CsD4H6	1334	1350	-	17.25	5.95e-07	0.103	ACCACGTGGCACATTTT
Cucsa.012850	ERF	CsDOXC45.1	997	1017	+	16.4412	5.95e-07	0.0209	ctgataccgccaccaccacca
Cucsa.095860	ERF	CsDOXA6.1	1514	1528	+	17.5312	5.96e-07	0.0527	cggcggcgatgaagg
Cucsa.098430	Dof	CsACO1	1364	1384	-	15.8281	6e-07	0.00874	AAAAGGAGAAAAAAGAAAAAA
Cucsa.159750	BBR-BPC	CsDOXC37.1	1864	1884	+	12.1644	6.02e-07	0.00222	atttctatttctctctctctc
Cucsa.362960	MIKC_MADS	CsDOXC27.1	66	86	-	16.8841	6.09e-07	0.00145	TTTTTTTTTTTTTTTTTTTGC
Cucsa.353140	TALE	CsGA20ox1	873	892	-	17.6533	6.12e-07	0.00594	TGCTCTCCCTCTCTTTCCCC
Cucsa.098430	Dof	CsDOXA6.5	1578	1598	-	15.8125	6.14e-07	0.00874	GAAAAGACTAAAAAGGTAAAA
Cucsa.102120	Dof	CsGA7ox2	1595	1623	-	16.6562	6.14e-07	0.00397	TCCCTTTTCTTTTTTTCTTTTTTAACAAA
Cucsa.166230	TCP	CsDOXC23.1	1369	1379	+	18.125	6.15e-07	0.0316	gtgggatccac
Cucsa.277740	AP2	CsDOXC3.2	1362	1381	-	17.1538	6.16e-07	0.00165	GCAGAAGAAGAAGAGAGAGA
Cucsa.277740	AP2	CsDOXC3.1	63	82	-	17.141	6.24e-07	0.00165	AAAAAATAGAGAAAAAGAAA
Cucsa.277740	AP2	CsACO4	1399	1418	+	17.141	6.24e-07	0.00165	gaaaaaatggaaaaaagaaa
Cucsa.166230	TCP	CsDOXC21.4	258	268	+	18.1094	6.25e-07	0.0316	gtggggcccct
Cucsa.118450	MYB	CsDMR1	369	389	-	17.6094	6.25e-07	0.0604	CGTCGCCACCACCAATCCCCT
Cucsa.307870	C2H2	CsGA2ox1	1512	1530	+	16.9915	6.26e-07	0.00703	caccccccccccccccccc
Cucsa.026600	BBR-BPC	CsGA20ox1	870	893	+	11.9844	6.29e-07	0.0018	ttgggggaaagagagggagagcag
Cucsa.213110	Trihelix	CsDOXB3.2	146	160	-	17.75	6.29e-07	0.222	TCATTTCCGGCGAGA
Cucsa.026600	BBR-BPC	CsDOXC37.1	1790	1813	-	11.9688	6.33e-07	0.0018	GAGAGATATATATAGAGAAAAAGA
Cucsa.341290	Dof	CsDOXC55.1	996	1016	-	15.5469	6.33e-07	0.0142	AAAAAGGAAAAGAAAAGAAAA
Cucsa.311060	WRKY	CsDOXC55.1	1493	1506	-	17.5938	6.34e-07	0.224	AGGGTTGACTTTTC
Cucsa.307870	C2H2	CsACO4	1791	1809	+	16.9661	6.36e-07	0.00703	tctcttcttcttcttcttc
Cucsa.102120	Dof	CsD4H4	1344	1372	+	16.625	6.36e-07	0.00397	actctttttttttcttctttttattataa
Cucsa.102120	Dof	CsGA3ox1	1388	1416	-	16.625	6.36e-07	0.00397	CTCTCTTATTCTTCTTCTTTTGCTTTCGT
Cucsa.197650	TCP	CsGA2ox3	1394	1413	-	11.3372	6.39e-07	0.0376	TTAAAAAATGTGGGGCCCAG
Cucsa.277740	AP2	CsDOXC45.1	812	831	+	17.1154	6.4e-07	0.00168	gaaaagaagaagaggagaaa
Cucsa.112810	Dof	CsDOXA6.1	304	322	+	16.1875	6.42e-07	0.0317	aaaaaggaaaaagttcaca
Cucsa.098430	Dof	CsDOXA6.2	1739	1759	+	15.7812	6.42e-07	0.00874	aaaaaaaccaaaaaggaacat
Cucsa.098430	Dof	CsD4H8	1477	1497	-	15.7812	6.42e-07	0.00874	AAAGAAGAAGAAAAGGAAAAA
Cucsa.362960	MIKC_MADS	CsDOXC55.3	251	271	+	16.8406	6.42e-07	0.00152	cttttttttttttttttttgg
Cucsa.112760	MYB	CsDOXA6.4	218	236	-	17.2344	6.43e-07	0.0453	TGAAAGGTGGGTGGAGTTG
Cucsa.321150	ERF	CsDOXC55.2	1092	1112	+	16.2188	6.43e-07	0.0378	tccgctcagccgcctctctcc
Cucsa.325250	CAMTA	CsDOXC3.2	654	671	-	17.125	6.44e-07	0.0757	ACCCGGGTCACCCGCGTG
Cucsa.342790	MIKC_MADS	CsD4H6	94	108	-	16.8235	6.51e-07	0.11	CTCCCAAAGGGGCAA
Cucsa.258940	bZIP	CsD4H6	1340	1354	+	17.9062	6.52e-07	0.0577	tgccacgtggtactc
Cucsa.098430	Dof	CsF3H2	1138	1158	+	15.7656	6.57e-07	0.00874	aaaaaaaaaaaaaagtaacga
Cucsa.098430	Dof	CsGA7ox2	1606	1626	+	15.7656	6.57e-07	0.00874	agaaaaaaagaaaagggaaaa
Cucsa.277740	AP2	CsDOXC55.3	243	262	-	17.0897	6.58e-07	0.00171	AAAAAAAAAAAGAATAGAAA
Cucsa.100440	WRKY	CsDOXC21.4	132	142	-	18.0698	6.63e-07	0.235	TTGACCCAGCC
Cucsa.362960	MIKC_MADS	CsGA2ox5	1109	1129	+	16.8116	6.65e-07	0.00152	tctctttcttttctttttccc
Cucsa.362960	MIKC_MADS	CsDOXC55.4	719	739	-	16.8116	6.65e-07	0.00152	TCTTTTTCTTTTTTTCCTTTT
Cucsa.362960	MIKC_MADS	CsDOXB1.2	1760	1780	-	16.8116	6.65e-07	0.00152	GTTTCTTTTTTCTTTTTTTCC
Cucsa.277740	AP2	CsGA7ox2	664	683	-	17.0769	6.66e-07	0.00172	AAGACAGTAAAAGAAAGAAA
Cucsa.242910	bHLH	CsDMR4	1883	1893	+	16.9589	6.67e-07	0.13	agcaacttgcc
Cucsa.307870	C2H2	CsGA2ox1	1744	1762	+	16.8898	6.67e-07	0.00714	ctctctctccctctccctc
Cucsa.102120	Dof	CsD4H4	890	918	-	16.5781	6.69e-07	0.00411	TAACCTTTCCCTTTTTCCTTTTCTTCTTT
Cucsa.159750	BBR-BPC	CsGA2ox1	1750	1770	+	11.8904	6.7e-07	0.00244	ctccctctccctccttttctc
Cucsa.129320	ERF	CsDOXC45.1	1001	1015	-	17.2344	6.72e-07	0.0569	GTGGTGGTGGCGGTA
Cucsa.026600	BBR-BPC	CsDOXC37.1	1792	1815	-	11.8125	6.75e-07	0.0019	GAGAGAGATATATATAGAGAAAAA
Cucsa.252730	GATA	CsDOXC17.1	705	723	-	16.3623	6.75e-07	0.0211	TATCATGATGATCAACATC
Cucsa.362960	MIKC_MADS	CsACO4	1806	1826	+	16.7971	6.77e-07	0.00152	cttcttcttcttctgctcttt
Cucsa.362960	MIKC_MADS	CsGA3ox1	537	557	-	16.7971	6.77e-07	0.00152	CCTCTCTCTCTCTTTTCCTTC
Cucsa.353140	TALE	CsFLS1	815	834	-	17.5067	6.78e-07	0.00635	CCCCCTCTCTCCCTACCCGG
Cucsa.124410	ARF	CsDOXA6.1	1354	1374	-	12.025	6.82e-07	0.116	TTTTTGGTTTCTGTGAGAAAA
Cucsa.277740	AP2	CsDOXB3.3	145	164	+	17.0513	6.83e-07	0.00175	aaaaaagaaaaaaggaaaag
Cucsa.260400	NAC	CsDOXC20.1	477	495	-	17.1406	6.85e-07	0.242	CGTCTCTATCACGGTAACT
Cucsa.280310	GRAS	CsGA2ox7	1866	1885	-	16.5652	6.87e-07	0.0123	CAAAAGAGGACAGAAGAGGA
Cucsa.253400	ERF	CsDOXA6.1	1514	1528	-	17.4531	6.88e-07	0.0608	CCTTCATCGCCGCCG
Cucsa.362960	MIKC_MADS	CsGA3ox2	870	890	-	16.7826	6.88e-07	0.00152	TTTTTTTTTCTTCTTTCTTCT
Cucsa.353140	TALE	CsDOXC55.2	1093	1112	+	17.48	6.91e-07	0.00635	ccgctcagccgcctctctcc
Cucsa.201710	WRKY	CsDOXC55.1	1494	1506	-	17.8281	6.97e-07	0.244	AGGGTTGACTTTT
Cucsa.277740	AP2	CsGA7ox2	352	371	+	17.0256	7e-07	0.00178	gagacaaaagggaaaagaga
Cucsa.362960	MIKC_MADS	CsGA2ox3	831	851	-	16.7681	7e-07	0.00152	CTTTTTCTTTTTCTTTTCTTT
Cucsa.365320	ERF	CsDOXC45.1	1003	1017	+	17.1719	7.03e-07	0.0414	ccgccaccaccacca
Cucsa.102120	Dof	CsD4H6	1433	1461	+	16.5312	7.04e-07	0.00424	ttcattttttcttcttctttttatatttt
Cucsa.102530	bHLH	CsDOXC37.2	1654	1662	+	16.2979	7.05e-07	0.125	cccacgtgg
Cucsa.271720	ERF	CsLBO1	659	677	-	17.0312	7.11e-07	0.0338	TGTTGGTGGCGGTGGAAAA
Cucsa.362960	MIKC_MADS	CsDOXB1.2	302	322	-	16.7536	7.12e-07	0.00152	TCTTCTTCTTTCCCTTTCTTC
Cucsa.255340	ERF	CsDOXC55.2	1092	1119	+	17.0312	7.13e-07	0.0417	tccgctcagccgcctctctccgttaaga
Cucsa.213830	Dof	CsGA2ox1	1823	1843	-	16.3281	7.18e-07	0.00408	ATTTCTTTTTCTTTTTCTTTT
Cucsa.285250	HD-ZIP	CsGA2ox1	219	229	+	13.8971	7.19e-07	0.117	ccaataattga
Cucsa.285250	HD-ZIP	CsACO2	441	451	+	13.8971	7.19e-07	0.117	ccaataattga
Cucsa.159020	HD-ZIP	CsGA2ox1	219	229	+	15.1029	7.19e-07	0.116	ccaataattga
Cucsa.159020	HD-ZIP	CsACO2	441	451	+	15.1029	7.19e-07	0.116	ccaataattga
Cucsa.043520	WOX	CsJOX2	432	442	+	16.7595	7.19e-07	0.161	tcattcattca
Cucsa.112810	Dof	CsACO2	854	872	+	16.0938	7.2e-07	0.0317	agaaagaaaaaagggataa
Cucsa.061590	bHLH	CsDOXC23.2	156	166	+	17.5156	7.25e-07	0.136	tgcaagttgct
Cucsa.362960	MIKC_MADS	CsGA20ox4	1286	1306	+	16.7391	7.25e-07	0.00152	ctttgccctctctctcttcca
Cucsa.362960	MIKC_MADS	CsGA2ox3	826	846	-	16.7391	7.25e-07	0.00152	TCTTTTTCTTTTCTTTTCTTT
Cucsa.362960	MIKC_MADS	CsJOX1	1935	1955	-	16.7391	7.25e-07	0.00152	TTCTGTTTTTTTTTTTTTTTT
Cucsa.277740	AP2	CsGA3ox1	536	555	+	16.9872	7.27e-07	0.00184	agaaggaaaagagagagaga
Cucsa.102120	Dof	CsDOXC45.1	800	828	-	16.5	7.28e-07	0.0043	CTCCTCTTCTTCTTTTCTTTTTCTTTTGC
Cucsa.198920	MYB	CsACO2	911	925	-	15.625	7.3e-07	0.245	ATTTTCCTTATCCTC
Cucsa.213830	Dof	CsD4H1	120	140	-	16.3125	7.32e-07	0.00408	TTTTCTTTTCTTTTCTTTTAT
Cucsa.213830	Dof	CsGA7ox1	1233	1253	-	16.3125	7.32e-07	0.00408	CTCTCTTTTTATGTTTTTTTT
Cucsa.159750	BBR-BPC	CsDOXB1.3	959	979	-	11.6575	7.33e-07	0.00264	TACACTCTCTTTCTCCATCCC
Cucsa.026600	BBR-BPC	CsDOXC21.2	258	281	+	11.6094	7.33e-07	0.00205	aaggaagagagatggagagtggat
Cucsa.241090	bZIP	CsDOXC23.2	729	746	-	17.8438	7.34e-07	0.0518	GGTTGTCGACGTGGCAAA
Cucsa.012850	ERF	CsDOXA6.1	1129	1149	+	16.0147	7.44e-07	0.022	ccaaagccgccacagcgacag
Cucsa.277740	AP2	CsGA2ox3	1179	1198	-	16.9615	7.47e-07	0.00186	GAAAGAAAGAAAAAGAAAAA
Cucsa.277740	AP2	CsDMR5	1233	1252	+	16.9615	7.47e-07	0.00186	taaagaaagaaagaaagaaa
Cucsa.026600	BBR-BPC	CsGA20ox1	367	390	+	11.5625	7.47e-07	0.00207	gagagagaaagaaagattaaatta
Cucsa.112810	Dof	CsGA20ox3	1885	1903	-	16.0625	7.47e-07	0.0317	AAAAGAGAAAAAGAGAAAA
Cucsa.362960	MIKC_MADS	CsGA2ox3	1016	1036	+	16.7101	7.5e-07	0.00152	tcttttcttttcttttctttt
Cucsa.362960	MIKC_MADS	CsGA2ox3	1021	1041	+	16.7101	7.5e-07	0.00152	tcttttcttttcttttctttt
Cucsa.362960	MIKC_MADS	CsGA2ox3	1026	1046	+	16.7101	7.5e-07	0.00152	tcttttcttttcttttctttt
Cucsa.362960	MIKC_MADS	CsGA2ox3	1031	1051	+	16.7101	7.5e-07	0.00152	tcttttcttttcttttctttt
Cucsa.362960	MIKC_MADS	CsGA2ox3	1036	1056	+	16.7101	7.5e-07	0.00152	tcttttcttttcttttctttt
Cucsa.362960	MIKC_MADS	CsGA2ox3	1041	1061	+	16.7101	7.5e-07	0.00152	tcttttcttttcttttctttt
Cucsa.362960	MIKC_MADS	CsGA2ox3	1046	1066	+	16.7101	7.5e-07	0.00152	tcttttcttttcttttctttt
Cucsa.362960	MIKC_MADS	CsDOXA6.5	1097	1117	-	16.7101	7.5e-07	0.00152	TCTCTCTCTCTTTTTTCTCTT
Cucsa.362960	MIKC_MADS	CsDOXA6.3	1883	1903	-	16.7101	7.5e-07	0.00152	TTTTTTTCTTTTTTTCTTTTA
Cucsa.012850	ERF	CsDOXB6.1	1795	1815	-	16	7.5e-07	0.022	CCGTTGCCGCCACTTCATGCA
Cucsa.102120	Dof	CsDMR3	423	451	-	16.4688	7.53e-07	0.0043	AGCTTTCATTTTTTTTCTTTTTCCAGCTT
Cucsa.102120	Dof	CsGA2ox5	1322	1350	+	16.4688	7.53e-07	0.0043	tctttttctttttatcctttttaattttt
Cucsa.136780	ERF	CsF3H2	251	271	-	16.3824	7.55e-07	0.0443	TGGGGCATAGGTGGAGGTGGT
Cucsa.213830	Dof	CsDOXC3.1	100	120	+	16.2812	7.58e-07	0.00416	ctttctttttctgttttgtct
Cucsa.306580	MYB	CsDOXC52.2	215	229	+	17.5469	7.59e-07	0.0973	agaaaattaggtatg
Cucsa.341290	Dof	CsD4H4	882	902	+	15.4219	7.61e-07	0.0142	gaacacaaaaagaagaaaagg
Cucsa.280310	GRAS	CsGA2ox1	1681	1700	-	16.4638	7.62e-07	0.0123	GAGAGAGAGAGAGAGAGTGG
Cucsa.362960	MIKC_MADS	CsD4H4	894	914	-	16.6957	7.63e-07	0.00152	CTTTCCCTTTTTCCTTTTCTT
Cucsa.362960	MIKC_MADS	CsGA3ox1	1129	1149	-	16.6957	7.63e-07	0.00152	TCTCACTCTTCCTCTCTTCCT
Cucsa.175460	MYB	CsGA2ox3	293	307	-	16.75	7.63e-07	0.112	TAAATATAGCCGTTG
Cucsa.159750	BBR-BPC	CsGA2ox2	1815	1835	+	11.5479	7.64e-07	0.00272	cttttctcccctctctctctc
Cucsa.271720	ERF	CsDMR1	370	388	+	16.9062	7.66e-07	0.0338	ggggattggtggtggcgac
Cucsa.277740	AP2	CsACO4	1404	1423	+	16.9359	7.66e-07	0.00189	aatggaaaaaagaaaagaaa
Cucsa.088640	ERF	CsDMR1	323	337	+	17.2969	7.7e-07	0.0453	ggtggtggcgacggg
Cucsa.088640	ERF	CsDMR1	377	391	+	17.2969	7.7e-07	0.0453	ggtggtggcgacggg
Cucsa.026600	BBR-BPC	CsF3H2	202	225	-	11.4844	7.71e-07	0.0021	GGGGCAGGGAGAGGAAGAAAAGGC
Cucsa.026600	BBR-BPC	CsGA3ox1	1412	1435	+	11.4844	7.71e-07	0.0021	gagagaggtatagggagaagaggg
Cucsa.213830	Dof	CsDOXC55.1	991	1011	+	16.2656	7.72e-07	0.00416	ttttcttttcttttcttttcc
Cucsa.277740	AP2	CsD4H6	1438	1457	-	16.9231	7.75e-07	0.00189	TATAAAAAGAAGAAGAAAAA
Cucsa.277740	AP2	CsGA20ox3	1886	1905	-	16.9231	7.75e-07	0.00189	TTAAAAGAGAAAAAGAGAAA
Cucsa.362960	MIKC_MADS	CsGA2ox3	1017	1037	+	16.6812	7.76e-07	0.00152	cttttcttttcttttcttttc
Cucsa.362960	MIKC_MADS	CsGA2ox3	1022	1042	+	16.6812	7.76e-07	0.00152	cttttcttttcttttcttttc
Cucsa.362960	MIKC_MADS	CsGA2ox3	1027	1047	+	16.6812	7.76e-07	0.00152	cttttcttttcttttcttttc
Cucsa.362960	MIKC_MADS	CsGA2ox3	1032	1052	+	16.6812	7.76e-07	0.00152	cttttcttttcttttcttttc
Cucsa.362960	MIKC_MADS	CsGA2ox3	1037	1057	+	16.6812	7.76e-07	0.00152	cttttcttttcttttcttttc
Cucsa.362960	MIKC_MADS	CsGA2ox3	1042	1062	+	16.6812	7.76e-07	0.00152	cttttcttttcttttcttttc
Cucsa.362960	MIKC_MADS	CsJOX2	1880	1900	-	16.6812	7.76e-07	0.00152	TTTTTTTTTTTTTTTTTTTTA
Cucsa.362960	MIKC_MADS	CsGA20ox3	1977	1997	-	16.6812	7.76e-07	0.00152	TTTTTTTTTTTTTTTTTTTTA
Cucsa.231820	ERF	CsDOXC55.2	1166	1180	-	17.2656	7.77e-07	0.0333	ATTGCGCCGCCGCCG
Cucsa.006170	MYB	CsDOXC17.2	646	658	+	16.6582	7.77e-07	0.0991	atggttggtggag
Cucsa.234310	MYB	CsDOXC17.2	643	657	+	14.875	7.8e-07	0.104	attatggttggtgga
Cucsa.175390	Dof	CsJOX2	556	570	-	15.125	7.82e-07	0.0532	CCTTTTCACTTTTTT
Cucsa.280310	GRAS	CsGA3ox1	652	671	-	16.4348	7.85e-07	0.0123	GAGATAGAGAGAGAGAGAGA
Cucsa.280310	GRAS	CsGA2ox1	1693	1712	-	16.4348	7.85e-07	0.0123	GAGATAGAGAGAGAGAGAGA
Cucsa.118340	NAC	CsDOXC21.2	206	222	-	17.8481	7.89e-07	0.139	CACCGTTAGGACGCCGG
Cucsa.341290	Dof	CsJOX2	558	578	+	15.3906	7.96e-07	0.0142	aaaagtgaaaaggaaaaagaa
Cucsa.341290	Dof	CsDOXC45.1	801	821	+	15.3906	7.96e-07	0.0142	caaaagaaaaagaaaagaaga
Cucsa.252730	GATA	CsDOXC20.1	439	457	-	16.0435	8.01e-07	0.023	GATCATTTTGATCATCATT
Cucsa.098430	Dof	CsDOXC52.2	969	989	+	15.625	8.02e-07	0.00953	gatgaaagaaaaaagtgaaat
Cucsa.098430	Dof	CsDOXA6.3	769	789	-	15.625	8.02e-07	0.00953	ATAAAAAAGAAAAAGCTAAAT
Cucsa.098430	Dof	CsDOXB6.1	911	931	-	15.625	8.02e-07	0.00953	AAAAAAAAAAAAAAGCTGAAG
Cucsa.362960	MIKC_MADS	CsDOXB3.3	143	163	-	16.6522	8.02e-07	0.00155	TTTTCCTTTTTTCTTTTTTTG
Cucsa.362960	MIKC_MADS	CsGA2ox3	825	845	-	16.6522	8.02e-07	0.00155	CTTTTTCTTTTCTTTTCTTTT
Cucsa.277740	AP2	CsF6H1	1399	1418	-	16.8846	8.04e-07	0.00192	TGGAAAAAGAAAAAGAAACA
Cucsa.277740	AP2	CsACO1	1720	1739	+	16.8846	8.04e-07	0.00192	gaagaaaaaaaaaaaaaaaa
Cucsa.277740	AP2	CsACO3	1957	1976	+	16.8846	8.04e-07	0.00192	caaaaaaaggaaaagaaaaa
Cucsa.026600	BBR-BPC	CsGA3ox1	686	709	-	11.375	8.06e-07	0.00218	AGGGGAGATAGATAGATAGATAGA
Cucsa.307870	C2H2	CsDOXC21.2	1960	1978	+	16.5847	8.07e-07	0.00838	tatcttcttcttcttcctc
Cucsa.127480	ZF-HD	CsDOXC17.2	1637	1651	-	14.1176	8.11e-07	0.179	AATTGTAATTAGTGA
Cucsa.213830	Dof	CsGA20ox3	1880	1900	+	16.2188	8.14e-07	0.00432	ttggcttttctctttttctct
Cucsa.341290	Dof	CsD4H4	1010	1030	+	15.375	8.15e-07	0.0142	aaaaaagaaaagaaaaaagaa
Cucsa.362960	MIKC_MADS	CsGA2ox1	1269	1289	-	16.6377	8.16e-07	0.00157	CTTTTCTTTTCTTTTTTTTTT
Cucsa.277740	AP2	CsDOXC55.3	238	257	-	16.859	8.25e-07	0.00194	AAAAAAGAATAGAAAAGAAA
Cucsa.277740	AP2	CsGA7ox1	1237	1256	+	16.859	8.25e-07	0.00194	aaaacataaaaagagagaga
Cucsa.026600	BBR-BPC	CsGA3ox1	1122	1145	+	11.3125	8.27e-07	0.00222	ggaagagaggaagagaggaagagt
Cucsa.104340	MYB	CsGA2ox1	518	538	+	16.2812	8.34e-07	0.0894	gctttggtggtgggtggaaaa
Cucsa.090320	bHLH	CsD4H6	1340	1349	+	17.1719	8.34e-07	0.0985	tgccacgtgg
Cucsa.352410	WRKY	CsDOXC55.1	1493	1506	-	17.7656	8.36e-07	0.291	AGGGTTGACTTTTC
Cucsa.362960	MIKC_MADS	CsGA2ox5	1320	1340	+	16.6087	8.44e-07	0.00159	tttctttttctttttatcctt
Cucsa.362960	MIKC_MADS	CsDMR2	1960	1980	+	16.6087	8.44e-07	0.00159	ttttctttttttctttttcct
Cucsa.362960	MIKC_MADS	CsGA3ox2	871	891	-	16.6087	8.44e-07	0.00159	CTTTTTTTTTCTTCTTTCTTC
Cucsa.365320	ERF	CsDOXA6.1	1514	1528	-	16.8594	8.46e-07	0.0427	CCTTCATCGCCGCCG
Cucsa.102120	Dof	CsGA3ox2	1650	1678	+	16.3594	8.46e-07	0.00475	tgatccaaacttttttcttttttcttttt
Cucsa.061590	bHLH	CsDMR6	1770	1780	+	17.375	8.47e-07	0.136	ggcaagttgca
Cucsa.006170	MYB	CsGA20ox5	1679	1691	-	16.5949	8.48e-07	0.0991	AGGGTTGGTGAGA
Cucsa.353140	TALE	CsGA3ox1	649	668	+	17.1733	8.52e-07	0.00744	ctctctctctctctctctat
Cucsa.353140	TALE	CsGA2ox1	1690	1709	+	17.1733	8.52e-07	0.00744	ctctctctctctctctctat
Cucsa.196600	LBD	CsGA2ox7	791	811	-	16	8.54e-07	0.0391	ACTGCCAGCGCTGCCGCAGAT
Cucsa.307870	C2H2	CsDOXC21.3	1344	1362	+	16.4915	8.55e-07	0.00862	cttctacttcatcttccac
Cucsa.362960	MIKC_MADS	CsGA3ox2	864	884	-	16.5942	8.58e-07	0.0016	TTTCTTCTTTCTTCTCTTTTA
Cucsa.362960	MIKC_MADS	CsDOXC45.1	1460	1480	-	16.5942	8.58e-07	0.0016	CTTCCTCCTCTCTCGTTTCTT
Cucsa.336890	ERF	CsDOXC45.1	1006	1016	+	17.1094	8.61e-07	0.0601	ccaccaccacc
Cucsa.231820	ERF	CsLBO1	657	671	+	17.1094	8.64e-07	0.0333	cattttccaccgcca
Cucsa.112760	MYB	CsJOX2	353	371	-	16.9375	8.64e-07	0.0469	GTGTGGGTGGTTGATGGGG
Cucsa.277740	AP2	CsD4H4	1346	1365	-	16.8077	8.67e-07	0.00201	AAAAAGAAGAAAAAAAAAGA
Cucsa.277740	AP2	CsDOXA6.5	1102	1121	+	16.8077	8.67e-07	0.00201	aaaaaagagagagagagact
Cucsa.241900	Dof	CsD4H4	902	912	+	13.6875	8.67e-07	0.147	gaaaaagggaa
Cucsa.259560	HD-ZIP	CsF3H2	690	702	-	16.7812	8.7e-07	0.181	CCAATGATTGGTT
Cucsa.362960	MIKC_MADS	CsGA20ox3	1980	2000	-	16.5797	8.73e-07	0.00161	GGTTTTTTTTTTTTTTTTTTT
Cucsa.238090	TCP	CsACO5	1409	1438	-	15.8734	8.75e-07	0.0511	GGTGGGACCTGCCTTTGATGACTGTGACCC
Cucsa.102120	Dof	CsF6H1	1388	1416	+	16.3281	8.75e-07	0.00483	cctattttatttgtttctttttctttttc
Cucsa.026600	BBR-BPC	CsDMR5	1233	1256	+	11.1562	8.81e-07	0.00234	taaagaaagaaagaaagaaagaaa
Cucsa.178830	LBD	CsDOXC55.2	1163	1183	-	16.3906	8.84e-07	0.104	TTGATTGCGCCGCCGCCGCTG
Cucsa.194390	GATA	CsDOXB5.1	419	433	-	17.0735	8.84e-07	0.0347	TTGGTGGTGGTGATG
Cucsa.203800	Trihelix	CsDOXB3.4	1182	1198	+	16.9265	8.86e-07	0.103	aacacgtgtgaaaattt
Cucsa.362960	MIKC_MADS	CsD4H8	1476	1496	+	16.5652	8.87e-07	0.00161	ttttttccttttcttcttctt
Cucsa.362960	MIKC_MADS	CsDOXC45.1	795	815	-	16.5652	8.87e-07	0.00161	TTTCTTTTTCTTTTGCTCCGT
Cucsa.362960	MIKC_MADS	CsD4H4	891	911	-	16.5652	8.87e-07	0.00161	TCCCTTTTTCCTTTTCTTCTT
Cucsa.362960	MIKC_MADS	CsDOXB1.2	1758	1778	-	16.5652	8.87e-07	0.00161	TTCTTTTTTCTTTTTTTCCTG
Cucsa.213830	Dof	CsJOX2	1781	1801	+	16.1406	8.89e-07	0.00457	ttacctttttattttcttttc
Cucsa.213830	Dof	CsD4H4	885	905	-	16.1406	8.89e-07	0.00457	TTTCCTTTTCTTCTTTTTGTG
Cucsa.102120	Dof	CsDOXA6.3	1884	1912	-	16.3125	8.9e-07	0.00483	TTATAACTTTTTTTTTCTTTTTTTCTTTT
Cucsa.364380	bZIP	CsDOXC23.2	731	745	-	17.6406	8.91e-07	0.104	GTTGTCGACGTGGCA
Cucsa.328060	bHLH	CsDOXC23.2	119	133	-	17.4219	8.96e-07	0.224	CACGTGACCAACAAG
Cucsa.310360	ERF	CsDOXA6.4	184	204	+	14.2794	8.96e-07	0.035	tccagcccccgcaccaccgtc
Cucsa.051050	MYB	CsDOXC37.2	575	589	-	16.4219	8.98e-07	0.105	TCCAACTACCACCTT
Cucsa.353140	TALE	CsGA3ox1	653	672	+	17.0933	8.99e-07	0.00748	ctctctctctctctatctct
Cucsa.353140	TALE	CsGA2ox1	1694	1713	+	17.0933	8.99e-07	0.00748	ctctctctctctctatctct
Cucsa.213830	Dof	CsJOX2	134	154	-	16.125	9.05e-07	0.00458	CTTACTTTTTCCACTTTGTTT
Cucsa.359880	ERF	CsDOXB6.1	1795	1815	+	16.6719	9.06e-07	0.0532	tgcatgaagtggcggcaacgg
Cucsa.321150	ERF	CsLBO1	657	677	+	15.4219	9.1e-07	0.0458	cattttccaccgccaccaaca
Cucsa.231820	ERF	CsDOXA6.4	191	205	+	17.0312	9.11e-07	0.0333	cccgcaccaccgtcc
Cucsa.277740	AP2	CsJOX2	1884	1903	+	16.7564	9.12e-07	0.0021	aaaaaaaaaaaaaaaaaacg
Cucsa.341290	Dof	CsGA3ox2	1664	1684	-	15.2969	9.13e-07	0.0142	AAAAATAAAAAGAAAAAAGAA
Cucsa.026600	BBR-BPC	CsGA2ox4	432	455	+	11.0625	9.15e-07	0.00241	tggagatgaaaagagagacagaga
Cucsa.362960	MIKC_MADS	CsDOXC23.1	229	249	+	16.5362	9.17e-07	0.00165	ttttttctttttctttttctt
Cucsa.362960	MIKC_MADS	CsGA2ox1	1274	1294	-	16.5362	9.17e-07	0.00165	TTCTTCTTTTCTTTTCTTTTT
Cucsa.307870	C2H2	CsGA3ox3	1335	1353	+	16.3729	9.2e-07	0.0087	cctcctcttacatctcttc
Cucsa.307870	C2H2	CsGA2ox1	1518	1536	+	16.3729	9.2e-07	0.0087	ccccccccccccccctttc
Cucsa.213830	Dof	CsDOXC37.1	1969	1989	+	16.1094	9.2e-07	0.00458	ataactttttcttttctttct
Cucsa.251110	TCP	CsGA2ox3	1435	1444	+	17.2872	9.21e-07	0.0892	tgggtcccac
Cucsa.242910	bHLH	CsDMR6	1770	1780	-	16.6301	9.3e-07	0.13	TGCAACTTGCC
Cucsa.362960	MIKC_MADS	CsD4H4	1008	1028	-	16.5217	9.32e-07	0.00166	CTTTTTTCTTTTCTTTTTTTG
Cucsa.362960	MIKC_MADS	CsGA2ox1	1828	1848	-	16.5217	9.32e-07	0.00166	CCTTTATTTCTTTTTCTTTTT
Cucsa.341290	Dof	CsDOXB1.3	1201	1221	+	15.2812	9.34e-07	0.0142	taaaataaaaaggaaaaaaaa
Cucsa.258700	WRKY	CsDOXC55.1	1494	1506	+	17.0938	9.36e-07	0.322	aaaagtcaaccct
Cucsa.026600	BBR-BPC	CsGA2ox1	1783	1806	-	11	9.39e-07	0.00245	GATAGAAGGAAGGAGAGAATGAGG
Cucsa.307870	C2H2	CsGA2ox1	1515	1533	+	16.339	9.39e-07	0.0087	cccccccccccccccccct
Cucsa.231820	ERF	CsDOXA6.1	1514	1528	-	16.9844	9.41e-07	0.0333	CCTTCATCGCCGCCG
Cucsa.026600	BBR-BPC	CsDOXC37.2	707	730	-	10.9844	9.45e-07	0.00245	GAAGGGGAGAGAGAAATAAAGATT
Cucsa.362960	MIKC_MADS	CsACO4	1787	1807	+	16.5072	9.47e-07	0.00166	cttctctcttcttcttcttct
Cucsa.362960	MIKC_MADS	CsGA2ox3	820	840	-	16.5072	9.47e-07	0.00166	TCTTTTCTTTTCTTTTTTTTA
Cucsa.362960	MIKC_MADS	CsDOXB1.2	1761	1781	-	16.5072	9.47e-07	0.00166	TGTTTCTTTTTTCTTTTTTTC
Cucsa.280310	GRAS	CsDOXB3.4	1940	1959	-	16.2464	9.48e-07	0.014	GGGAGAGAGAGAGAGAGAGT
Cucsa.359570	GATA	CsGA7ox1	198	212	-	14.8438	9.49e-07	0.0517	TCCTCATCATCACCA
Cucsa.104970	bZIP	CsDOXB3.4	1812	1821	+	15.0957	9.49e-07	0.112	tgacgtggca
Cucsa.353140	TALE	CsDOXC55.1	681	700	-	17.0133	9.49e-07	0.00771	CCCTCTCCCCCTCTCAGTTT
Cucsa.234310	MYB	CsGA20ox5	1680	1694	-	14.7812	9.53e-07	0.104	AATAGGGTTGGTGAG
Cucsa.213830	Dof	CsGA7ox2	1605	1625	-	16.0781	9.53e-07	0.00468	TTTCCCTTTTCTTTTTTTCTT
Cucsa.237150	ERF	CsDOXC55.2	485	504	-	16.4531	9.57e-07	0.0631	CGCTGCTGCTCCCACCATCG
Cucsa.277740	AP2	CsGA3ox2	877	896	+	16.7051	9.58e-07	0.00219	agaagaaaaaaaaagaaaga
Cucsa.112760	MYB	CsGA3ox3	1323	1341	-	16.8281	9.61e-07	0.0469	GAGGAGGTAGTTGTGTGTT
Cucsa.042770	ERF	CsDOXC45.1	994	1014	+	16.4844	9.66e-07	0.034	ctactgataccgccaccacca
Cucsa.277740	AP2	CsGA20ox3	47	66	+	16.6923	9.69e-07	0.0022	gagagagagtaagagagaaa
Cucsa.213830	Dof	CsDOXC45.1	801	821	-	16.0625	9.69e-07	0.00468	TCTTCTTTTCTTTTTCTTTTG
Cucsa.252700	MYB	CsGA2ox2	200	209	-	16.0577	9.7e-07	0.343	AGGTAGGTGG
Cucsa.026600	BBR-BPC	CsDOXB1.2	311	334	+	10.9062	9.75e-07	0.00251	gaaagaagaagagagaaaaaaaaa
Cucsa.280310	GRAS	CsDOXC20.4	796	815	-	16.2174	9.76e-07	0.014	AAGAAAAAGACAAAGATCAT
Cucsa.341290	Dof	CsGA2ox3	846	866	+	15.25	9.76e-07	0.0142	aaaaagaaaaagaagaaacgt
Cucsa.362960	MIKC_MADS	CsDOXC55.1	994	1014	+	16.4783	9.79e-07	0.00171	tcttttcttttcttttccttt
Cucsa.239590	WRKY	CsDOXC55.1	1494	1506	-	15.9219	9.82e-07	0.323	AGGGTTGACTTTT
Cucsa.185800	NAC	CsGA3ox2	860	878	-	16.9844	9.85e-07	0.347	CTTTCTTCTCTTTTAAGAA
Cucsa.198520	bHLH	CsDOXC37.3	1888	1901	-	17.375	9.85e-07	0.143	CACGTGACGATCCT
Cucsa.307870	C2H2	CsDOXC20.5	1359	1377	-	16.2542	9.9e-07	0.00893	CCTCCTTAACACCCTCATC
Cucsa.196600	LBD	CsDOXA6.1	1125	1145	+	15.7344	9.9e-07	0.0391	gccgccaaagccgccacagcg
Cucsa.277740	AP2	CsDOXA6.5	1593	1612	-	16.6667	9.92e-07	0.00222	AGTAAAAAAGAGAAGAAAAG
Cucsa.277740	AP2	CsDOXB1.2	313	332	+	16.6667	9.92e-07	0.00222	aagaagaagagagaaaaaaa
Cucsa.362960	MIKC_MADS	CsGA3ox2	1660	1680	+	16.4638	9.95e-07	0.00172	ttttttcttttttctttttat
Cucsa.362960	MIKC_MADS	CsDOXB3.3	1907	1927	+	16.4638	9.95e-07	0.00172	tttttcctttttccttcctcg
Cucsa.258940	bZIP	CsDOXC23.1	1008	1022	+	17.2031	9.95e-07	0.0704	agccacgtgatcaca
Cucsa.175390	Dof	CsDOXB3.2	1450	1464	-	15.0312	9.97e-07	0.0565	CCTTTTTACTTTTTT
Cucsa.334870	ERF	CsDMR2	1986	2000	+	17.0938	9.97e-07	0.0705	ctactccggccggcg
Cucsa.060600	NAC	CsD4H1	643	664	+	15.8438	9.97e-07	0.351	tccgtgacacactcccccactt
Cucsa.288680	NAC	CsACO1	1111	1125	+	16.9062	9.98e-07	0.242	atcgtgaggctgaag
Cucsa.242740	C3H	CsDOXB3.3	1909	1922	-	13.8906	9.98e-07	0.0852	AAGGAAAAAGGAAA
Cucsa.196600	LBD	CsDOXA6.1	1503	1523	-	15.7188	9.98e-07	0.0391	ATCGCCGCCGCTGGTGGTGCG
Cucsa.341290	Dof	CsD4H4	897	917	+	15.2344	9.99e-07	0.0142	aaaaggaaaaagggaaaggtt
Cucsa.342790	MIKC_MADS	CsGA3ox3	169	183	+	16.4265	9.99e-07	0.113	ttcccaaaggagaaa
Cucsa.026600	BBR-BPC	CsGA2ox3	1177	1200	-	10.8438	1e-06	0.00255	GGGAAAGAAAGAAAAAGAAAAATT
Cucsa.277740	AP2	CsJOX2	1216	1235	-	16.6538	1.01e-06	0.00224	AATAACAAAGGAGAAAGAAG
Cucsa.026600	BBR-BPC	CsGA3ox1	534	557	+	10.8281	1.01e-06	0.00255	taagaaggaaaagagagagagagg
Cucsa.159750	BBR-BPC	CsGA2ox1	849	869	+	10.8219	1.01e-06	0.00355	ctatttctctttcttcatcta
Cucsa.102560	ERF	CsDOXA6.1	1514	1528	-	17.2188	1.01e-06	0.138	CCTTCATCGCCGCCG
Cucsa.362960	MIKC_MADS	CsGA2ox5	1057	1077	+	16.4493	1.01e-06	0.00174	ctctattctttttctttttct
Cucsa.026600	BBR-BPC	CsDOXC37.1	1788	1811	-	10.8125	1.01e-06	0.00255	GAGATATATATAGAGAAAAAGAGA
Cucsa.102120	Dof	CsJOX2	1768	1796	+	16.1875	1.01e-06	0.00542	accctctccccttttacctttttattttc
Cucsa.098430	Dof	CsGA3ox2	1660	1680	-	15.4531	1.02e-06	0.0116	ATAAAAAGAAAAAAGAAAAAA
Cucsa.107190	ERF	CsDOXC55.2	1170	1177	-	18.3936	1.02e-06	0.18	GCGCCGCC
Cucsa.069280	ERF	CsDOXC55.2	1167	1174	-	16.9327	1.02e-06	0.18	CCGCCGCC
Cucsa.271720	ERF	CsDOXA6.4	193	211	-	16.4219	1.02e-06	0.0399	TGGGAGGGACGGTGGTGCG
Cucsa.349220	Trihelix	CsLBO1	555	572	+	15	1.02e-06	0.18	aaacaaaaaggccctaaa
Cucsa.104340	MYB	CsDOXB1.1	1002	1022	+	16.0938	1.02e-06	0.0894	tgggtcatgtttggtggaaca
Cucsa.198520	bHLH	CsLBO1	1763	1776	-	17.3281	1.02e-06	0.143	CACGTGAGTTTCAC
Cucsa.158340	MYB	CsGA3ox3	1325	1339	+	16.4531	1.02e-06	0.0541	cacacaactacctcc
Cucsa.362960	MIKC_MADS	CsDOXC55.2	8	28	+	16.4348	1.03e-06	0.00176	ttttcctttgtttttttcttt
Cucsa.118450	MYB	CsDOXC37.2	576	596	-	16.9531	1.03e-06	0.0604	GTGCGCCTCCAACTACCACCT
Cucsa.396070	bZIP	CsDOXC23.1	1003	1020	+	17.3438	1.04e-06	0.0914	aagagagccacgtgatca
Cucsa.054000	TCP	CsDMR1	712	720	+	17.0319	1.04e-06	0.0869	tgggcccac
Cucsa.054000	TCP	CsD4H9	718	726	-	17.0319	1.04e-06	0.0869	TGGGCCCAC
Cucsa.103500	HD-ZIP	CsGA2ox5	100	109	-	14.6438	1.04e-06	0.182	CCCAATCATT
Cucsa.047510	WRKY	CsDOXC55.1	1494	1504	+	16.5938	1.04e-06	0.244	aaaagtcaacc
Cucsa.103500	HD-ZIP	CsD4H3	1444	1453	+	14.6438	1.04e-06	0.182	cccaatcatt
Cucsa.193460	NAC	CsDOXA6.2	1070	1081	-	17.0673	1.04e-06	0.367	GATTGCGTAATT
Cucsa.026600	BBR-BPC	CsGA2ox5	1030	1053	-	10.75	1.04e-06	0.00259	GAGAGTGTGTGAGAGAAAGAGGGC
Cucsa.277740	AP2	CsGA2ox4	765	784	-	16.6154	1.04e-06	0.00229	AATAAAAAAAGAGAAAAAAA
Cucsa.277740	AP2	CsGA2ox3	820	839	+	16.6154	1.04e-06	0.00229	taaaaaaaagaaaagaaaag
Cucsa.118450	MYB	CsGA2ox5	909	929	-	16.9375	1.04e-06	0.0604	CCCCTCTCCCAACTACTACAC
Cucsa.129320	ERF	CsDOXA6.1	1429	1443	+	16.375	1.04e-06	0.0569	acaatggcggcgaaa
Cucsa.362960	MIKC_MADS	CsGA2ox5	1243	1263	+	16.4203	1.04e-06	0.00178	cgtcttcatctctctctcttc
Cucsa.341290	Dof	CsDOXC55.4	721	741	+	15.2031	1.04e-06	0.0142	aaggaaaaaaagaaaaagaaa
Cucsa.112090	C2H2	CsD4H8	193	207	+	16.9062	1.05e-06	0.125	caaataagacaaata
Cucsa.353140	TALE	CsGA2ox2	1819	1838	+	16.8667	1.05e-06	0.00823	tctcccctctctctctcgtc
Cucsa.047860	TCP	CsDMR1	713	720	+	18.5385	1.05e-06	0.186	gggcccac
Cucsa.047860	TCP	CsD4H9	718	725	-	18.5385	1.05e-06	0.186	GGGCCCAC
Cucsa.102120	Dof	CsJOX1	117	145	-	16.1562	1.05e-06	0.00543	TTATCTTTTCCCTTTTCTTTTTAATGTTT
Cucsa.102120	Dof	CsD4H8	1478	1506	+	16.1562	1.05e-06	0.00543	ttttccttttcttcttctttatatttgtt
Cucsa.197650	TCP	CsACO3	1712	1731	-	9.76744	1.05e-06	0.0529	GTTAAGGGAATGGGACCCAC
Cucsa.307870	C2H2	CsACO3	1146	1164	-	16.1525	1.05e-06	0.00927	CCCCCCCCCCCCCCCCCAA
Cucsa.102530	bHLH	CsACO4	1259	1267	+	15.6064	1.06e-06	0.125	gccacgtgc
Cucsa.026600	BBR-BPC	CsGA3ox1	1118	1141	+	10.7031	1.06e-06	0.00262	tttaggaagagaggaagagaggaa
Cucsa.362960	MIKC_MADS	CsDOXB1.1	900	920	+	16.4058	1.06e-06	0.00179	tttttttttttttttttgttt
Cucsa.362960	MIKC_MADS	CsD4H6	1251	1271	+	16.4058	1.06e-06	0.00179	cttctctttctttcatttttt
Cucsa.280310	GRAS	CsDOXC21.3	1904	1923	-	16.1304	1.06e-06	0.0146	AAGACAAAGACAAAGTGAGT
Cucsa.353140	TALE	CsGA2ox2	1811	1830	+	16.84	1.07e-06	0.00823	ctctcttttctcccctctct
Cucsa.112760	MYB	CsDMR6	484	502	+	16.7188	1.07e-06	0.0469	gaagtggtagttgaagagg
Cucsa.363170	HD-ZIP	CsGA2ox5	1161	1171	-	16.4219	1.07e-06	0.34	GCATTAATTAC
Cucsa.220080	G2-like	CsDOXC27.1	1526	1536	+	15.9375	1.07e-06	0.367	atcaaagattc
Cucsa.130050	G2-like	CsF3H2	707	717	-	14.25	1.07e-06	0.184	AAGAGAATGTT
Cucsa.130050	G2-like	CsDOXC52.2	768	778	-	14.25	1.07e-06	0.184	AAGAGAATGTT
Cucsa.341290	Dof	CsDOXC20.4	564	584	-	15.1875	1.07e-06	0.0142	AAAAATAAAAAGTAAATAGGA
Cucsa.341290	Dof	CsGA20ox1	1581	1601	+	15.1875	1.07e-06	0.0142	taaatcaaaaagtaaaacaag
Cucsa.112810	Dof	CsDOXB3.3	146	164	+	15.7656	1.07e-06	0.0345	aaaaagaaaaaaggaaaag
Cucsa.112810	Dof	CsGA20ox3	1956	1974	-	15.7656	1.07e-06	0.0345	CAGGAGGGAAAAGTGAATA
Cucsa.118450	MYB	CsD4H6	1905	1925	+	16.9062	1.07e-06	0.0604	cccaccattcaccaaaccact
Cucsa.127860	MYB	CsDMR1	334	344	+	16.1875	1.07e-06	0.126	cgggttggtgg
Cucsa.136780	ERF	CsDOXB5.1	423	443	-	15.75	1.07e-06	0.048	GATGTCTACGTTGGTGGTGGT
Cucsa.337320	MYB	CsGA2ox5	908	926	-	16.6875	1.08e-06	0.0749	CTCTCCCAACTACTACACT
Cucsa.026600	BBR-BPC	CsDOXC24.1	1476	1499	+	10.6562	1.08e-06	0.00265	aatggagagagatagagtaggcgg
Cucsa.363020	TCP	CsGA2ox3	1385	1405	+	15.1324	1.08e-06	0.0772	tatactacactgggccccaca
Cucsa.277740	AP2	CsF3H2	1823	1842	-	16.5769	1.08e-06	0.00235	CAAAAAGAGAAAAAAAAAAA
Cucsa.277740	AP2	CsD4H4	1045	1064	+	16.5769	1.08e-06	0.00235	gaagaagaaaggaagataaa
Cucsa.102120	Dof	CsDMR5	1225	1253	-	16.125	1.08e-06	0.00552	CTTTCTTTCTTTCTTTCTTTATTTTTGTC
Cucsa.159750	BBR-BPC	CsGA2ox1	1896	1916	+	10.6301	1.08e-06	0.00374	cactctctttttcttcctctg
Cucsa.098430	Dof	CsDOXC45.1	798	818	+	15.4062	1.08e-06	0.0116	gagcaaaagaaaaagaaaaga
Cucsa.098430	Dof	CsDOXC3.2	1160	1180	-	15.4062	1.08e-06	0.0116	AAAAAACGCAAAAAGAAAAAT
Cucsa.158340	MYB	CsGA2ox5	910	924	-	16.3906	1.08e-06	0.0541	CTCCCAACTACTACA
Cucsa.129320	ERF	CsDMR1	321	335	+	16.2969	1.08e-06	0.0569	atggtggtggcgacg
Cucsa.353140	TALE	CsGA3ox1	1123	1142	-	16.8133	1.08e-06	0.00823	CTTCCTCTCTTCCTCTCTTC
Cucsa.026600	BBR-BPC	CsGA2ox3	835	858	+	10.6406	1.08e-06	0.00265	aaaagaaaaagaaaaagaaaaaga
Cucsa.127480	ZF-HD	CsDOXC55.4	518	532	+	13.9853	1.09e-06	0.179	aaatgtaattagggt
Cucsa.018420	MIKC_MADS	CsDOXC20.3	1400	1413	-	16.3906	1.09e-06	0.0921	CCAGAAAAAGAAAA
Cucsa.341290	Dof	CsACO4	791	811	+	15.1719	1.09e-06	0.0142	tagaagaaaaaggaaaagcac
Cucsa.213830	Dof	CsDOXB6.1	913	933	+	15.9531	1.09e-06	0.00521	tcagcttttttttttttttcc
Cucsa.159750	BBR-BPC	CsDOXC21.2	258	278	-	10.6027	1.09e-06	0.00374	CACTCTCCATCTCTCTTCCTT
Cucsa.362960	MIKC_MADS	CsGA2ox3	837	857	-	16.3768	1.1e-06	0.00184	CTTTTTCTTTTTCTTTTTCTT
Cucsa.363020	TCP	CsACO5	1426	1446	-	15.1029	1.1e-06	0.0772	TCATGAAAGGTGGGACCTGCC
Cucsa.321050	ERF	CsDOXB6.1	821	835	+	17.2188	1.1e-06	0.388	ttttgtcggtggttt
Cucsa.026600	BBR-BPC	CsDMR2	252	275	-	10.6094	1.1e-06	0.00266	TATATAGAGAGAGAGAGAGATTTT
Cucsa.242910	bHLH	CsDOXC23.2	156	166	-	16.5205	1.1e-06	0.13	AGCAACTTGCA
Cucsa.363020	TCP	CsACO5	1418	1438	+	15.0882	1.1e-06	0.0772	tcatcaaaggcaggtcccacc
Cucsa.026600	BBR-BPC	CsDOXA6.5	1096	1119	+	10.5938	1.11e-06	0.00266	aaagagaaaaaagagagagagaga
Cucsa.042770	ERF	CsDMR1	322	342	-	16.2656	1.11e-06	0.0353	ACCAACCCGTCGCCACCACCA
Cucsa.159750	BBR-BPC	CsDOXB3.4	1947	1967	+	10.5753	1.11e-06	0.00374	ctctctctctccctctcgcgc
Cucsa.159750	BBR-BPC	CsGA3ox1	1120	1140	-	10.5753	1.11e-06	0.00374	TCCTCTCTTCCTCTCTTCCTA
Cucsa.136780	ERF	CsDOXB5.1	420	440	-	15.6912	1.11e-06	0.048	GTCTACGTTGGTGGTGGTGAT
Cucsa.277740	AP2	CsJOX1	1927	1946	+	16.5513	1.11e-06	0.00239	aaaacagaaaaaaaaaaaaa
Cucsa.213830	Dof	CsDOXB1.3	1731	1751	-	15.9375	1.11e-06	0.00522	TTTTCTTTTATTTTTCTCTCT
Cucsa.194390	GATA	CsGA7ox1	164	178	+	16.7647	1.12e-06	0.0395	atgatgatgacgatc
Cucsa.306580	MYB	CsGA3ox4	132	146	-	17.1875	1.12e-06	0.0973	AATAAATTAGGTATA
Cucsa.306580	MYB	CsACO5	1705	1719	-	17.1875	1.12e-06	0.0973	AATAAATTAGGTATA
Cucsa.026600	BBR-BPC	CsF3H2	204	227	-	10.5625	1.12e-06	0.00267	GAGGGGCAGGGAGAGGAAGAAAAG
Cucsa.159750	BBR-BPC	CsDOXC45.1	1344	1364	-	10.5342	1.12e-06	0.00376	TCCTCTTCCCCTCTCACTCGC
Cucsa.353140	TALE	CsGA2ox5	485	504	+	16.76	1.12e-06	0.00835	ttcccccctcttccctctac
Cucsa.026600	BBR-BPC	CsF3H2	214	237	-	10.5469	1.13e-06	0.00267	CAGGTGTAGAGAGGGGCAGGGAGA
Cucsa.129320	ERF	CsLBO1	661	675	-	16.2188	1.13e-06	0.0569	TTGGTGGCGGTGGAA
Cucsa.213830	Dof	CsDOXC45.1	244	264	-	15.9219	1.13e-06	0.00523	TTTTCTTTTCTTTTCTTCTAT
Cucsa.336890	ERF	CsLBO1	663	673	+	16.75	1.14e-06	0.0601	ccaccgccacc
Cucsa.307870	C2H2	CsGA7ox1	199	217	-	16.0254	1.14e-06	0.0094	CATCATCCTCATCATCACC
Cucsa.307870	C2H2	CsDOXB5.1	1873	1891	-	16.0254	1.14e-06	0.0094	CTTCATCATCCTCGTTCAC
Cucsa.045040	WRKY	CsDOXC55.4	1785	1805	+	16.7647	1.14e-06	0.398	tcgtactcaccgttgactaca
Cucsa.159750	BBR-BPC	CsDOXC37.1	1789	1809	+	10.4932	1.14e-06	0.00378	ctctttttctctatatatatc
Cucsa.280310	GRAS	CsGA20ox1	1949	1968	-	16.058	1.14e-06	0.0148	AAGAGGGTGACAAAAGAAAA
Cucsa.271720	ERF	CsDOXA6.1	1122	1140	-	16.2188	1.14e-06	0.0403	TGGCGGCTTTGGCGGCAGC
Cucsa.362960	MIKC_MADS	CsGA3ox1	660	680	+	16.3333	1.15e-06	0.00191	tctctctatctctctatctct
Cucsa.362960	MIKC_MADS	CsGA3ox1	668	688	+	16.3333	1.15e-06	0.00191	tctctctatctctctatctct
Cucsa.277740	AP2	CsDOXC55.1	994	1013	-	16.5128	1.15e-06	0.00242	AAGGAAAAGAAAAGAAAAGA
Cucsa.277740	AP2	CsACO3	51	70	+	16.5128	1.15e-06	0.00242	aaaaacgaaaatgaaagaaa
Cucsa.277740	AP2	CsDOXC52.2	200	219	+	16.5128	1.15e-06	0.00242	aggaaagaaggaaatagaaa
Cucsa.277740	AP2	CsGA2ox3	825	844	+	16.5128	1.15e-06	0.00242	aaaagaaaagaaaagaaaaa
Cucsa.307870	C2H2	CsGA2ox1	1505	1523	+	16.0085	1.15e-06	0.0094	tctctcccacccccccccc
Cucsa.325250	CAMTA	CsDOXC17.2	1062	1079	+	16.4688	1.16e-06	0.102	ccatgtctagaccgtgtg
Cucsa.378700	HD-ZIP	CsD4H1	1896	1908	+	16.4923	1.16e-06	0.123	ttcaattattgat
Cucsa.026600	BBR-BPC	CsDOXB1.2	307	330	+	10.4688	1.16e-06	0.00274	aagggaaagaagaagagagaaaaa
Cucsa.277740	AP2	CsD4H1	120	139	+	16.5	1.16e-06	0.00243	ataaaagaaaagaaaagaaa
Cucsa.362960	MIKC_MADS	CsGA2ox1	1681	1701	+	16.3188	1.17e-06	0.00193	ccactctctctctctctctct
Cucsa.213830	Dof	CsDMR5	56	76	+	15.8906	1.17e-06	0.00534	tctcctttttgcttctttgtt
Cucsa.362960	MIKC_MADS	CsJOX1	1931	1951	-	16.3043	1.19e-06	0.00195	GTTTTTTTTTTTTTTTTTCTG
Cucsa.175460	MYB	CsDOXC13.1	1372	1386	-	16.4219	1.19e-06	0.112	CAATTATAGCCGTTG
Cucsa.213830	Dof	CsGA2ox1	1831	1851	-	15.875	1.19e-06	0.00535	TTCCCTTTATTTCTTTTTCTT
Cucsa.026600	BBR-BPC	CsGA2ox1	1503	1526	-	10.4062	1.19e-06	0.00279	GGGGGGGGGGGGGTGGGAGAGAGT
Cucsa.112810	Dof	CsD4H5	689	707	-	15.6719	1.2e-06	0.0345	AAGAAAAAAAAAGTGATAA
Cucsa.090320	bHLH	CsDOXC37.2	1653	1662	+	16.9844	1.2e-06	0.106	acccacgtgg
Cucsa.306580	MYB	CsDOXC21.1	1753	1767	+	17.125	1.2e-06	0.0973	ctaaaattaggtaag
Cucsa.159750	BBR-BPC	CsDOXC37.1	1787	1807	+	10.3562	1.2e-06	0.00394	ttctctttttctctatatata
Cucsa.234310	MYB	CsGA20ox3	275	289	+	14.6719	1.2e-06	0.104	attgaagttggtggg
Cucsa.277740	AP2	CsDMR2	1965	1984	-	16.4615	1.2e-06	0.0025	AAAAAGGAAAAAGAAAAAAA
Cucsa.026600	BBR-BPC	CsDMR5	1255	1278	+	10.375	1.21e-06	0.0028	aagaaagaaagaaagaaatagatt
Cucsa.213830	Dof	CsGA20ox2	1974	1994	-	15.8594	1.21e-06	0.00537	TATTCTTTTTATTTTCTTTTT
Cucsa.061590	bHLH	CsDMR4	1883	1893	-	16.9062	1.21e-06	0.136	GGCAAGTTGCT
Cucsa.198520	bHLH	CsDOXC23.2	120	133	-	17.125	1.22e-06	0.143	CACGTGACCAACAA
Cucsa.112090	C2H2	CsDOXC20.5	303	317	+	16.7969	1.22e-06	0.125	agataaagacaaaat
Cucsa.112810	Dof	CsDMR2	880	898	+	15.6562	1.22e-06	0.0345	aaagatgaaaaagtgatca
Cucsa.341290	Dof	CsGA2ox1	1828	1848	+	15.0938	1.22e-06	0.0142	aaaaagaaaaagaaataaagg
Cucsa.341290	Dof	CsACO3	1954	1974	+	15.0938	1.22e-06	0.0142	acacaaaaaaaggaaaagaaa
Cucsa.307870	C2H2	CsDOXC37.2	715	733	+	15.9153	1.22e-06	0.00973	tttctctctccccttcctc
Cucsa.321150	ERF	CsDMR1	373	393	-	14.7188	1.22e-06	0.0538	GTCCCGTCGCCACCACCAATC
Cucsa.197650	TCP	CsACO5	1427	1446	-	9.25581	1.22e-06	0.053	TCATGAAAGGTGGGACCTGC
Cucsa.250070	Trihelix	CsGA2ox3	1058	1073	-	15.1094	1.22e-06	0.4	AGGGTAAAAAAGAAAA
Cucsa.362960	MIKC_MADS	CsGA2ox5	1110	1130	+	16.2754	1.22e-06	0.00199	ctctttcttttctttttcccc
Cucsa.362960	MIKC_MADS	CsGA2ox1	1818	1838	-	16.2754	1.22e-06	0.00199	TTTTTCTTTTTCTTTTCTCTC
Cucsa.280310	GRAS	CsDOXC23.1	991	1010	+	15.9855	1.23e-06	0.0148	caaaaggggacaaagagagc
Cucsa.118330	NAC	CsDOXB6.1	1798	1817	-	16.7656	1.23e-06	0.434	TGCCGTTGCCGCCACTTCAT
Cucsa.102120	Dof	CsDOXC55.1	995	1023	+	16	1.23e-06	0.00618	cttttcttttcttttcctttttggaaaaa
Cucsa.284890	NAC	CsFLS1	153	163	+	15.1094	1.24e-06	0.431	acacgtaactt
Cucsa.353140	TALE	CsGA2ox1	1754	1773	+	16.6133	1.24e-06	0.009	ctctccctccttttctctct
Cucsa.114750	Nin-like	CsGA2ox7	1665	1679	-	15.2812	1.24e-06	0.439	TTTTGACTTTTGGGG
Cucsa.359570	GATA	CsDOXB1.1	1942	1956	+	14.25	1.24e-06	0.0536	ttttcatcatcatca
Cucsa.280310	GRAS	CsGA3ox1	648	667	-	15.971	1.24e-06	0.0148	TAGAGAGAGAGAGAGAGAGA
Cucsa.280310	GRAS	CsGA2ox1	1689	1708	-	15.971	1.24e-06	0.0148	TAGAGAGAGAGAGAGAGAGA
Cucsa.362960	MIKC_MADS	CsF6H1	1397	1417	+	16.2609	1.24e-06	0.00199	tttgtttctttttctttttcc
Cucsa.362960	MIKC_MADS	CsGA2ox3	821	841	-	16.2609	1.24e-06	0.00199	TTCTTTTCTTTTCTTTTTTTT
Cucsa.362960	MIKC_MADS	CsGA2ox1	1268	1288	-	16.2609	1.24e-06	0.00199	TTTTCTTTTCTTTTTTTTTTA
Cucsa.362960	MIKC_MADS	CsGA2ox1	1271	1291	-	16.2609	1.24e-06	0.00199	TTCTTTTCTTTTCTTTTTTTT
Cucsa.341290	Dof	CsDOXB6.1	908	928	-	15.0781	1.25e-06	0.0142	AAAAAAAAAAAGCTGAAGGCA
Cucsa.352470	ERF	CsLBO1	657	671	+	16.8594	1.25e-06	0.063	cattttccaccgcca
Cucsa.102120	Dof	CsGA2ox5	1752	1780	+	15.9844	1.25e-06	0.00619	ttccatccctttttcccttttcgtttact
Cucsa.098430	Dof	CsACO3	1957	1977	+	15.2969	1.25e-06	0.0125	caaaaaaaggaaaagaaaaaa
Cucsa.196600	LBD	CsDOXB6.1	225	245	+	15.2969	1.26e-06	0.0443	tctaccgtctgtgcaggcggc
Cucsa.012850	ERF	CsDOXA6.1	1502	1522	-	14.9853	1.26e-06	0.0334	TCGCCGCCGCTGGTGGTGCGA
Cucsa.018420	MIKC_MADS	CsGA3ox3	171	184	+	16.25	1.26e-06	0.0921	cccaaaggagaaaa
Cucsa.164580	MYB	CsDOXB3.2	615	629	+	15.4375	1.27e-06	0.219	aaccttatcattttc
Cucsa.353050	bHLH	CsDOXC23.2	119	139	+	16.9041	1.27e-06	0.195	cttgttggtcacgtggctttt
Cucsa.328060	bHLH	CsLBO1	1762	1776	-	16.9688	1.27e-06	0.224	CACGTGAGTTTCACT
Cucsa.102120	Dof	CsDOXB1.2	297	325	-	15.9688	1.27e-06	0.0062	CTCTCTTCTTCTTTCCCTTTCTTCTCCAT
Cucsa.088640	ERF	CsDOXC45.1	1005	1019	-	16.5312	1.27e-06	0.0626	CCTGGTGGTGGTGGC
Cucsa.349500	TCP	CsD4H9	717	726	-	16.4327	1.28e-06	0.0825	TGGGCCCACA
Cucsa.277740	AP2	CsGA2ox5	1059	1078	-	16.3974	1.28e-06	0.00253	AAGAAAAAGAAAAAGAATAG
Cucsa.098430	Dof	CsGA20ox5	338	358	+	15.2812	1.28e-06	0.0125	aagaacataaaaaaggaaaaa
Cucsa.098430	Dof	CsGA2ox5	1064	1084	-	15.2812	1.28e-06	0.0125	AAATGAAAGAAAAAGAAAAAG
Cucsa.026600	BBR-BPC	CsDOXB1.2	309	332	+	10.2188	1.28e-06	0.00296	gggaaagaagaagagagaaaaaaa
Cucsa.136780	ERF	CsDOXA6.4	196	216	-	15.4118	1.29e-06	0.048	TAGGGTGGGAGGGACGGTGGT
Cucsa.102120	Dof	CsF6H1	1364	1392	+	15.9531	1.29e-06	0.0062	cctccttatcccttttcttttcctcctat
Cucsa.046660	ERF	CsDOXB6.1	1803	1819	+	15.4219	1.29e-06	0.0675	gtggcggcaacggcaag
Cucsa.175460	MYB	CsF3H1	163	177	+	16.3594	1.29e-06	0.112	aaaaagtagccgtta
Cucsa.277740	AP2	CsGA3ox1	654	673	-	16.3846	1.3e-06	0.00253	GAGAGATAGAGAGAGAGAGA
Cucsa.277740	AP2	CsGA2ox1	1695	1714	-	16.3846	1.3e-06	0.00253	GAGAGATAGAGAGAGAGAGA
Cucsa.277740	AP2	CsDOXC45.1	244	263	+	16.3846	1.3e-06	0.00253	atagaagaaaagaaaagaaa
Cucsa.277740	AP2	CsDOXA6.3	1887	1906	+	16.3846	1.3e-06	0.00253	agaaaaaaagaaaaaaaaag
Cucsa.271720	ERF	CsDOXA6.1	1508	1526	+	16	1.3e-06	0.0416	caccagcggcggcgatgaa
Cucsa.341290	Dof	CsDOXC23.1	226	246	-	15.0469	1.3e-06	0.0142	AAAAAGAAAAAGAAAAAACTC
Cucsa.362960	MIKC_MADS	CsACO3	1956	1976	-	16.2174	1.3e-06	0.00207	TTTTTCTTTTCCTTTTTTTGT
Cucsa.255340	ERF	CsDOXA6.1	1420	1447	-	15.7031	1.3e-06	0.0624	GTGATTTCGCCGCCATTGTTAGTGAAAA
Cucsa.026600	BBR-BPC	CsGA3ox1	536	559	+	10.1719	1.31e-06	0.00299	agaaggaaaagagagagagaggat
Cucsa.277740	AP2	CsGA2ox3	1017	1036	-	16.3718	1.31e-06	0.00253	AAAAGAAAAGAAAAGAAAAG
Cucsa.277740	AP2	CsGA2ox3	1022	1041	-	16.3718	1.31e-06	0.00253	AAAAGAAAAGAAAAGAAAAG
Cucsa.277740	AP2	CsGA2ox3	1027	1046	-	16.3718	1.31e-06	0.00253	AAAAGAAAAGAAAAGAAAAG
Cucsa.277740	AP2	CsGA2ox3	1032	1051	-	16.3718	1.31e-06	0.00253	AAAAGAAAAGAAAAGAAAAG
Cucsa.277740	AP2	CsGA2ox3	1037	1056	-	16.3718	1.31e-06	0.00253	AAAAGAAAAGAAAAGAAAAG
Cucsa.277740	AP2	CsGA2ox3	1042	1061	-	16.3718	1.31e-06	0.00253	AAAAGAAAAGAAAAGAAAAG
Cucsa.277740	AP2	CsGA2ox3	1047	1066	-	16.3718	1.31e-06	0.00253	AAAAGAAAAGAAAAGAAAAG
Cucsa.139620	MIKC_MADS	CsDOXC52.4	517	534	-	15.7468	1.31e-06	0.327	ATGGCCTTATCGGGAACA
Cucsa.102120	Dof	CsGA20ox1	1962	1990	+	15.9375	1.31e-06	0.00621	ccctcttttctaatttctttttctctcta
Cucsa.307870	C2H2	CsGA2ox1	1517	1535	+	15.7881	1.32e-06	0.01	ccccccccccccccccttt
Cucsa.359880	ERF	CsDOXC55.2	1095	1115	-	15.9844	1.32e-06	0.0664	AACGGAGAGAGGCGGCTGAGC
Cucsa.102560	ERF	CsLBO1	663	677	+	16.8594	1.32e-06	0.138	ccaccgccaccaaca
Cucsa.363020	TCP	CsDOXC23.1	1368	1388	-	14.6765	1.32e-06	0.0772	TTAGAGGTTGTGGATCCCACA
Cucsa.307870	C2H2	CsACO4	1803	1821	+	15.7797	1.33e-06	0.01	cttcttcttcttcttctgc
Cucsa.012850	ERF	CsDOXC45.1	1000	1020	+	14.8824	1.33e-06	0.0334	ataccgccaccaccaccaggt
Cucsa.005360	bHLH	CsACO4	1253	1273	-	16.7344	1.33e-06	0.234	TAGCATGCACGTGGCAATGTC
Cucsa.158340	MYB	CsD4H2	372	386	-	16.1562	1.33e-06	0.0583	TTCCCAACCACTAAT
Cucsa.102120	Dof	CsGA2ox3	1011	1039	+	15.9219	1.33e-06	0.00622	ctacttcttttcttttcttttcttttctt
Cucsa.129320	ERF	CsDMR1	375	389	+	15.875	1.34e-06	0.059	ttggtggtggcgacg
Cucsa.359570	GATA	CsDMR2	193	207	-	14.0781	1.34e-06	0.0536	TCACCATCTTCATCT
Cucsa.161430	MYB	CsF3H1	164	178	+	15.9688	1.34e-06	0.153	aaaagtagccgttag
Cucsa.277740	AP2	CsACO1	1363	1382	-	16.3462	1.34e-06	0.00257	AAGGAGAAAAAAGAAAAAAA
Cucsa.307870	C2H2	CsGA2ox1	1957	1975	+	15.7542	1.35e-06	0.01	tctccttcttcttcttctc
Cucsa.026600	BBR-BPC	CsDOXA6.5	1102	1125	+	10.0938	1.35e-06	0.00307	aaaaaagagagagagagactaggg
Cucsa.102120	Dof	CsFLS1	1227	1255	-	15.9062	1.35e-06	0.00624	CCAACTCTCTTTTCCACTTTTTTAATGTT
Cucsa.341290	Dof	CsF6H1	1395	1415	-	15.0156	1.36e-06	0.0142	AAAAAGAAAAAGAAACAAATA
Cucsa.277240	C2H2	CsDOXC21.3	1173	1188	-	16.726	1.36e-06	0.23	ATTTTGTCATTTTGTG
Cucsa.118450	MYB	CsDOXA6.4	206	226	+	16.5781	1.36e-06	0.0604	ctcccaccctaacaactccac
Cucsa.136780	ERF	CsDOXC55.2	1158	1178	+	15.3088	1.36e-06	0.048	gcccacagcggcggcggcgca
Cucsa.362960	MIKC_MADS	CsDOXC45.1	247	267	-	16.1739	1.37e-06	0.00215	CTTTTTTCTTTTCTTTTCTTC
Cucsa.337320	MYB	CsJOX2	353	371	+	16.4375	1.37e-06	0.0791	ccccatcaaccacccacac
Cucsa.280310	GRAS	CsGA7ox2	1605	1624	+	15.8696	1.37e-06	0.0153	aagaaaaaaagaaaagggaa
Cucsa.341140	C2H2	CsDOXC20.4	798	815	-	16.7656	1.37e-06	0.162	AAGAAAAAGACAAAGATC
Cucsa.277740	AP2	CsD4H5	1327	1346	+	16.3205	1.37e-06	0.00261	aaaaagaagaaaaatagagg
Cucsa.026600	BBR-BPC	CsDOXB1.3	1839	1862	+	10.0469	1.37e-06	0.00308	cacagaagttgagagagagagaat
Cucsa.118450	MYB	CsGA7ox2	856	876	+	16.5625	1.37e-06	0.0604	atgacacttcacctaccactt
Cucsa.127860	MYB	CsDOXC17.2	646	656	+	15.9375	1.37e-06	0.126	atggttggtgg
Cucsa.102120	Dof	CsDOXB1.2	303	331	-	15.8906	1.38e-06	0.00625	TTTTTTCTCTCTTCTTCTTTCCCTTTCTT
Cucsa.026600	BBR-BPC	CsGA2ox1	846	869	-	10.0312	1.38e-06	0.00308	TAGATGAAGAAAGAGAAATAGAGA
Cucsa.026600	BBR-BPC	CsDOXC3.2	1354	1377	-	10.0312	1.38e-06	0.00308	AAGAAGAAGAGAGAGATAATGGCA
Cucsa.118340	NAC	CsDOXA6.4	1879	1895	-	16.9747	1.38e-06	0.163	CAGCGTCAATTTGACGG
Cucsa.362960	MIKC_MADS	CsD4H6	1245	1265	+	16.1594	1.39e-06	0.00215	ttccaccttctctttctttca
Cucsa.362960	MIKC_MADS	CsGA2ox5	19	39	-	16.1594	1.39e-06	0.00215	TTTTCTTCTTTCTTTTTTTCA
Cucsa.362960	MIKC_MADS	CsGA2ox5	50	70	-	16.1594	1.39e-06	0.00215	TTTTCTTCTTTCTTTTTTTCA
Cucsa.362960	MIKC_MADS	CsGA2ox5	81	101	-	16.1594	1.39e-06	0.00215	TTTTCTTCTTTCTTTTTTTCA
Cucsa.310360	ERF	CsDMR1	371	391	-	13.3676	1.39e-06	0.0488	CCCGTCGCCACCACCAATCCC
Cucsa.277740	AP2	CsACO1	1359	1378	-	16.3077	1.39e-06	0.00261	AGAAAAAAGAAAAAAATAAA
Cucsa.277740	AP2	CsGA2ox3	821	840	+	16.3077	1.39e-06	0.00261	aaaaaaaagaaaagaaaaga
Cucsa.277740	AP2	CsGA2ox1	1271	1290	+	16.3077	1.39e-06	0.00261	aaaaaaaagaaaagaaaaga
Cucsa.026600	BBR-BPC	CsDOXC37.1	1859	1882	-	10.0156	1.39e-06	0.00308	GAGAGAGAGAAATAGAAATTAAAA
Cucsa.341290	Dof	CsDOXC20.3	1954	1974	+	14.9844	1.42e-06	0.0142	aaaaagaaaaaggaattagaa
Cucsa.088640	ERF	CsD4H5	503	517	-	16.3594	1.42e-06	0.0626	GGATATGCCGGTGGT
Cucsa.098430	Dof	CsDOXB3.3	1000	1020	+	15.2031	1.42e-06	0.0135	caaaaatagcaaaaggaaaaa
Cucsa.255340	ERF	CsDOXA6.4	283	310	+	15.5	1.42e-06	0.0624	ctgttctagccgccattggtcgagaatc
Cucsa.277740	AP2	CsD4H3	534	553	-	16.2821	1.42e-06	0.00263	AAAAAAATGAAAAAAAAAGG
Cucsa.026600	BBR-BPC	CsGA2ox5	1717	1740	-	9.95312	1.43e-06	0.00314	GAGAGAGTGTGACAGAATGAAATG
Cucsa.362960	MIKC_MADS	CsDOXB1.3	1729	1749	-	16.1304	1.43e-06	0.00218	TTCTTTTATTTTTCTCTCTCG
Cucsa.152170	ARF	CsDOXA6.4	1982	1990	+	13.9263	1.43e-06	0.507	cttgtcggc
Cucsa.043520	WOX	CsD4H9	1580	1590	+	16.5063	1.44e-06	0.161	tcaatcattca
Cucsa.043520	WOX	CsDOXC20.5	1884	1894	+	16.5063	1.44e-06	0.161	tcaatcattca
Cucsa.277740	AP2	CsGA3ox2	873	892	+	16.2692	1.44e-06	0.00263	agaaagaagaaaaaaaaaga
Cucsa.102120	Dof	CsACO5	282	310	-	15.8438	1.44e-06	0.00646	GTACTTTCTTCTTTCACTTTATTTCTTTG
Cucsa.353140	TALE	CsD4H1	147	166	+	16.3733	1.44e-06	0.0103	ccctttcttcttcctcccgc
Cucsa.364380	bZIP	CsDOXB3.4	1807	1821	+	16.7812	1.45e-06	0.104	cattctgacgtggca
Cucsa.251110	TCP	CsGA2ox3	1434	1443	-	16.9681	1.45e-06	0.0892	TGGGACCCAC
Cucsa.251110	TCP	CsACO3	1712	1721	-	16.9681	1.45e-06	0.0892	TGGGACCCAC
Cucsa.341290	Dof	CsF3H2	1141	1161	+	14.9688	1.45e-06	0.0142	aaaaaaaaaaagtaacgaaag
Cucsa.362960	MIKC_MADS	CsD4H1	144	164	+	16.1159	1.45e-06	0.00218	cttccctttcttcttcctccc
Cucsa.362960	MIKC_MADS	CsGA2ox5	1117	1137	+	16.1159	1.45e-06	0.00218	ttttctttttcccctctcctt
Cucsa.362960	MIKC_MADS	CsF3H2	1825	1845	+	16.1159	1.45e-06	0.00218	tttttttttctctttttgtgt
Cucsa.362960	MIKC_MADS	CsGA2ox1	1958	1978	+	16.1159	1.45e-06	0.00218	ctccttcttcttcttctctca
Cucsa.362960	MIKC_MADS	CsD4H4	949	969	-	16.1159	1.45e-06	0.00218	CTTTCTTTTGTGTTTTTTTCT
Cucsa.362960	MIKC_MADS	CsGA20ox2	1968	1988	-	16.1159	1.45e-06	0.00218	TTTTATTTTCTTTTTCCTTTT
Cucsa.026600	BBR-BPC	CsGA2ox3	837	860	+	9.90625	1.45e-06	0.00317	aagaaaaagaaaaagaaaaagaag
Cucsa.349500	TCP	CsACO3	1711	1720	-	16.375	1.45e-06	0.0825	GGGACCCACT
Cucsa.277740	AP2	CsDOXC55.1	995	1014	-	16.2564	1.46e-06	0.00263	AAAGGAAAAGAAAAGAAAAG
Cucsa.277740	AP2	CsGA2ox3	846	865	+	16.2564	1.46e-06	0.00263	aaaaagaaaaagaagaaacg
Cucsa.336890	ERF	CsLBO1	660	670	+	16.2656	1.46e-06	0.0601	tttccaccgcc
Cucsa.112090	C2H2	CsGA7ox2	998	1012	-	16.6094	1.47e-06	0.125	AGAAAAAGACAAATC
Cucsa.042770	ERF	CsD4H1	948	968	+	15.7969	1.47e-06	0.043	tgcccatcttctcagccgctt
Cucsa.307870	C2H2	CsGA2ox1	1513	1531	+	15.6102	1.47e-06	0.0105	acccccccccccccccccc
Cucsa.307870	C2H2	CsDMR1	440	458	-	15.6102	1.47e-06	0.0105	CCCCAATTTCTTCCTCCCC
Cucsa.364380	bZIP	CsDOXC23.1	1008	1022	-	16.75	1.47e-06	0.104	TGTGATCACGTGGCT
Cucsa.026600	BBR-BPC	CsGA20ox1	868	891	+	9.875	1.47e-06	0.00319	atttgggggaaagagagggagagc
Cucsa.054000	TCP	CsGA2ox3	1436	1444	+	16.5638	1.47e-06	0.0869	gggtcccac
Cucsa.054000	TCP	CsACO2	1684	1692	-	16.5638	1.47e-06	0.0869	GGGTCCCAC
Cucsa.277740	AP2	CsJOX1	1933	1952	+	16.2436	1.47e-06	0.00263	gaaaaaaaaaaaaaaaaaca
Cucsa.359570	GATA	CsGA7ox1	204	218	-	13.8594	1.48e-06	0.0536	TCATCATCCTCATCA
Cucsa.341290	Dof	CsGA2ox5	1112	1132	-	14.9531	1.48e-06	0.0142	GAGGGGAAAAAGAAAAGAAAG
Cucsa.341290	Dof	CsDOXC52.2	972	992	+	14.9531	1.48e-06	0.0142	gaaagaaaaaagtgaaataaa
Cucsa.341290	Dof	CsDOXB3.3	1003	1023	+	14.9531	1.48e-06	0.0142	aaatagcaaaaggaaaaaaaa
Cucsa.353140	TALE	CsGA3ox1	537	556	-	16.3333	1.48e-06	0.0104	CTCTCTCTCTCTTTTCCTTC
Cucsa.197650	TCP	CsACO4	772	791	-	8.56977	1.48e-06	0.053	ACTTGTTGTGTGGGTCTCAC
Cucsa.396070	bZIP	CsDOXC23.2	726	743	+	16.7188	1.49e-06	0.105	ttgtttgccacgtcgaca
Cucsa.259560	HD-ZIP	CsDOXC27.1	1855	1867	+	16.1875	1.49e-06	0.181	acaatgattgatt
Cucsa.280310	GRAS	CsACO5	1777	1796	-	15.7826	1.49e-06	0.0153	GAAGAAAGGACAAAAACAGT
Cucsa.277740	AP2	CsGA2ox3	1052	1071	-	16.2308	1.49e-06	0.00263	GGTAAAAAAGAAAAGAAAAG
Cucsa.175390	Dof	CsDOXC17.2	24	38	+	14.7969	1.49e-06	0.0646	cctttcaactttttc
Cucsa.078480	B3	CsGA2ox5	933	941	+	16.0345	1.5e-06	0.53	ctgcatgca
Cucsa.362960	MIKC_MADS	CsACO1	1367	1387	+	16.087	1.5e-06	0.00223	tttcttttttctcctttttca
Cucsa.362960	MIKC_MADS	CsGA7ox2	1605	1625	-	16.087	1.5e-06	0.00223	TTTCCCTTTTCTTTTTTTCTT
Cucsa.197650	TCP	CsDOXC23.1	1360	1379	+	8.52326	1.5e-06	0.053	taatcaaatgtgggatccac
Cucsa.307870	C2H2	CsDOXC37.3	779	797	+	15.5678	1.51e-06	0.0105	cccccctccccccctacac
Cucsa.277740	AP2	CsGA2ox1	1681	1700	-	16.2179	1.51e-06	0.00263	GAGAGAGAGAGAGAGAGTGG
Cucsa.277740	AP2	CsDOXB1.3	1737	1756	+	16.2179	1.51e-06	0.00263	aaaaataaaagaaaaagaag
Cucsa.349500	TCP	CsGA2ox3	1433	1442	-	16.3365	1.51e-06	0.0825	GGGACCCACG
Cucsa.047280	MIKC_MADS	CsDOXB3.2	1711	1729	-	15.75	1.52e-06	0.178	TGCTTTCTTTTTTAGGAAA
Cucsa.101370	ERF	CsDOXC55.2	1096	1114	-	15.9688	1.52e-06	0.0891	ACGGAGAGAGGCGGCTGAG
Cucsa.175390	Dof	CsFLS1	1233	1247	-	14.7812	1.52e-06	0.0646	CTTTTCCACTTTTTT
Cucsa.362960	MIKC_MADS	CsDOXC55.1	989	1009	+	16.0725	1.52e-06	0.00225	tgttttcttttcttttctttt
Cucsa.018420	MIKC_MADS	CsLBO1	675	688	+	16.0469	1.52e-06	0.0921	acaaaaagggaaaa
Cucsa.069280	ERF	CsDOXC23.1	347	354	-	16.5481	1.52e-06	0.18	GCGGCGCC
Cucsa.277740	AP2	CsD4H8	1477	1496	-	16.2051	1.53e-06	0.00263	AAGAAGAAGAAAAGGAAAAA
Cucsa.277740	AP2	CsF3H2	1821	1840	-	16.2051	1.53e-06	0.00263	AAAAGAGAAAAAAAAAAAGG
Cucsa.336890	ERF	CsDMR1	323	333	-	16.2188	1.53e-06	0.0601	TCGCCACCACC
Cucsa.336890	ERF	CsDMR1	377	387	-	16.2188	1.53e-06	0.0601	TCGCCACCACC
Cucsa.112760	MYB	CsF6H1	1585	1603	-	16.3281	1.53e-06	0.0562	TCGGAGGTGGTTAGGAATT
Cucsa.078700	bHLH	CsDOXC23.2	121	134	+	16.6438	1.54e-06	0.296	tgttggtcacgtgg
Cucsa.102120	Dof	CsGA2ox1	1272	1300	-	15.7812	1.54e-06	0.00679	TTACATTTCTTCTTTTCTTTTCTTTTTTT
Cucsa.047280	MIKC_MADS	CsGA3ox3	168	186	-	15.7353	1.54e-06	0.178	TTTTTTCTCCTTTGGGAAA
Cucsa.159750	BBR-BPC	CsGA2ox1	1676	1696	+	9.68493	1.54e-06	0.005	aaaaaccactctctctctctc
Cucsa.098430	Dof	CsGA2ox1	1825	1845	+	15.1406	1.54e-06	0.0141	aagaaaaagaaaaagaaataa
Cucsa.362960	MIKC_MADS	CsGA20ox3	794	814	+	16.058	1.54e-06	0.00225	ttttctcttttctgtttcttt
Cucsa.362960	MIKC_MADS	CsDOXB1.2	300	320	-	16.058	1.54e-06	0.00225	TTCTTCTTTCCCTTTCTTCTC
Cucsa.277740	AP2	CsGA2ox3	1016	1035	-	16.1923	1.54e-06	0.00263	AAAGAAAAGAAAAGAAAAGA
Cucsa.277740	AP2	CsGA2ox3	1021	1040	-	16.1923	1.54e-06	0.00263	AAAGAAAAGAAAAGAAAAGA
Cucsa.277740	AP2	CsGA2ox3	1026	1045	-	16.1923	1.54e-06	0.00263	AAAGAAAAGAAAAGAAAAGA
Cucsa.277740	AP2	CsGA2ox3	1031	1050	-	16.1923	1.54e-06	0.00263	AAAGAAAAGAAAAGAAAAGA
Cucsa.277740	AP2	CsGA2ox3	1036	1055	-	16.1923	1.54e-06	0.00263	AAAGAAAAGAAAAGAAAAGA
Cucsa.277740	AP2	CsGA2ox3	1041	1060	-	16.1923	1.54e-06	0.00263	AAAGAAAAGAAAAGAAAAGA
Cucsa.277740	AP2	CsGA2ox3	1046	1065	-	16.1923	1.54e-06	0.00263	AAAGAAAAGAAAAGAAAAGA
Cucsa.277740	AP2	CsF6H2	1589	1608	+	16.1923	1.54e-06	0.00263	aagaaaaaagaagaaataga
Cucsa.061590	bHLH	CsDMR6	1823	1833	+	16.7031	1.55e-06	0.136	agcaagttgca
Cucsa.143260	bHLH	CsDOXC23.2	155	168	-	16.2031	1.55e-06	0.183	GTAGCAACTTGCAA
Cucsa.234310	MYB	CsDOXC20.3	1937	1951	-	14.5469	1.55e-06	0.107	TAAGTGTTTGGTGGG
Cucsa.258270	MYB	CsGA2ox1	521	535	+	16.25	1.55e-06	0.13	ttggtggtgggtgga
Cucsa.195660	ERF	CsDOXA6.1	1433	1440	-	16.9468	1.56e-06	0.138	CGCCGCCA
Cucsa.388650	WRKY	CsDOXC55.1	1494	1504	+	16.7031	1.56e-06	0.543	aaaagtcaacc
Cucsa.104200	HD-ZIP	CsGA20ox4	522	532	+	13.0149	1.56e-06	0.168	caatcattcag
Cucsa.104200	HD-ZIP	CsGA20ox3	1551	1561	+	13.0149	1.56e-06	0.168	caatcatgcag
Cucsa.213830	Dof	CsGA2ox5	1066	1086	+	15.625	1.56e-06	0.0068	ttttctttttctttcattttc
Cucsa.277740	AP2	CsD4H4	1344	1363	-	16.1795	1.56e-06	0.00265	AAAGAAGAAAAAAAAAGAGT
Cucsa.362960	MIKC_MADS	CsD4H8	1479	1499	+	16.0435	1.57e-06	0.00225	tttccttttcttcttctttat
Cucsa.321150	ERF	CsDMR1	319	339	-	14.0938	1.57e-06	0.0603	AACCCGTCGCCACCACCATAC
Cucsa.159750	BBR-BPC	CsGA2ox4	436	456	-	9.63014	1.57e-06	0.00506	TTCTCTGTCTCTCTTTTCATC
Cucsa.098430	Dof	CsDOXC37.1	1967	1987	-	15.125	1.57e-06	0.0141	AAAGAAAAGAAAAAGTTATTA
Cucsa.113040	bHLH	CsD4H6	1335	1349	+	16.5616	1.57e-06	0.198	aaatgtgccacgtgg
Cucsa.026600	BBR-BPC	CsDOXC37.1	1914	1937	-	9.6875	1.58e-06	0.00341	GAGAGAAATTAAAAAAGAGAGGAA
Cucsa.362960	MIKC_MADS	CsGA2ox3	1015	1035	+	16.029	1.59e-06	0.00225	ttcttttcttttcttttcttt
Cucsa.362960	MIKC_MADS	CsGA2ox3	1020	1040	+	16.029	1.59e-06	0.00225	ttcttttcttttcttttcttt
Cucsa.362960	MIKC_MADS	CsGA2ox3	1025	1045	+	16.029	1.59e-06	0.00225	ttcttttcttttcttttcttt
Cucsa.362960	MIKC_MADS	CsGA2ox3	1030	1050	+	16.029	1.59e-06	0.00225	ttcttttcttttcttttcttt
Cucsa.362960	MIKC_MADS	CsGA2ox3	1035	1055	+	16.029	1.59e-06	0.00225	ttcttttcttttcttttcttt
Cucsa.362960	MIKC_MADS	CsGA2ox3	1040	1060	+	16.029	1.59e-06	0.00225	ttcttttcttttcttttcttt
Cucsa.362960	MIKC_MADS	CsGA2ox3	1045	1065	+	16.029	1.59e-06	0.00225	ttcttttcttttcttttcttt
Cucsa.362960	MIKC_MADS	CsGA3ox2	1664	1684	+	16.029	1.59e-06	0.00225	ttcttttttctttttattttt
Cucsa.238090	TCP	CsDOXC37.1	1556	1585	+	14.5063	1.59e-06	0.0798	gatgggaccaacgctacctttggcttctgc
Cucsa.307870	C2H2	CsGA2ox1	1510	1528	+	15.4746	1.6e-06	0.0107	cccaccccccccccccccc
Cucsa.112760	MYB	CsD4H2	370	388	+	16.2812	1.6e-06	0.0562	ctattagtggttgggaatt
Cucsa.277740	AP2	CsDOXC23.1	232	251	-	16.1538	1.6e-06	0.0027	TAAAGAAAAAGAAAAAGAAA
Cucsa.167500	WRKY	CsDOXC55.1	1494	1506	+	16.5625	1.61e-06	0.562	aaaagtcaaccct
Cucsa.213830	Dof	CsDOXA6.3	1890	1910	-	15.5938	1.61e-06	0.00694	ATAACTTTTTTTTTCTTTTTT
Cucsa.359880	ERF	CsDOXA6.1	1424	1444	+	15.6094	1.61e-06	0.0689	cactaacaatggcggcgaaat
Cucsa.258270	MYB	CsDOXC37.2	575	589	+	16.2031	1.61e-06	0.13	aaggtggtagttgga
Cucsa.362960	MIKC_MADS	CsDOXC3.1	657	677	-	16.0145	1.61e-06	0.00227	TTTTTTTTTTTTTTTTTGTTG
Cucsa.362960	MIKC_MADS	CsD4H4	886	906	-	16.0145	1.61e-06	0.00227	TTTTCCTTTTCTTCTTTTTGT
Cucsa.237150	ERF	CsDOXA6.1	1124	1143	+	15.625	1.62e-06	0.0631	tgccgccaaagccgccacag
Cucsa.277740	AP2	CsD4H4	1037	1056	+	16.141	1.62e-06	0.00272	taaaagaagaagaagaaagg
Cucsa.088640	ERF	CsDOXA6.4	196	210	-	16.1406	1.62e-06	0.0636	GGGAGGGACGGTGGT
Cucsa.046660	ERF	CsDMR1	321	337	+	14.9375	1.62e-06	0.0675	atggtggtggcgacggg
Cucsa.310360	ERF	CsGA2ox7	791	811	-	13.0294	1.63e-06	0.05	ACTGCCAGCGCTGCCGCAGAT
Cucsa.127860	MYB	CsGA20ox3	278	288	+	15.8281	1.63e-06	0.126	gaagttggtgg
Cucsa.349500	TCP	CsACO2	1683	1692	-	16.3173	1.63e-06	0.0825	GGGTCCCACA
Cucsa.349500	TCP	CsGA2ox3	1436	1445	+	16.3173	1.63e-06	0.0825	gggtcccaca
Cucsa.213830	Dof	CsDOXC27.1	347	367	+	15.5781	1.63e-06	0.00696	gtcactttatgcttttttttc
Cucsa.277740	AP2	CsJOX2	1880	1899	+	16.1282	1.64e-06	0.00272	taaaaaaaaaaaaaaaaaaa
Cucsa.277740	AP2	CsGA20ox3	1977	1996	+	16.1282	1.64e-06	0.00272	taaaaaaaaaaaaaaaaaaa
Cucsa.362960	MIKC_MADS	CsGA3ox1	607	627	-	16	1.64e-06	0.00229	TTTTTGTCTTTGTCTCTGTCT
Cucsa.280310	GRAS	CsDOXC52.1	1033	1052	-	15.6812	1.64e-06	0.0153	GACAAAAGGAGAAAAAAAAC
Cucsa.280310	GRAS	CsDMR5	1235	1254	+	15.6812	1.64e-06	0.0153	aagaaagaaagaaagaaaga
Cucsa.280310	GRAS	CsDMR5	1239	1258	+	15.6812	1.64e-06	0.0153	aagaaagaaagaaagaaaga
Cucsa.280310	GRAS	CsDMR5	1243	1262	+	15.6812	1.64e-06	0.0153	aagaaagaaagaaagaaaga
Cucsa.280310	GRAS	CsDMR5	1247	1266	+	15.6812	1.64e-06	0.0153	aagaaagaaagaaagaaaga
Cucsa.280310	GRAS	CsDMR5	1251	1270	+	15.6812	1.64e-06	0.0153	aagaaagaaagaaagaaaga
Cucsa.341290	Dof	CsGA2ox3	828	848	+	14.875	1.64e-06	0.0148	agaaaagaaaagaaaaagaaa
Cucsa.353140	TALE	CsDOXC21.4	1312	1331	-	16.1733	1.64e-06	0.0112	TTCTCCGCCTTCGCTCCCCT
Cucsa.252730	GATA	CsDMR6	584	602	+	14.6667	1.64e-06	0.0435	catcaccagcatcatggta
Cucsa.307870	C2H2	CsD4H6	1241	1259	+	15.4237	1.64e-06	0.0107	cttcttccaccttctcttt
Cucsa.136780	ERF	CsDOXA6.1	1503	1523	-	14.9559	1.65e-06	0.0527	ATCGCCGCCGCTGGTGGTGCG
Cucsa.308740	C2H2	CsF3H1	4	14	+	13.1094	1.65e-06	0.251	cagtgaagtgg
Cucsa.232340	BES1	CsDOXC24.1	1247	1266	+	16.5938	1.66e-06	0.585	ccgcacgtgttctttagaag
Cucsa.102120	Dof	CsGA20ox3	1868	1896	+	15.7031	1.66e-06	0.00724	ttaatccttcttttggcttttctcttttt
Cucsa.341140	C2H2	CsDOXC21.3	1173	1190	+	16.4844	1.66e-06	0.162	cacaaaatgacaaaatga
Cucsa.307870	C2H2	CsGA2ox1	1783	1801	+	15.4068	1.66e-06	0.0107	cctcattctctccttcctt
Cucsa.362960	MIKC_MADS	CsDOXC20.2	1249	1269	+	15.9855	1.66e-06	0.0023	ctccatttttttttttttttg
Cucsa.362960	MIKC_MADS	CsDOXA6.5	1094	1114	-	15.9855	1.66e-06	0.0023	CTCTCTCTTTTTTCTCTTTTA
Cucsa.362960	MIKC_MADS	CsF3H2	1137	1157	-	15.9855	1.66e-06	0.0023	CGTTACTTTTTTTTTTTTTTT
Cucsa.159750	BBR-BPC	CsGA2ox1	1782	1802	+	9.46575	1.67e-06	0.00532	ccctcattctctccttccttc
Cucsa.307870	C2H2	CsGA3ox1	1416	1434	-	15.3983	1.67e-06	0.0107	CCTCTTCTCCCTATACCTC
Cucsa.363020	TCP	CsACO3	1703	1723	+	14.1324	1.67e-06	0.0772	atcatcaaagtgggtcccatt
Cucsa.341290	Dof	CsDOXC23.1	232	252	-	14.8594	1.68e-06	0.0148	TTAAAGAAAAAGAAAAAGAAA
Cucsa.341290	Dof	CsACO1	1371	1391	-	14.8594	1.68e-06	0.0148	ACATTGAAAAAGGAGAAAAAA
Cucsa.258270	MYB	CsDOXC17.2	643	657	+	16.1562	1.69e-06	0.13	attatggttggtgga
Cucsa.102120	Dof	CsDOXC55.1	989	1017	+	15.6875	1.69e-06	0.00726	tgttttcttttcttttcttttcctttttg
Cucsa.213830	Dof	CsDOXA6.3	771	791	+	15.5469	1.69e-06	0.00709	ttagctttttcttttttatta
Cucsa.362960	MIKC_MADS	CsGA2ox3	829	849	-	15.971	1.69e-06	0.00232	TTTTCTTTTTCTTTTCTTTTC
Cucsa.362960	MIKC_MADS	CsJOX1	1934	1954	-	15.971	1.69e-06	0.00232	TCTGTTTTTTTTTTTTTTTTT
Cucsa.271720	ERF	CsF3H2	251	269	-	15.5312	1.69e-06	0.0498	GGGCATAGGTGGAGGTGGT
Cucsa.337320	MYB	CsGA2ox1	521	539	-	16.2031	1.7e-06	0.0842	TTTTTCCACCCACCACCAA
Cucsa.237150	ERF	CsDOXC45.1	995	1014	+	15.5469	1.7e-06	0.0631	tactgataccgccaccacca
Cucsa.198560	Dof	CsACO1	1373	1386	-	14.0938	1.71e-06	0.105	GAAAAAGGAGAAAA
Cucsa.112810	Dof	CsACO1	1010	1028	+	15.3594	1.71e-06	0.0411	taaaaaaaaaaagtgcaca
Cucsa.321150	ERF	CsDOXC55.2	1157	1177	-	13.875	1.71e-06	0.0603	GCGCCGCCGCCGCTGTGGGCT
Cucsa.026600	BBR-BPC	CsD4H5	1088	1111	-	9.48438	1.71e-06	0.00365	GGGATGGAAAGATGAAGAAAGAAA
Cucsa.026600	BBR-BPC	CsGA2ox5	1239	1262	-	9.48438	1.71e-06	0.00365	AAGAGAGAGAGATGAAGACGCGGC
Cucsa.237150	ERF	CsLBO1	655	674	+	15.5312	1.71e-06	0.0631	cccattttccaccgccacca
Cucsa.362960	MIKC_MADS	CsGA20ox3	668	688	-	15.9565	1.71e-06	0.00234	GCTTTCCTTTCCTTTTTTTCT
Cucsa.213830	Dof	CsF3H2	1818	1838	+	15.5312	1.72e-06	0.00709	ttgcctttttttttttctctt
Cucsa.310360	ERF	CsF3H2	251	271	+	12.9118	1.72e-06	0.05	accacctccacctatgcccca
Cucsa.307870	C2H2	CsDOXC45.1	1468	1486	-	15.3475	1.72e-06	0.0107	CCTTATCTTCCTCCTCTCT
Cucsa.161430	MYB	CsGA2ox3	292	306	-	15.8125	1.73e-06	0.153	AAATATAGCCGTTGA
Cucsa.277740	AP2	CsJOX1	1931	1950	+	16.0641	1.74e-06	0.00287	cagaaaaaaaaaaaaaaaaa
Cucsa.098430	Dof	CsD4H4	887	907	+	15.0469	1.74e-06	0.0152	caaaaagaagaaaaggaaaaa
Cucsa.102120	Dof	CsDOXB6.1	1264	1292	-	15.6562	1.74e-06	0.00739	CTGCACTTTTTTTTTTCTTTATCCATTTC
Cucsa.213830	Dof	CsGA3ox2	1655	1675	+	15.5156	1.74e-06	0.00709	caaacttttttcttttttctt
Cucsa.251110	TCP	CsGA2ox3	1394	1403	-	16.1702	1.74e-06	0.0892	TGGGGCCCAG
Cucsa.127860	MYB	CsDOXC45.1	1006	1016	-	15.7656	1.75e-06	0.126	GGTGGTGGTGG
Cucsa.341140	C2H2	CsGA7ox2	996	1013	-	16.4062	1.75e-06	0.162	AAGAAAAAGACAAATCTA
Cucsa.241900	Dof	CsDOXC3.2	706	716	-	13.5625	1.76e-06	0.149	CAAAAAGTGAA
Cucsa.241900	Dof	CsDOXC27.1	743	753	+	13.5625	1.76e-06	0.149	caaaaagtgaa
Cucsa.277740	AP2	CsF6H2	1745	1764	+	16.0513	1.76e-06	0.00289	aataaaataaagaagaaaaa
Cucsa.046660	ERF	CsDMR1	378	394	+	14.7656	1.76e-06	0.0675	gtggtggcgacgggact
Cucsa.307870	C2H2	CsACO3	1147	1165	-	15.3136	1.76e-06	0.0107	CCCCCCCCCCCCCCCCCCA
Cucsa.129320	ERF	CsDOXC55.2	1096	1110	-	15.2969	1.76e-06	0.0691	AGAGAGGCGGCTGAG
Cucsa.359880	ERF	CsDOXC55.2	1154	1174	+	15.4375	1.76e-06	0.0689	accagcccacagcggcggcgg
Cucsa.362960	MIKC_MADS	CsGA2ox1	1783	1803	+	15.9275	1.77e-06	0.0024	cctcattctctccttccttct
Cucsa.112320	HD-ZIP	CsGA7ox1	759	769	-	15.5469	1.77e-06	0.289	GCATTAAATGT
Cucsa.112320	HD-ZIP	CsDMR3	1221	1231	-	15.5469	1.77e-06	0.289	GCATTAAATGT
Cucsa.018420	MIKC_MADS	CsD4H4	1224	1237	-	15.875	1.77e-06	0.0921	CCAAAAATGGAAAT
Cucsa.213830	Dof	CsGA2ox3	1053	1073	+	15.5	1.77e-06	0.00709	ttttcttttcttttttaccct
Cucsa.307870	C2H2	CsDOXC37.2	718	736	+	15.2966	1.77e-06	0.0107	ctctctccccttcctcttt
Cucsa.277740	AP2	CsDOXB1.2	317	336	+	16.0385	1.78e-06	0.00291	agaagagagaaaaaaaaaag
Cucsa.159750	BBR-BPC	CsDOXB1.3	957	977	-	9.28767	1.78e-06	0.00562	CACTCTCTTTCTCCATCCCCA
Cucsa.280310	GRAS	CsACO4	1783	1802	-	15.5942	1.78e-06	0.0161	AAGAAGAAGAGAGAAGATAA
Cucsa.130050	G2-like	CsDOXC20.1	372	382	+	13.8906	1.79e-06	0.205	aaaggaatgtt
Cucsa.126960	NAC	CsDOXC23.1	283	297	+	15.8125	1.79e-06	0.333	cttgagaatcacgcc
Cucsa.277740	AP2	CsGA2ox5	1067	1086	-	16.0256	1.8e-06	0.00293	GAAAATGAAAGAAAAAGAAA
Cucsa.273670	BES1	CsDOXB3.1	1963	1973	-	16.8281	1.8e-06	0.318	CGCACGTGTTC
Cucsa.273670	BES1	CsDOXC24.1	1248	1258	+	16.8281	1.8e-06	0.318	cgcacgtgttc
Cucsa.026600	BBR-BPC	CsGA7ox2	350	373	+	9.35938	1.8e-06	0.00381	gtgagacaaaagggaaaagagaga
Cucsa.112810	Dof	CsGA2ox5	1762	1780	-	15.3125	1.8e-06	0.0411	AGTAAACGAAAAGGGAAAA
Cucsa.252730	GATA	CsGA7ox1	178	196	-	14.4783	1.81e-06	0.0445	CATCATTGTCATCATCTTG
Cucsa.349640	MIKC_MADS	CsGA20ox5	84	96	-	15.3235	1.81e-06	0.288	CCCAAAAAGGAAC
Cucsa.248080	bZIP	CsD4H1	1883	1897	-	15.4062	1.81e-06	0.321	AATGCTGATGTGGAA
Cucsa.353140	TALE	CsDOXB1.2	1733	1752	+	16.0133	1.82e-06	0.0118	tagtctcttctcctctctcc
Cucsa.362960	MIKC_MADS	CsGA3ox1	609	629	-	15.8986	1.82e-06	0.00245	TTTTTTTGTCTTTGTCTCTGT
Cucsa.362960	MIKC_MADS	CsDOXA6.5	1105	1125	-	15.8986	1.82e-06	0.00245	CCCTAGTCTCTCTCTCTCTTT
Cucsa.341290	Dof	CsDOXC17.2	268	288	-	14.7969	1.82e-06	0.0156	GAAAAAAAAAAGTGGAGAAGA
Cucsa.289120	bZIP	CsDOXC23.1	1009	1020	-	15.7021	1.82e-06	0.206	TGATCACGTGGC
Cucsa.175390	Dof	CsACO1	1372	1386	+	14.6719	1.83e-06	0.0675	tttttctcctttttc
Cucsa.363020	TCP	CsGA2ox3	1433	1453	-	13.9265	1.83e-06	0.0772	GTGAAGTGTGTGGGACCCACG
Cucsa.307870	C2H2	CsDOXC21.3	1341	1359	+	15.2458	1.83e-06	0.0107	cttcttctacttcatcttc
Cucsa.353140	TALE	CsACO3	1154	1173	-	16	1.83e-06	0.0118	CCTATCCCCCCCCCCCCCCC
Cucsa.353140	TALE	CsGA2ox1	1508	1527	+	16	1.83e-06	0.0118	ctcccacccccccccccccc
Cucsa.277740	AP2	CsGA3ox2	1659	1678	-	16	1.84e-06	0.00297	AAAAAGAAAAAAGAAAAAAG
Cucsa.353050	bHLH	CsDOXC23.1	1002	1022	+	16.3699	1.84e-06	0.195	aaagagagccacgtgatcaca
Cucsa.338950	ZF-HD	CsGA20ox3	1617	1631	-	13.8971	1.84e-06	0.152	TTTATCACCTAATTA
Cucsa.159820	E2F/DP	CsGA20ox4	569	583	+	16.1809	1.85e-06	0.647	aaatggtagccaaaa
Cucsa.362960	MIKC_MADS	CsDOXB1.3	1502	1522	-	15.8841	1.85e-06	0.00248	TCTTTTTTTTGTTTTTTTTTT
Cucsa.139620	MIKC_MADS	CsD4H4	1224	1241	+	15.443	1.85e-06	0.327	atttccatttttggtaag
Cucsa.194390	GATA	CsDOXA6.1	1516	1530	+	16.0735	1.85e-06	0.0595	gcggcgatgaaggtc
Cucsa.277740	AP2	CsGA7ox1	401	420	-	15.9872	1.86e-06	0.00297	AGGAAGGAGAAAAGGAAAGG
Cucsa.277740	AP2	CsDOXC45.1	801	820	+	15.9872	1.86e-06	0.00297	caaaagaaaaagaaaagaag
Cucsa.277740	AP2	CsGA2ox1	1827	1846	+	15.9872	1.86e-06	0.00297	gaaaaagaaaaagaaataaa
Cucsa.342870	ARF	CsDOXA6.4	1981	1990	-	15.1875	1.86e-06	0.649	GCCGACAAGG
Cucsa.213830	Dof	CsGA2ox5	1325	1345	+	15.4531	1.86e-06	0.00709	ttttctttttatcctttttaa
Cucsa.341290	Dof	CsDMR2	1970	1990	-	14.7812	1.86e-06	0.0156	AGTAGAAAAAAGGAAAAAGAA
Cucsa.310360	ERF	CsGA2ox7	794	814	-	12.7353	1.87e-06	0.05	AGAACTGCCAGCGCTGCCGCA
Cucsa.307870	C2H2	CsF3H2	49	67	+	15.2119	1.87e-06	0.0107	tctcttcagactccacctc
Cucsa.307870	C2H2	CsDOXC37.2	724	742	+	15.2119	1.87e-06	0.0107	ccccttcctctttttactc
Cucsa.026600	BBR-BPC	CsACO4	1706	1729	-	9.25	1.88e-06	0.00395	ATGTGGGAAAGAGGGGGAAGGTGG
Cucsa.353050	bHLH	CsACO4	1252	1272	+	16.3425	1.88e-06	0.195	tgacattgccacgtgcatgct
Cucsa.013870	MYB	CsACO2	908	920	+	15.7188	1.88e-06	0.65	ctagaggataagg
Cucsa.277740	AP2	CsDOXC45.1	246	265	+	15.9744	1.88e-06	0.00299	agaagaaaagaaaagaaaaa
Cucsa.098430	Dof	CsF3H2	1816	1836	-	14.9844	1.88e-06	0.0161	GAGAAAAAAAAAAAGGCAATA
Cucsa.341140	C2H2	CsDOXC20.5	1610	1627	-	16.2969	1.89e-06	0.162	CAGATCAAGACAAAAATG
Cucsa.258270	MYB	CsDOXC55.1	1686	1700	+	16.0312	1.89e-06	0.13	aggttggttggttgg
Cucsa.307870	C2H2	CsACO4	1707	1725	+	15.1949	1.89e-06	0.0107	caccttccccctctttccc
Cucsa.248870	MIKC_MADS	CsGA3ox3	166	184	-	16.1562	1.9e-06	0.218	TTTTCTCCTTTGGGAAATG
Cucsa.158340	MYB	CsD4H8	1936	1950	+	15.75	1.9e-06	0.0737	cccctaaccacttac
Cucsa.307870	C2H2	CsF3H2	252	270	+	15.1864	1.9e-06	0.0107	ccacctccacctatgcccc
Cucsa.341290	Dof	CsDOXC45.1	806	826	+	14.7656	1.9e-06	0.0156	gaaaaagaaaagaagaagagg
Cucsa.362960	MIKC_MADS	CsACO4	1788	1808	+	15.8551	1.9e-06	0.00252	ttctctcttcttcttcttctt
Cucsa.362960	MIKC_MADS	CsGA20ox3	1882	1902	+	15.8551	1.9e-06	0.00252	ggcttttctctttttctcttt
Cucsa.362960	MIKC_MADS	CsDOXA6.3	1886	1906	-	15.8551	1.9e-06	0.00252	CTTTTTTTTTCTTTTTTTCTT
Cucsa.277740	AP2	CsGA2ox1	1753	1772	-	15.9615	1.9e-06	0.00301	GAGAGAAAAGGAGGGAGAGG
Cucsa.112810	Dof	CsGA2ox5	1754	1772	-	15.2656	1.9e-06	0.0411	AAAAGGGAAAAAGGGATGG
Cucsa.102120	Dof	CsDOXC52.1	1029	1057	+	15.5625	1.91e-06	0.0079	ttttgttttttttctccttttgtcctaac
Cucsa.102120	Dof	CsGA2ox3	1553	1581	+	15.5625	1.91e-06	0.0079	ttttttttatttttttctttatatatatt
Cucsa.136780	ERF	CsDOXA6.4	193	213	-	14.6765	1.91e-06	0.0561	GGTGGGAGGGACGGTGGTGCG
Cucsa.217940	CAMTA	CsGA2ox5	1237	1245	+	13.6058	1.91e-06	0.678	cggccgcgt
Cucsa.026600	BBR-BPC	CsDOXC52.2	1784	1807	-	9.1875	1.92e-06	0.00402	TATGAAAAGAGAGAGAGAGAATAG
Cucsa.277740	AP2	CsGA2ox1	1901	1920	-	15.9487	1.92e-06	0.00302	GAAACAGAGGAAGAAAAAGA
Cucsa.277740	AP2	CsDOXC45.1	807	826	+	15.9487	1.92e-06	0.00302	aaaaagaaaagaagaagagg
Cucsa.353140	TALE	CsACO3	1153	1172	-	15.92	1.93e-06	0.0122	CTATCCCCCCCCCCCCCCCC
Cucsa.362960	MIKC_MADS	CsDOXC23.1	232	252	+	15.8406	1.93e-06	0.00254	tttctttttctttttctttaa
Cucsa.362960	MIKC_MADS	CsACO3	1820	1840	+	15.8406	1.93e-06	0.00254	tttgtttttttttttttcttt
Cucsa.280310	GRAS	CsDOXB1.2	315	334	+	15.5072	1.93e-06	0.0171	gaagaagagagaaaaaaaaa
Cucsa.100440	WRKY	CsDOXC17.1	1351	1361	-	16.4302	1.93e-06	0.342	TTGACCGCGGT
Cucsa.349500	TCP	CsDMR1	712	721	+	16.1923	1.93e-06	0.0856	tgggcccact
Cucsa.018420	MIKC_MADS	CsDOXB3.2	1714	1727	+	15.7656	1.93e-06	0.0921	cctaaaaaagaaag
Cucsa.026600	BBR-BPC	CsDOXA6.5	1100	1123	+	9.17188	1.93e-06	0.00402	agaaaaaagagagagagagactag
Cucsa.102560	ERF	CsDOXC45.1	1003	1017	+	16.3281	1.93e-06	0.138	ccgccaccaccacca
Cucsa.307870	C2H2	CsGA2ox7	942	960	+	15.1525	1.94e-06	0.0107	cctccacttcttcttgcac
Cucsa.112810	Dof	CsJOX2	557	575	+	15.25	1.94e-06	0.0411	aaaaagtgaaaaggaaaaa
Cucsa.277740	AP2	CsDOXC37.1	1916	1935	-	15.9359	1.95e-06	0.00304	GAGAAATTAAAAAAGAGAGG
Cucsa.362960	MIKC_MADS	CsDOXC55.1	990	1010	+	15.8261	1.96e-06	0.00257	gttttcttttcttttcttttc
Cucsa.098430	Dof	CsDMR5	54	74	-	14.9531	1.96e-06	0.0163	CAAAGAAGCAAAAAGGAGATC
Cucsa.252700	MYB	CsDOXC17.1	632	641	-	15.7212	1.96e-06	0.347	TGGTAGGTAG
Cucsa.307870	C2H2	CsDOXC45.1	1360	1378	-	15.1271	1.96e-06	0.0107	CACCTTCTTCTCCATCCTC
Cucsa.102120	Dof	CsACO5	1867	1895	+	15.5312	1.97e-06	0.00805	tatctttttttcttttcttttcatttgtt
Cucsa.349220	Trihelix	CsACO4	1744	1761	-	14.6176	1.97e-06	0.231	AAAAGAATGGGCCCTTAA
Cucsa.026600	BBR-BPC	CsDMR5	1225	1248	+	9.125	1.97e-06	0.00404	gacaaaaataaagaaagaaagaaa
Cucsa.026600	BBR-BPC	CsDOXB1.2	1734	1757	-	9.125	1.97e-06	0.00404	ACGAAGGAGAGAGGAGAAGAGACT
Cucsa.363020	TCP	CsDOXC21.4	257	277	-	13.75	1.97e-06	0.0772	TCTTGAACAAGGGGCCCCACC
Cucsa.156340	MYB	CsGA20ox5	1680	1692	+	15.5588	1.97e-06	0.34	ctcaccaacccta
Cucsa.102560	ERF	CsLBO1	657	671	+	16.2969	1.98e-06	0.138	cattttccaccgcca
Cucsa.255340	ERF	CsDOXB6.1	226	253	-	14.6562	1.98e-06	0.0773	TGGATGAAGCCGCCTGCACAGACGGTAG
Cucsa.109420	bZIP	CsDOXC23.2	122	136	-	15.4219	1.98e-06	0.269	AGCCACGTGACCAAC
Cucsa.175390	Dof	CsDOXB3.3	1905	1919	+	14.6406	1.98e-06	0.0675	tatttttcctttttc
Cucsa.159750	BBR-BPC	CsGA3ox1	1130	1150	-	8.9863	1.98e-06	0.00618	CTCTCACTCTTCCTCTCTTCC
Cucsa.277740	AP2	CsGA2ox5	14	33	+	15.9103	1.99e-06	0.00305	agggatgaaaaaaagaaaga
Cucsa.277740	AP2	CsGA2ox5	45	64	+	15.9103	1.99e-06	0.00305	agggatgaaaaaaagaaaga
Cucsa.277740	AP2	CsGA2ox5	76	95	+	15.9103	1.99e-06	0.00305	agggatgaaaaaaagaaaga
Cucsa.277740	AP2	CsGA2ox3	826	845	+	15.9103	1.99e-06	0.00305	aaagaaaagaaaagaaaaag
Cucsa.198560	Dof	CsDOXB3.3	1906	1919	-	14.0469	1.99e-06	0.105	GAAAAAGGAAAAAT
Cucsa.159750	BBR-BPC	CsDOXC24.1	1472	1492	-	8.9726	1.99e-06	0.00618	CTCTATCTCTCTCCATTTTTT
Cucsa.026600	BBR-BPC	CsGA3ox1	1398	1421	+	9.09375	1.99e-06	0.00404	aagaagaagaataagagagaggta
Cucsa.026600	BBR-BPC	CsACO4	1570	1593	+	9.09375	1.99e-06	0.00404	aagagaggaaggggaagtagggga
Cucsa.178830	LBD	CsDOXB3.2	149	169	-	14.9531	2e-06	0.127	ACAATGCCATCATTTCCGGCG
Cucsa.178830	LBD	CsDOXA6.1	1505	1525	-	14.9531	2e-06	0.127	TCATCGCCGCCGCTGGTGGTG
Cucsa.026600	BBR-BPC	CsGA7ox2	660	683	-	9.07812	2.01e-06	0.00404	AAGACAGTAAAAGAAAGAAACAGA
Cucsa.277740	AP2	CsDOXC55.4	720	739	+	15.8974	2.01e-06	0.00307	aaaggaaaaaaagaaaaaga
Cucsa.359570	GATA	CsGA7ox1	168	182	-	13.0625	2.01e-06	0.0657	TCTTGATCGTCATCA
Cucsa.362960	MIKC_MADS	CsDOXC3.1	95	115	+	15.7971	2.01e-06	0.00262	ttttactttctttttctgttt
Cucsa.362960	MIKC_MADS	CsDOXC55.1	998	1018	+	15.7971	2.01e-06	0.00262	ttcttttcttttcctttttgg
Cucsa.213830	Dof	CsGA3ox2	1669	1689	+	15.375	2.02e-06	0.00709	ttttctttttatttttttaat
Cucsa.213830	Dof	CsDOXC37.1	1663	1683	-	15.375	2.02e-06	0.00709	ATGGCTTTTTTTTTTTTTTTT
Cucsa.327980	MIKC_MADS	CsLBO1	30	41	+	15.1525	2.02e-06	0.169	ccaaatatggga
Cucsa.341290	Dof	CsD4H8	1474	1494	-	14.7188	2.02e-06	0.0161	GAAGAAGAAAAGGAAAAAATA
Cucsa.240210	NAC	CsDOXC23.1	280	300	-	16.0156	2.02e-06	0.712	ATTGGCGTGATTCTCAAGCGA
Cucsa.307870	C2H2	CsACO3	1153	1171	-	15.0763	2.02e-06	0.0108	TATCCCCCCCCCCCCCCCC
Cucsa.102120	Dof	CsDOXB3.3	1002	1030	-	15.5	2.03e-06	0.00815	ATTATCATTTTTTTTCCTTTTGCTATTTT
Cucsa.042770	ERF	CsGA2ox7	793	813	-	15.25	2.03e-06	0.055	GAACTGCCAGCGCTGCCGCAG
Cucsa.277740	AP2	CsDOXB1.1	898	917	-	15.8846	2.03e-06	0.00307	CAAAAAAAAAAAAAAAAAGA
Cucsa.277740	AP2	CsDOXA6.5	1600	1619	-	15.8846	2.03e-06	0.00307	TAAAAAAAGTAAAAAAGAGA
Cucsa.277740	AP2	CsD4H4	888	907	+	15.8846	2.03e-06	0.00307	aaaaagaagaaaaggaaaaa
Cucsa.163800	C2H2	CsDOXC20.4	799	815	-	16.2812	2.04e-06	0.192	AAGAAAAAGACAAAGAT
Cucsa.051050	MYB	CsFLS1	365	379	-	15.6875	2.04e-06	0.159	TCCAACTACCGCTCT
Cucsa.310360	ERF	CsDMR1	374	394	-	12.5441	2.04e-06	0.05	AGTCCCGTCGCCACCACCAAT
Cucsa.026600	BBR-BPC	CsDOXC55.3	16	39	-	9.03125	2.04e-06	0.00409	AACTGAGGTAGAGGTAGAGAAATA
Cucsa.362960	MIKC_MADS	CsGA2ox4	763	783	+	15.7826	2.04e-06	0.00265	cgtttttttctctttttttat
Cucsa.213830	Dof	CsDOXC3.2	181	201	-	15.3594	2.05e-06	0.00709	ATCCCTTTTTCTTTTTTTTAT
Cucsa.067080	MYB	CsDOXC17.1	1453	1473	+	15.9114	2.05e-06	0.411	agtgtttaggataagaagcgg
Cucsa.277740	AP2	CsDOXB1.2	1758	1777	+	15.8718	2.06e-06	0.00307	caggaaaaaaagaaaaaaga
Cucsa.277740	AP2	CsDOXA6.3	1884	1903	+	15.8718	2.06e-06	0.00307	aaaagaaaaaaagaaaaaaa
Cucsa.012850	ERF	CsDOXC21.4	1310	1330	-	13.9853	2.06e-06	0.0484	TCTCCGCCTTCGCTCCCCTTG
Cucsa.341290	Dof	CsGA20ox2	1961	1981	+	14.7031	2.06e-06	0.0161	ccaaataaaaaggaaaaagaa
Cucsa.231820	ERF	CsDOXC45.1	1000	1014	+	15.6875	2.06e-06	0.0662	ataccgccaccacca
Cucsa.126860	ERF	CsDOXA6.1	1433	1440	-	18.1442	2.06e-06	0.183	CGCCGCCA
Cucsa.107190	ERF	CsDOXA6.1	1434	1441	-	15.9574	2.06e-06	0.183	TCGCCGCC
Cucsa.107190	ERF	CsDOXA6.1	1515	1522	-	15.9574	2.06e-06	0.183	TCGCCGCC
Cucsa.118450	MYB	CsDOXC23.1	570	590	-	15.9844	2.07e-06	0.0719	TACACATATCACCTACCACAA
Cucsa.026600	BBR-BPC	CsGA3ox1	1396	1419	+	9	2.07e-06	0.00409	aaaagaagaagaataagagagagg
Cucsa.026600	BBR-BPC	CsGA2ox1	1507	1530	-	9	2.07e-06	0.00409	GGGGGGGGGGGGGGGGGTGGGAGA
Cucsa.159750	BBR-BPC	CsDOXB3.3	1392	1412	-	8.86301	2.07e-06	0.00632	TTCACTCCCTCTCTCATTTTT
Cucsa.353140	TALE	CsDMR1	354	373	-	15.8	2.07e-06	0.0129	CCCCTCTTGCCCGTCCGTCG
Cucsa.198560	Dof	CsDOXC55.1	1004	1017	-	14.0156	2.08e-06	0.105	CAAAAAGGAAAAGA
Cucsa.098430	Dof	CsJOX2	555	575	+	14.9062	2.08e-06	0.0169	taaaaaagtgaaaaggaaaaa
Cucsa.213830	Dof	CsGA2ox5	1756	1776	+	15.3438	2.08e-06	0.00709	atccctttttcccttttcgtt
Cucsa.213830	Dof	CsDOXC27.1	68	88	-	15.3438	2.08e-06	0.00709	TTTTTTTTTTTTTTTTTTTTT
Cucsa.213830	Dof	CsDOXC27.1	69	89	-	15.3438	2.08e-06	0.00709	TTTTTTTTTTTTTTTTTTTTT
Cucsa.213830	Dof	CsDOXC27.1	70	90	-	15.3438	2.08e-06	0.00709	TTTTTTTTTTTTTTTTTTTTT
Cucsa.213830	Dof	CsDOXC27.1	71	91	-	15.3438	2.08e-06	0.00709	TTTTTTTTTTTTTTTTTTTTT
Cucsa.213830	Dof	CsDOXC20.4	619	639	-	15.3438	2.08e-06	0.00709	TTTTTTTTTTTTTTTTTTTTT
Cucsa.213830	Dof	CsDOXC20.4	620	640	-	15.3438	2.08e-06	0.00709	TTTTTTTTTTTTTTTTTTTTT
Cucsa.213830	Dof	CsDOXC20.4	621	641	-	15.3438	2.08e-06	0.00709	TTTTTTTTTTTTTTTTTTTTT
Cucsa.213830	Dof	CsDOXC20.4	622	642	-	15.3438	2.08e-06	0.00709	TTTTTTTTTTTTTTTTTTTTT
Cucsa.213830	Dof	CsJOX2	1881	1901	-	15.3438	2.08e-06	0.00709	TTTTTTTTTTTTTTTTTTTTT
Cucsa.213830	Dof	CsGA20ox3	1978	1998	-	15.3438	2.08e-06	0.00709	TTTTTTTTTTTTTTTTTTTTT
Cucsa.096740	bZIP	CsDOXC23.2	122	136	+	15.3594	2.08e-06	0.279	gttggtcacgtggct
Cucsa.026600	BBR-BPC	CsGA2ox1	1827	1850	+	8.98438	2.08e-06	0.00409	gaaaaagaaaaagaaataaaggga
Cucsa.307870	C2H2	CsGA2ox1	1520	1538	+	15.0254	2.09e-06	0.011	ccccccccccccctttctt
Cucsa.102120	Dof	CsD4H4	1004	1032	-	15.4688	2.09e-06	0.00815	CATTCTTTTTTCTTTTCTTTTTTTGTGAT
Cucsa.102120	Dof	CsDMR5	1233	1261	-	15.4688	2.09e-06	0.00815	CTTTCTTTCTTTCTTTCTTTCTTTCTTTA
Cucsa.026600	BBR-BPC	CsDOXC37.1	1796	1819	-	8.96875	2.09e-06	0.00409	AATTGAGAGAGATATATATAGAGA
Cucsa.047860	TCP	CsDOXC21.4	258	265	-	17.5481	2.09e-06	0.186	GGCCCCAC
Cucsa.047860	TCP	CsGA2ox3	1397	1404	+	17.5481	2.09e-06	0.186	ggccccac
Cucsa.159750	BBR-BPC	CsGA2ox1	1756	1776	+	8.83562	2.1e-06	0.00632	ctccctccttttctctcttat
Cucsa.159750	BBR-BPC	CsDOXB1.3	1843	1863	-	8.83562	2.1e-06	0.00632	AATTCTCTCTCTCTCAACTTC
Cucsa.362960	MIKC_MADS	CsDOXC20.2	1705	1725	+	15.7536	2.1e-06	0.00272	tttctttatttttctttctca
Cucsa.047510	WRKY	CsACO2	644	654	+	16.1875	2.1e-06	0.244	aaaagtcaaca
Cucsa.047510	WRKY	CsDOXC20.2	393	403	-	16.1875	2.1e-06	0.244	AAAAGTCAACA
Cucsa.365220	ERF	CsLBO1	651	670	+	15.8906	2.11e-06	0.216	atatcccattttccaccgcc
Cucsa.127860	MYB	CsGA3ox2	666	676	+	15.5156	2.11e-06	0.126	gtggttggtgt
Cucsa.308740	C2H2	CsD4H7	159	169	+	13.0469	2.12e-06	0.251	gagtgatggag
Cucsa.102120	Dof	CsGA2ox5	1751	1779	+	15.4531	2.12e-06	0.00815	tttccatccctttttcccttttcgtttac
Cucsa.271720	ERF	CsDOXC55.2	1094	1112	-	15.125	2.13e-06	0.0577	GGAGAGAGGCGGCTGAGCG
Cucsa.277740	AP2	CsDOXC55.3	248	267	-	15.8333	2.13e-06	0.00315	AAAAAAAAAAAAAAAAGAAT
Cucsa.277740	AP2	CsDOXA6.3	1882	1901	+	15.8333	2.13e-06	0.00315	ataaaagaaaaaaagaaaaa
Cucsa.194390	GATA	CsDOXA6.1	1513	1527	+	15.8676	2.13e-06	0.0627	gcggcggcgatgaag
Cucsa.362960	MIKC_MADS	CsDOXC55.2	866	886	+	15.7391	2.13e-06	0.00274	ttcgtttttttttcttttttg
Cucsa.362960	MIKC_MADS	CsDOXC55.1	995	1015	+	15.7391	2.13e-06	0.00274	cttttcttttcttttcctttt
Cucsa.192470	SBP	CsDOXA6.4	1934	1942	-	13.4327	2.14e-06	0.757	CTGTACGGC
Cucsa.043300	SRS	CsDOXC21.3	115	124	-	15.5726	2.14e-06	0.632	CCCCTAGGCT
Cucsa.288680	NAC	CsDOXA6.4	410	424	-	16.0625	2.14e-06	0.242	AGCTTATCGGAGACG
Cucsa.242740	C3H	CsDOXC23.1	26	39	+	13.6094	2.14e-06	0.124	aaagaaaaaggtag
Cucsa.046660	ERF	CsDOXC45.1	1002	1018	-	14.3281	2.14e-06	0.0675	CTGGTGGTGGTGGCGGT
Cucsa.280310	GRAS	CsGA3ox2	1864	1883	-	15.3913	2.15e-06	0.0185	AAGAAAGGGACAAAACATGT
Cucsa.341290	Dof	CsDOXB1.2	1758	1778	+	14.6719	2.15e-06	0.0164	caggaaaaaaagaaaaaagaa
Cucsa.277740	AP2	CsGA2ox5	1113	1132	-	15.8205	2.15e-06	0.00316	GAGGGGAAAAAGAAAAGAAA
Cucsa.277740	AP2	CsJOX2	556	575	+	15.8205	2.15e-06	0.00316	aaaaaagtgaaaaggaaaaa
Cucsa.102120	Dof	CsGA7ox2	1608	1636	-	15.4375	2.16e-06	0.00815	TTATTCTAAATTTTCCCTTTTCTTTTTTT
Cucsa.102120	Dof	CsF3H2	1806	1834	+	15.4375	2.16e-06	0.00815	ccctttcctttattgcctttttttttttc
Cucsa.387680	bHLH	CsACO4	1260	1267	+	16.9362	2.16e-06	0.383	ccacgtgc
Cucsa.387680	bHLH	CsD4H8	1305	1312	+	16.9362	2.16e-06	0.383	ccacgtgc
Cucsa.120670	bHLH	CsACO4	1260	1267	+	16.8617	2.16e-06	0.383	ccacgtgc
Cucsa.120670	bHLH	CsD4H8	1305	1312	+	16.8617	2.16e-06	0.383	ccacgtgc
Cucsa.178830	LBD	CsGA2ox7	793	813	-	14.8125	2.16e-06	0.127	GAACTGCCAGCGCTGCCGCAG
Cucsa.353140	TALE	CsGA2ox1	1511	1530	+	15.7333	2.16e-06	0.0129	ccaccccccccccccccccc
Cucsa.353140	TALE	CsDOXC21.2	257	276	-	15.7333	2.16e-06	0.0129	CTCTCCATCTCTCTTCCTTT
Cucsa.129320	ERF	CsDOXA6.1	1130	1144	-	14.8438	2.17e-06	0.0765	GCTGTGGCGGCTTTG
Cucsa.026600	BBR-BPC	CsDOXC52.3	927	950	+	8.875	2.17e-06	0.00419	gagggaaggaaggaaagagaaatg
Cucsa.026600	BBR-BPC	CsGA2ox3	1181	1204	-	8.875	2.17e-06	0.00419	AATTGGGAAAGAAAGAAAAAGAAA
Cucsa.047280	MIKC_MADS	CsGA20ox1	513	531	+	15.3824	2.17e-06	0.188	ttttttctatttttagaaa
Cucsa.126960	NAC	CsACO1	1111	1125	-	15.625	2.18e-06	0.333	CTTCAGCCTCACGAT
Cucsa.234310	MYB	CsDOXC20.5	419	433	+	14.375	2.18e-06	0.125	cttatgtttggtgga
Cucsa.353140	TALE	CsDOXC45.1	1345	1364	-	15.72	2.18e-06	0.0129	TCCTCTTCCCCTCTCACTCG
Cucsa.118450	MYB	CsD4H3	55	75	+	15.9062	2.18e-06	0.0719	ctgcctctataccaacctcca
Cucsa.213830	Dof	CsDOXC52.2	869	889	-	15.2969	2.18e-06	0.00736	ATTACTTTTTTTTTTTTTTAA
Cucsa.237150	ERF	CsDOXB5.1	416	435	+	15.1406	2.18e-06	0.0631	taacatcaccaccaccaacg
Cucsa.112090	C2H2	CsDOXC3.1	112	126	-	16.125	2.18e-06	0.148	TAAAAGAGACAAAAC
Cucsa.078700	bHLH	CsDOXC37.3	1889	1902	+	16.2466	2.19e-06	0.296	ggatcgtcacgtga
Cucsa.278220	MYB_related	CsACO2	1222	1235	+	14.6719	2.19e-06	0.266	aacaaaatatctta
Cucsa.112760	MYB	CsFLS1	365	383	+	15.9219	2.19e-06	0.07	agagcggtagttggagatg
Cucsa.102120	Dof	CsD4H5	1320	1348	-	15.4219	2.19e-06	0.00815	TGCCTCTATTTTTCTTCTTTTTTTGTTAT
Cucsa.102120	Dof	CsDOXB3.2	1444	1472	-	15.4219	2.19e-06	0.00815	AAATTGCTCCTTTTTACTTTTTTACATAT
Cucsa.365220	ERF	CsDOXA6.1	1515	1534	-	15.8281	2.19e-06	0.216	TTGCGACCTTCATCGCCGCC
Cucsa.362960	MIKC_MADS	CsGA2ox1	1737	1757	+	15.7101	2.2e-06	0.00279	cccctatctctctctccctct
Cucsa.362960	MIKC_MADS	CsGA2ox3	1971	1991	+	15.7101	2.2e-06	0.00279	cctcttcttctgcttcctctt
Cucsa.362960	MIKC_MADS	CsGA20ox3	1683	1703	-	15.7101	2.2e-06	0.00279	TCTTATTATTTCTCTCTTTCC
Cucsa.112810	Dof	CsDOXC20.4	567	585	-	15.1406	2.2e-06	0.0414	AAAAAATAAAAAGTAAATA
Cucsa.112810	Dof	CsDOXC52.2	971	989	+	15.1406	2.2e-06	0.0414	tgaaagaaaaaagtgaaat
Cucsa.026600	BBR-BPC	CsGA20ox3	1686	1709	+	8.84375	2.2e-06	0.00422	aagagagaaataataagaaagagt
Cucsa.277740	AP2	CsD4H7	733	752	+	15.7949	2.2e-06	0.00321	aggaaagtaaagaaaacaga
Cucsa.046660	ERF	CsDOXA6.1	1432	1448	+	14.2656	2.2e-06	0.0675	atggcggcgaaatcact
Cucsa.026600	BBR-BPC	CsDOXB1.3	959	982	+	8.82812	2.21e-06	0.00422	gggatggagaaagagagtgtaatg
Cucsa.041880	MYB	CsDMR5	1188	1202	-	15.0625	2.21e-06	0.541	TTAAATTAGGTGAGC
Cucsa.018420	MIKC_MADS	CsDOXB3.3	142	155	+	15.6406	2.21e-06	0.0921	acaaaaaaagaaaa
Cucsa.018420	MIKC_MADS	CsD4H4	1007	1020	+	15.6406	2.21e-06	0.0921	acaaaaaaagaaaa
Cucsa.307870	C2H2	CsD4H6	1235	1253	+	14.9237	2.22e-06	0.0115	tcttctcttcttccacctt
Cucsa.353050	bHLH	CsD4H6	1337	1357	-	16.0959	2.22e-06	0.195	AAAGAGTACCACGTGGCACAT
Cucsa.395710	C2H2	CsDOXC27.1	1732	1742	+	13.9077	2.22e-06	0.421	cagtgccactc
Cucsa.251110	TCP	CsDMR1	711	720	+	15.8085	2.22e-06	0.0892	atgggcccac
Cucsa.251110	TCP	CsD4H9	718	727	-	15.8085	2.22e-06	0.0892	ATGGGCCCAC
Cucsa.277740	AP2	CsDOXC55.4	718	737	+	15.7821	2.22e-06	0.00324	caaaaggaaaaaaagaaaaa
Cucsa.362960	MIKC_MADS	CsGA7ox1	403	423	+	15.6957	2.23e-06	0.0028	tttccttttctccttcctcgt
Cucsa.362960	MIKC_MADS	CsDOXC45.1	1624	1644	+	15.6957	2.23e-06	0.0028	tcttctcttttctttctttat
Cucsa.362960	MIKC_MADS	CsACO1	1724	1744	-	15.6957	2.23e-06	0.0028	GCCTCTTTTTTTTTTTTTTTT
Cucsa.198560	Dof	CsGA20ox1	1586	1599	+	13.9844	2.23e-06	0.105	caaaaagtaaaaca
Cucsa.353140	TALE	CsGA2ox1	1738	1757	+	15.68	2.23e-06	0.013	ccctatctctctctccctct
Cucsa.026600	BBR-BPC	CsDOXC52.3	925	948	+	8.79688	2.24e-06	0.00424	atgagggaaggaaggaaagagaaa
Cucsa.252730	GATA	CsGA7ox1	202	220	-	14.058	2.24e-06	0.0514	AGTCATCATCCTCATCATC
Cucsa.175390	Dof	CsDOXC55.1	1003	1017	+	14.5625	2.24e-06	0.0693	ttcttttcctttttg
Cucsa.237150	ERF	CsLBO1	658	677	+	15.0938	2.25e-06	0.0631	attttccaccgccaccaaca
Cucsa.162360	bZIP	CsDOXC23.2	731	745	-	15.9375	2.25e-06	0.631	GTTGTCGACGTGGCA
Cucsa.098430	Dof	CsDOXC17.2	271	291	-	14.8438	2.25e-06	0.0178	GGTGAAAAAAAAAAGTGGAGA
Cucsa.255340	ERF	CsDOXC55.2	1150	1177	-	14.3125	2.25e-06	0.0789	GCGCCGCCGCCGCTGTGGGCTGGTTTGA
Cucsa.277740	AP2	CsGA2ox1	1817	1836	+	15.7692	2.25e-06	0.00326	tgagagaaaagaaaaagaaa
Cucsa.213830	Dof	CsJOX2	553	573	-	15.2656	2.25e-06	0.00745	TTTCCTTTTCACTTTTTTACT
Cucsa.112530	MYB_related	CsJOX2	452	463	+	15.7969	2.25e-06	0.451	gaaaatatcttc
Cucsa.102120	Dof	CsACO3	237	265	-	15.3906	2.25e-06	0.00819	CCATTCTTTTATTTTGCTTTATTACTTTT
Cucsa.362960	MIKC_MADS	CsDOXB6.1	911	931	+	15.6812	2.26e-06	0.00282	cttcagctttttttttttttt
Cucsa.054000	TCP	CsGA2ox3	1434	1442	-	16.1702	2.26e-06	0.1	GGGACCCAC
Cucsa.054000	TCP	CsACO3	1712	1720	-	16.1702	2.26e-06	0.1	GGGACCCAC
Cucsa.310360	ERF	CsDOXA6.1	1536	1556	+	12.3235	2.26e-06	0.05	ggcgccaacacaacctcaacc
Cucsa.302760	ERF	CsD4H2	1883	1897	-	16.25	2.26e-06	0.375	CACTGTCGGCAAATA
Cucsa.280310	GRAS	CsD4H4	1006	1025	+	15.3333	2.26e-06	0.019	cacaaaaaaagaaaagaaaa
Cucsa.288680	NAC	CsDOXC52.2	1943	1957	+	16	2.26e-06	0.242	agcttgaaactcaag
Cucsa.159750	BBR-BPC	CsGA3ox1	1118	1138	-	8.61644	2.27e-06	0.00676	CTCTCTTCCTCTCTTCCTAAA
Cucsa.237150	ERF	CsDOXB5.1	419	438	+	15.0781	2.27e-06	0.0631	catcaccaccaccaacgtag
Cucsa.118450	MYB	CsFLS1	366	386	-	15.8438	2.28e-06	0.0719	CATCATCTCCAACTACCGCTC
Cucsa.310360	ERF	CsDOXC55.2	1161	1181	-	12.3088	2.28e-06	0.05	GATTGCGCCGCCGCCGCTGTG
Cucsa.307870	C2H2	CsF3H2	203	221	+	14.8729	2.28e-06	0.0117	ccttttcttcctctccctg
Cucsa.213830	Dof	CsGA2ox1	896	916	+	15.25	2.29e-06	0.00745	atctctttttttttttttttg
Cucsa.213830	Dof	CsDOXB3.3	1909	1929	+	15.25	2.29e-06	0.00745	tttcctttttccttcctcgta
Cucsa.109420	bZIP	CsDOXC23.1	1008	1022	+	15.1406	2.29e-06	0.269	agccacgtgatcaca
Cucsa.291770	Trihelix	CsDOXC17.1	1347	1356	-	14.7155	2.29e-06	0.767	CGCGGTAACT
Cucsa.102120	Dof	CsDMR5	1229	1257	-	15.375	2.29e-06	0.00819	CTTTCTTTCTTTCTTTCTTTCTTTATTTT
Cucsa.102120	Dof	CsDOXA6.3	1894	1922	-	15.375	2.29e-06	0.00819	GCTTCTCAATTTATAACTTTTTTTTTCTT
Cucsa.365320	ERF	CsLBO1	660	674	+	15.0469	2.29e-06	0.101	tttccaccgccacca
Cucsa.046660	ERF	CsLBO1	656	672	-	14.1719	2.3e-06	0.0675	GTGGCGGTGGAAAATGG
Cucsa.159750	BBR-BPC	CsGA2ox5	1242	1262	+	8.57534	2.3e-06	0.00676	gcgtcttcatctctctctctt
Cucsa.159750	BBR-BPC	CsDOXC52.2	1785	1805	+	8.57534	2.3e-06	0.00676	tattctctctctctcttttca
Cucsa.277740	AP2	CsDOXC27.1	67	86	+	15.7436	2.3e-06	0.00328	caaaaaaaaaaaaaaaaaaa
Cucsa.277740	AP2	CsDOXC20.4	618	637	+	15.7436	2.3e-06	0.00328	caaaaaaaaaaaaaaaaaaa
Cucsa.277740	AP2	CsDOXC3.1	660	679	+	15.7436	2.3e-06	0.00328	caaaaaaaaaaaaaaaaaaa
Cucsa.277740	AP2	CsDOXC17.1	1631	1650	+	15.7436	2.3e-06	0.00328	agaaacaaaaaaagaagaag
Cucsa.026600	BBR-BPC	CsGA2ox1	1731	1754	-	8.71875	2.3e-06	0.00435	GGGAGAGAGAGATAGGGGTGAATT
Cucsa.327980	MIKC_MADS	CsDMR5	840	851	+	14.9407	2.31e-06	0.169	ctaaaagtggaa
Cucsa.177060	WRKY	CsDOXC55.1	1494	1506	-	16.2969	2.31e-06	0.815	AGGGTTGACTTTT
Cucsa.104340	MYB	CsGA20ox1	846	866	+	15.3125	2.31e-06	0.113	tggtgtggagtaggtgcaagt
Cucsa.273460	TCP	CsGA2ox3	1395	1404	+	15.9574	2.31e-06	0.262	tgggccccac
Cucsa.212820	HSF	CsDOXC23.1	396	414	-	15.6719	2.32e-06	0.424	TGAAAAGGCTTCTAGAAAG
Cucsa.213830	Dof	CsDOXC20.3	1447	1467	-	15.2344	2.32e-06	0.00745	TTAACTTTTAGATTTTTTTCT
Cucsa.213830	Dof	CsDOXB1.3	1505	1525	-	15.2344	2.32e-06	0.00745	TCATCTTTTTTTTGTTTTTTT
Cucsa.289120	bZIP	CsDOXC23.2	732	743	-	15.4362	2.32e-06	0.206	TGTCGACGTGGC
Cucsa.102120	Dof	CsDMR5	1237	1265	-	15.3594	2.32e-06	0.00819	CTTTCTTTCTTTCTTTCTTTCTTTCTTTC
Cucsa.102120	Dof	CsDMR5	1241	1269	-	15.3594	2.32e-06	0.00819	CTTTCTTTCTTTCTTTCTTTCTTTCTTTC
Cucsa.362960	MIKC_MADS	CsDOXC17.2	231	251	+	15.6522	2.32e-06	0.00288	tccttcttttgccctcttctt
Cucsa.362960	MIKC_MADS	CsDOXC55.4	722	742	-	15.6522	2.32e-06	0.00288	TTTTCTTTTTCTTTTTTTCCT
Cucsa.277740	AP2	CsDOXC37.1	1865	1884	-	15.7308	2.33e-06	0.0033	GAGAGAGAGAGAAATAGAAA
Cucsa.307870	C2H2	CsGA2ox5	491	509	+	14.839	2.33e-06	0.0117	cctcttccctctactctgc
Cucsa.026600	BBR-BPC	CsDOXA6.5	1104	1127	+	8.6875	2.33e-06	0.00438	aaaagagagagagagactagggac
Cucsa.098430	Dof	CsDOXB3.3	150	170	+	14.8125	2.34e-06	0.0181	agaaaaaaggaaaaggagcca
Cucsa.197650	TCP	CsDOXC21.4	249	268	+	6.89535	2.34e-06	0.0749	aatgagagggtggggcccct
Cucsa.251110	TCP	CsACO2	1684	1693	-	15.7872	2.34e-06	0.0892	AGGGTCCCAC
Cucsa.104340	MYB	CsJOX2	351	371	-	15.2969	2.34e-06	0.113	GTGTGGGTGGTTGATGGGGCA
Cucsa.026600	BBR-BPC	CsDOXB1.2	313	336	+	8.67188	2.35e-06	0.00438	aagaagaagagagaaaaaaaaaag
Cucsa.277740	AP2	CsD4H4	1347	1366	-	15.7179	2.35e-06	0.00331	TAAAAAGAAGAAAAAAAAAG
Cucsa.277740	AP2	CsGA3ox2	865	884	+	15.7179	2.35e-06	0.00331	aaaagagaagaaagaagaaa
Cucsa.362960	MIKC_MADS	CsACO1	180	200	-	15.6377	2.36e-06	0.00288	TTTTCATTTCTTTTTTTCTCT
Cucsa.362960	MIKC_MADS	CsDOXC20.4	611	631	-	15.6377	2.36e-06	0.00288	TTTTTTTTTTTTTGTATTTCT
Cucsa.362960	MIKC_MADS	CsDOXC45.1	804	824	-	15.6377	2.36e-06	0.00288	TCTTCTTCTTTTCTTTTTCTT
Cucsa.362960	MIKC_MADS	CsGA2ox1	1830	1850	-	15.6377	2.36e-06	0.00288	TCCCTTTATTTCTTTTTCTTT
Cucsa.012850	ERF	CsDOXA6.4	191	211	+	13.7059	2.36e-06	0.0519	cccgcaccaccgtccctccca
Cucsa.336890	ERF	CsDOXC52.3	1933	1943	+	15.4375	2.36e-06	0.0836	gaaccaccgcc
Cucsa.096740	bZIP	CsDOXC23.1	1008	1022	-	15.0781	2.37e-06	0.279	TGTGATCACGTGGCT
Cucsa.026600	BBR-BPC	CsDOXB1.3	1841	1864	+	8.64062	2.37e-06	0.00441	cagaagttgagagagagagaattt
Cucsa.277740	AP2	CsD4H6	1255	1274	-	15.7051	2.38e-06	0.00331	AAAAAAAAATGAAAGAAAGA
Cucsa.277740	AP2	CsACO3	1797	1816	-	15.7051	2.38e-06	0.00331	TAAGAAAAGGCAAAGAGAAA
Cucsa.194390	GATA	CsDOXA6.4	1482	1496	+	15.7059	2.39e-06	0.0649	aagatgatggtgagg
Cucsa.362960	MIKC_MADS	CsDMR5	1230	1250	-	15.6232	2.39e-06	0.00291	TCTTTCTTTCTTTCTTTATTT
Cucsa.159750	BBR-BPC	CsGA20ox1	355	375	-	8.46575	2.39e-06	0.00694	TTCTCTCTCTCTCTCAATAAG
Cucsa.102120	Dof	CsDOXC21.3	310	338	+	15.3281	2.39e-06	0.00835	aagttttttcttttttcttttgatatgca
Cucsa.213830	Dof	CsDOXC3.1	62	82	+	15.2031	2.4e-06	0.00761	atttctttttctctatttttt
Cucsa.053440	LBD	CsDOXB3.2	151	165	+	15.4844	2.4e-06	0.57	ccggaaatgatggca
Cucsa.277740	AP2	CsDOXA6.5	1590	1609	-	15.6923	2.4e-06	0.00334	AAAAAAGAGAAGAAAAGACT
Cucsa.088640	ERF	CsDOXB5.1	420	434	-	15.4688	2.4e-06	0.0782	GTTGGTGGTGGTGAT
Cucsa.026600	BBR-BPC	CsDMR2	258	281	-	8.60938	2.4e-06	0.00441	TATATATATATAGAGAGAGAGAGA
Cucsa.026600	BBR-BPC	CsDOXA6.5	1108	1131	+	8.60938	2.4e-06	0.00441	gagagagagagactagggacaata
Cucsa.159750	BBR-BPC	CsGA2ox3	1182	1202	+	8.45205	2.4e-06	0.00694	ttctttttctttctttcccaa
Cucsa.244290	ERF	CsDOXC55.2	1165	1179	+	15.8438	2.41e-06	0.284	gcggcggcggcgcaa
Cucsa.307870	C2H2	CsD4H6	1244	1262	+	14.7797	2.41e-06	0.012	cttccaccttctctttctt
Cucsa.101370	ERF	CsDOXA6.1	1506	1524	+	15.1406	2.42e-06	0.122	accaccagcggcggcgatg
Cucsa.177230	WRKY	CsDOXC37.1	1190	1204	-	15.3438	2.42e-06	0.314	TCCCTTGACTTTTTA
Cucsa.362960	MIKC_MADS	CsDOXC37.2	709	729	+	15.6087	2.42e-06	0.00293	tctttatttctctctcccctt
Cucsa.362960	MIKC_MADS	CsGA3ox1	615	635	-	15.6087	2.42e-06	0.00293	TTTTTGTTTTTTTGTCTTTGT
Cucsa.341290	Dof	CsDOXC17.1	1633	1653	+	14.5781	2.43e-06	0.0177	aaacaaaaaaagaagaagcaa
Cucsa.277740	AP2	CsGA3ox1	534	553	+	15.6795	2.43e-06	0.00336	taagaaggaaaagagagaga
Cucsa.098430	Dof	CsDOXC52.2	871	891	+	14.7812	2.43e-06	0.0183	aaaaaaaaaaaaaagtaatta
Cucsa.338950	ZF-HD	CsDOXC20.3	333	347	-	13.75	2.43e-06	0.16	TTAAATACCTAATCA
Cucsa.310360	ERF	CsDOXC55.2	1164	1184	-	12.1618	2.44e-06	0.0504	TTTGATTGCGCCGCCGCCGCT
Cucsa.212820	HSF	CsDOXB3.1	826	844	-	15.5938	2.44e-06	0.424	CCTCGATACTTCTAGAAAA
Cucsa.359880	ERF	CsDOXA6.1	1502	1522	+	14.7969	2.44e-06	0.0861	tcgcaccaccagcggcggcga
Cucsa.018420	MIKC_MADS	CsACO3	1957	1970	+	15.5	2.45e-06	0.0921	caaaaaaaggaaaa
Cucsa.088640	ERF	CsD4H4	1918	1932	-	15.4375	2.45e-06	0.0782	GATGGTGACGGAGAC
Cucsa.321150	ERF	CsDOXA6.1	1427	1447	-	12.9375	2.45e-06	0.0785	GTGATTTCGCCGCCATTGTTA
Cucsa.067080	MYB	CsGA3ox4	596	616	-	15.7089	2.45e-06	0.411	AAGAAATATGATAAGAATGGG
Cucsa.118450	MYB	CsDOXC23.1	177	197	-	15.7344	2.45e-06	0.0719	CAACCCCAACCCCAACCCCCA
Cucsa.277740	AP2	CsDOXB1.2	1736	1755	-	15.6667	2.45e-06	0.00338	GAAGGAGAGAGGAGAAGAGA
Cucsa.365220	ERF	CsDOXC45.1	997	1016	+	15.625	2.46e-06	0.216	ctgataccgccaccaccacc
Cucsa.349640	MIKC_MADS	CsGA2ox7	685	697	-	14.8824	2.46e-06	0.288	CCATAAAAGGAGA
Cucsa.362960	MIKC_MADS	CsGA2ox4	761	781	+	15.5942	2.46e-06	0.00297	cgcgtttttttctcttttttt
Cucsa.127860	MYB	CsDOXC20.3	1938	1948	-	15.3594	2.46e-06	0.126	GTGTTTGGTGG
Cucsa.359570	GATA	CsDOXB5.1	1878	1892	-	12.5781	2.46e-06	0.0732	TCTTCATCATCCTCG
Cucsa.102120	Dof	CsACO3	1959	1987	-	15.2969	2.47e-06	0.00847	GTGTGTATGTTTTTTTCTTTTCCTTTTTT
Cucsa.364380	bZIP	CsLBO1	1765	1779	+	15.6562	2.47e-06	0.146	gaaactcacgtgtca
[truncated: 2,163 more rows]

## Sheet: Table S7
Table S7. Primers used for this paper.
Primer names	Sequence (5′ – 3′)	Description
CsDOXA6.4-F	CAAGAGTGCGGAACATAGGGTGA	qRT-PCR
CsDOXA6.4-R	CTTCCTTCAGGGCCGTTCGAGTA
CsDOXC17.1-F	ACTACAGGAAAATCGTTGGAGT
CsDOXC17.1-R	CCAAACGTCCATACTTCAACAC
CsDOXB1.3-F	CACAGATGCAATTTGTGTAGGG
CsDOXB1.3-R	CGTGGCCATAAACAAGAAATCA
CsDOXB3.3-F	CCTTTTTCCTTCCTCGTAAACG
CsDOXB3.3-R	CAGAGAGAAAATGCGAGGAATG
CsACO5-F	GATGCTGGTGGTCTTATTCTTCT
CsACO5-R	ATCCTCCTGTGCTATCACTCTGT
CsACO3-F	GTTTTACAATCCGGGAAGTGAC
CsACO3-R	CGGTTGCAATAGGATCCAATTT
CsD4H1-F	TCTTCTGCCACGACAATCAATC
CsD4H1-R	GCCATCATCTCCTTCATTACGC
CsDMR1-F	CAATATAGGCGACCAATTGCAG
CsDMR1-R	GTTGTTGATCCAAGTTTCTGCT
CsD4H7-F	GATATAGGATGTAGCGAAGGGG
CsD4H7-R	CGCCGATTTGATCTTGATACAG
CsD4H9-F	ACGGAAGTCAGGAAACAATACT
CsD4H9-R	TCTCTCCAATTCGTAGTCGATG
CsDOXC20.1-F	GCATTATACGACACCGTTTCAGC
CsDOXC20.1-R	CTTTCATGGATGGGCATTAGAGG
CsDOXC27.1-F	TTTGTTATCAAGTTTCTCGGCG
CsDOXC27.1-R	GGTCGATACAGTTGAGAGCTAA
CsDOXB6.1-F	GAGTCCAAGTTAACAAAACGCT
CsDOXB6.1-R	TGAGAGAGAAGAGTAGAACCGA
CsDOXC23.1-F	ACGAGTCAACTTTACATCGAGT
CsDOXC23.1-R	GCTGTGTCAAAGTTTGTCTCAT
CsDOXB3.4-F	AAGGAGAAAAATGGTCAGCAAC
CsDOXB3.4-R	ATCGGAATTTCGAGTGTAAGGT
CsDOXB3.1-F	ACGCCAGGCTTCCGAAACAAAC
CsDOXB3.1-R	CTTCAATCACAGGGCACCCACC
CsDOXC23.2-F	AGATGCTCTGCCGAGGATAACG
CsDOXC23.2-R	TTCCTGCATTTCATCGTCTACCAA
CsDOXB5.1-F	AACCAGAAGTAGTAAGCTGGTC
CsDOXB5.1-R	ACATTCCAGAGCTCGTTCTAAA
CsF3H2-F	CCGACCCTGGAACCATTACTA
CsF3H2-R	TCCTGAACCTCCCATTGCTAA
CsACO4-F	GAGGAGAAGAAGGAAGTGTACC
CsACO4-R	GCTTCAAATCTTGGCTCCTTAG
CsDOXC45.1-F	CGTCTCTTAGCCCTTATCTCTG
CsDOXC45.1-R	GCCGCTAACATCATCTTGTATG
CsD4H3-F	CGGTGAGTGTTCAGGAGGAGA
CsD4H3-R	TTGGAGCTATTTGAGTGAGGATG
CsF6H2-F	GGATTAAATCGCACACAGATCC
CsF6H2-R	CTGAAGCAAGTCACCGATATTG
CsActin-F	TTCTGGTGATGGTGTGAGTC
CsActin-R	GGCAGTGGTGGTGAACATG
CsCSD2-F	AATGTGGTTGCTGGTGATGA
CsCSD2-R	CCAATAACGCCACAGCCTAT
CsMSD-F	GAAGAGGTTTCAGAAGGGGG
CsMSD-R	CCCAAGCAGAGGCACTAAAG
CsFSD2-F	CGTTTGGGAGCATGCTTATT
CsFSD3-R	TCGTCGCTATCTTCGTCCTT
CsCAT-F	GCTTCAGACCAGGATCTTCTC
CsCAT-R	AAGTAATTCACCTCCTCATCTCGG
CsNHX-F	AGAGCTCAAGAGTTACCACCAAGC
CsNHX-R	GCATCCATGCCGACATAGACGAAG
CsHKT-F	TGGGGTATTCCCATCTCTTG
CsHKT-R	AGATTGCCTGCGAGATGACT
CsSOS1-F	CGGTAGCATGGTTGATTTTCG
CsSOS1-R	GATTCGACCGGCTATGAGATG
F3H2-BamHI-F	acgggggactcttgaggatccATGGCCACTTTTACTGACGATGAAA	The CDS region was amplified by PCR for subcellular localization
F3H2-KpnI-R	gtcgacagatccccgggtaccAGTAGAAGGATTGAGTTTGTTTTGTCCT
